# Supplementary material
Source: PubMed Central journal article supplement (PMC5910188)

## **SUPPLEMENTARY MATERIAL**

### **Synthetic Access to the Mandelalide Family of Macrolides: Development of an Anion Relay Chemistry Strategy**

Minh H. Nguyen<sup>†</sup>, Masashi Imanishi<sup>†</sup>, Taichi Kurogi<sup>†</sup>, Xuemei Wan<sup>‡</sup>, Jane E. Ishmael<sup>‡</sup>,  
Kerry L. McPhail<sup>‡</sup> and Amos B. Smith, III<sup>\*†</sup>

<sup>†</sup>Department of Chemistry, Laboratory for Research on the Structure of Matter, and Monell  
Chemical Senses Center, University of Pennsylvania, Philadelphia, PA 19104, USA

<sup>‡</sup>Department of Pharmaceutical Sciences, Oregon State University, Corvallis, OR 97331, USA

\*smithab@sas.upenn.edu

## Table of Contents

- 1) **Table S1.** Conditions screened for osmium-mediated oxidative cyclization of diol **51** ----- page S3
- 2) **Figure S1.** Comparative analysis of HeLa cell viability in response to synthetic compounds ----- page S3
- 3) **Figure S2.** Analysis of the biological activity of alkyne-tagged and biotin-tagged mandelalide A analogs----- page S4
- 4)  $^1\text{H-NMR}$  and  $^{13}\text{C-NMR}$  spectra of synthetic compounds ----- page S5

**Table S1. Conditions screened for osmium-mediated oxidative cyclization of diol 51**

(conditions that provided the best results are highlighted)

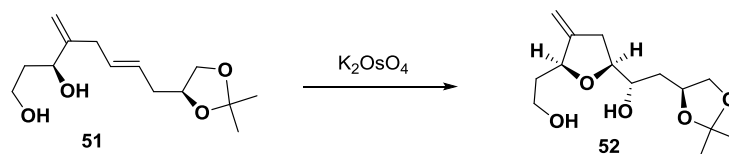

|                                                  |                                         |                                                                                    |                                 |
|--------------------------------------------------|-----------------------------------------|------------------------------------------------------------------------------------|---------------------------------|
| <b>Solvent mixture:</b> acetone:H <sub>2</sub> O | <b>Acid:</b> <b>Cu(OTf)<sub>2</sub></b> | <b>Oxidant:</b> <b>pyridine-N-Oxide (PNO)</b>                                      | <b>Temp.:</b> <b>room temp.</b> |
| acetone:pH 5 buffer                              | Zn(OTf) <sub>2</sub>                    | 4-nitropyridine-N-Oxide                                                            | 40°C                            |
| acetone:pH 6.5 buffer                            | Sc(OTf) <sub>3</sub>                    |                                                                                    | 60°C                            |
| MeCN:H <sub>2</sub> O                            | Al(OTf) <sub>3</sub>                    |                                                                                    | 90°C                            |
| MeCN:pH 4 buffer                                 | CSA                                     | <b>Additive:</b> <b>citric acid</b>                                                | <b>Conc.:</b> 0.1M              |
| MeCN:pH 5 buffer                                 | TFA                                     | 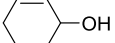 | 0.04 M                          |
| <b>MeCN:pH 6.5 buffer</b>                        |                                         |                                                                                    | <b>0.02 M</b>                   |

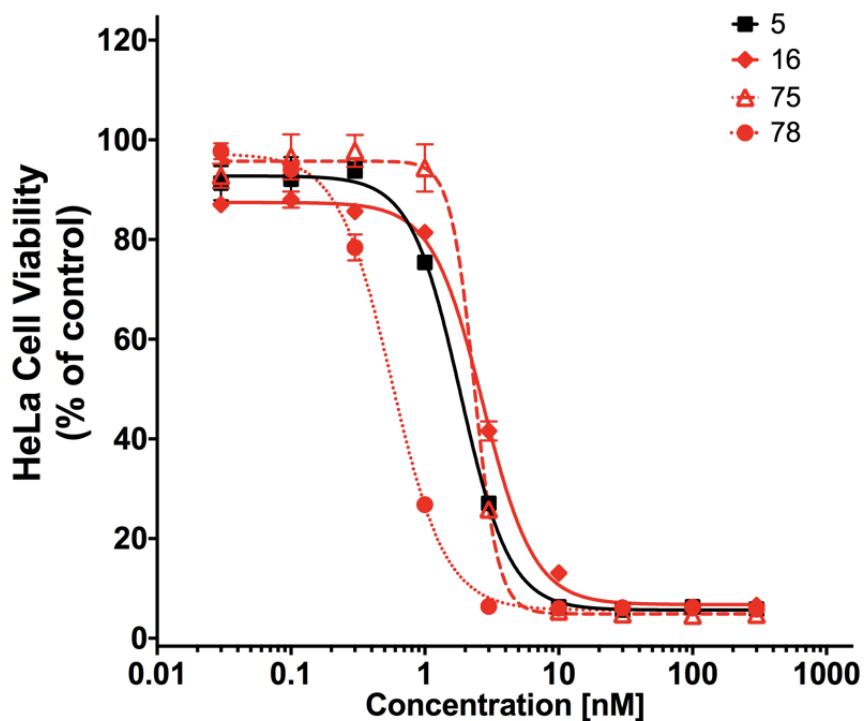

**Figure S1. Comparative analysis of HeLa cell viability in response to synthetic compounds.**

Concentration-response profiles for synthetic mandelalide compounds against human HeLa cervical cells. Cells were seeded at 10,000 cells per well and exposed to increasing concentrations (0.03–300 nM) of each compound or vehicle (0.1% DMSO) in triplicate for 72 h. Cell viability was determined by MTT assay with the viability of vehicle-treated cells defined as 100%. Graphs represent mean viability  $\pm$  SE (n = 3 wells per treatment) from a representative comparison that was repeated in at least three independent experiments.

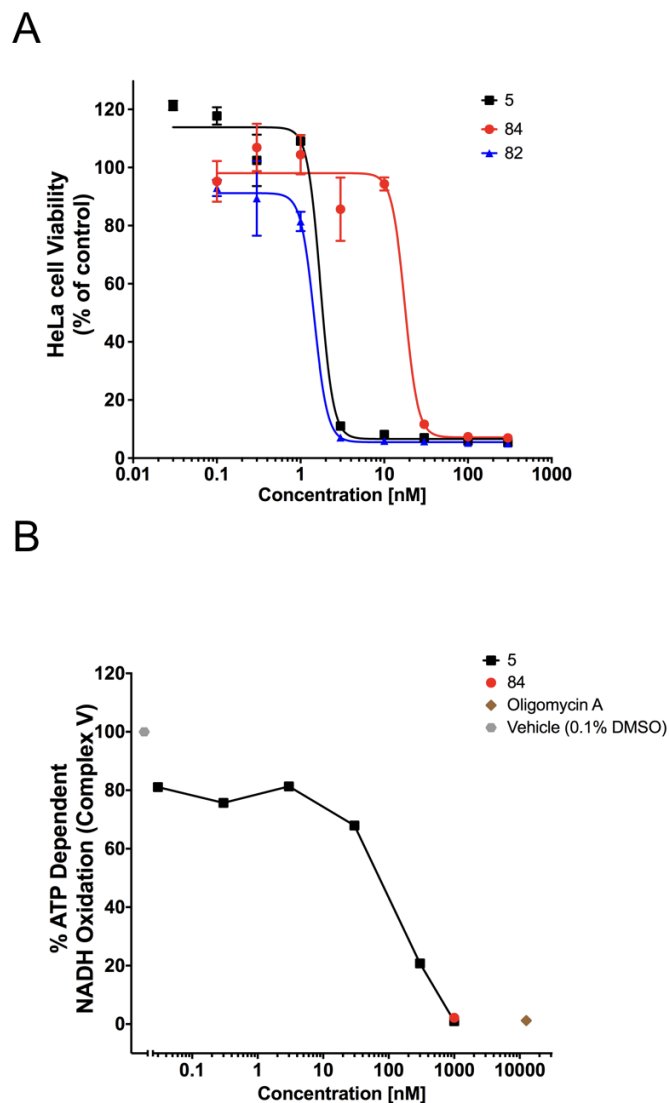

**Figure S2. Analysis of the biological activity of alkyne-tagged and biotin-tagged mandelalide A analogs.**

(A) Concentration-response profiles for (–)- mandelalide A (**5**), with alkyne (**82**) or biotin (**84**) tag at C<sub>24</sub> against human HeLa cervical cells. Cells were seeded at 10,000 cells per well and exposed to increasing concentrations of each compound or vehicle (0.1% DMSO) in triplicate for 72 h. Cell viability was determined by MTT assay with the viability of vehicle-treated cells defined as 100%.

(B) Biotin-tagged mandelalide A (**84**) inhibits complex V activity in isolated mitochondria. The % rate of ATP-dependent NADH oxidation was calculated from a series of time- dependent reactions carried out in the presence of **84** or increasing concentrations of **5** using isolated mitochondria from bovine heart as the source of complex V ATP synthase activity. A saturating concentration of oligomycin A (12.5  $\mu$ M) was used as a control inhibitor of complex V.

## **$^1\text{H}$ -NMR and $^{13}\text{C}$ -NMR spectra of synthetic compounds**

The 500 MHz  $^1\text{H-NMR}$  Spectrum of Compound **25b** in  $\text{CDCl}_3$

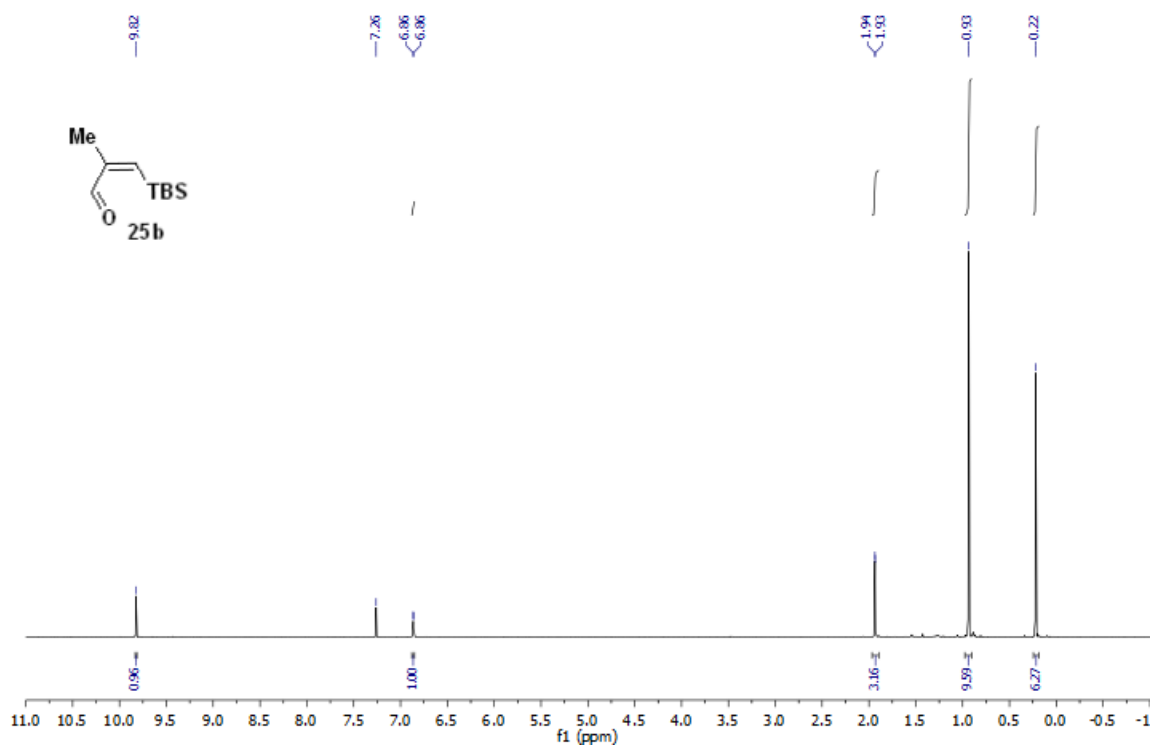

The 125 MHz  $^{13}\text{C-NMR}$  Spectrum of Compound **25b** in  $\text{CDCl}_3$

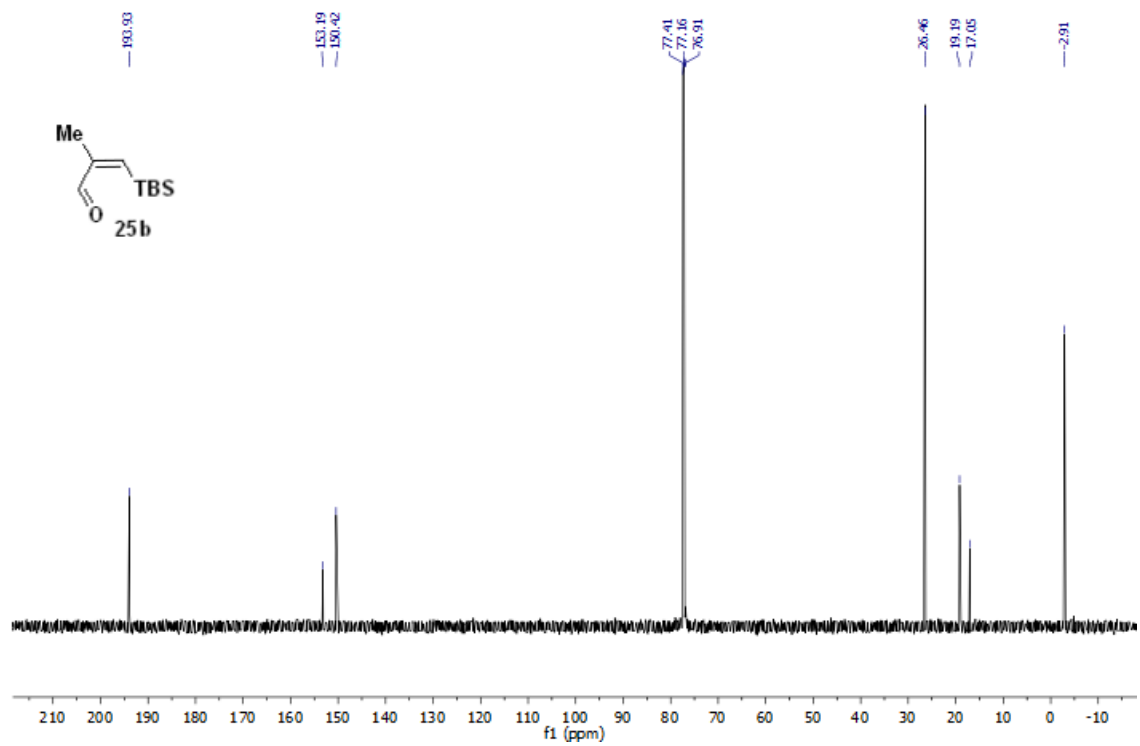

The 500 MHz  $^1\text{H-NMR}$  Spectrum of Compound **25a** in  $\text{CDCl}_3$

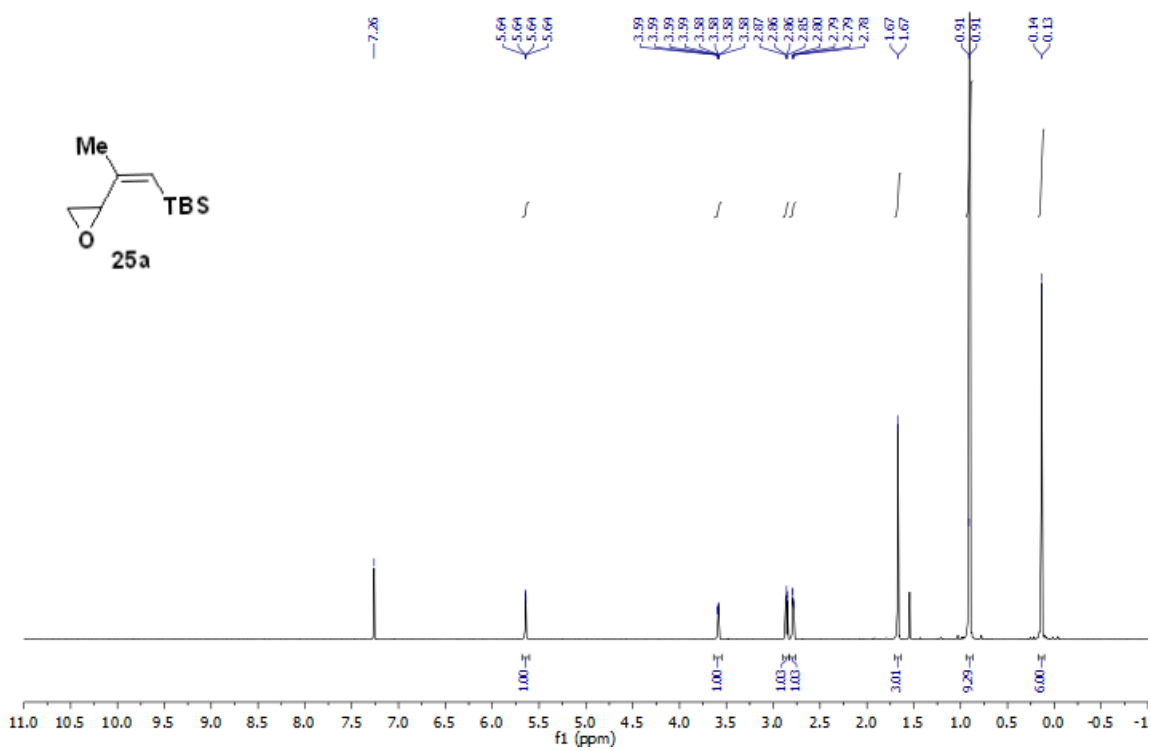

The 125 MHz  $^{13}\text{C-NMR}$  Spectrum of Compound **25a** in  $\text{CDCl}_3$

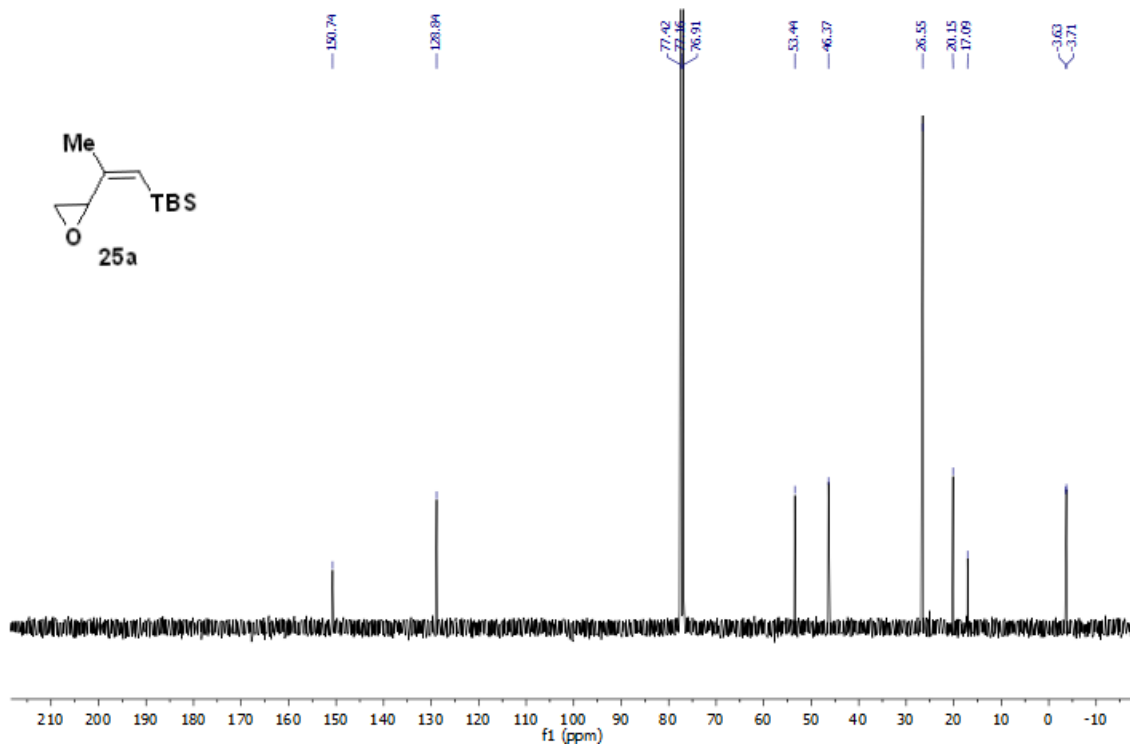

The 500 MHz  $^1\text{H}$ -NMR Spectrum of Compound **47a** in  $\text{CDCl}_3$

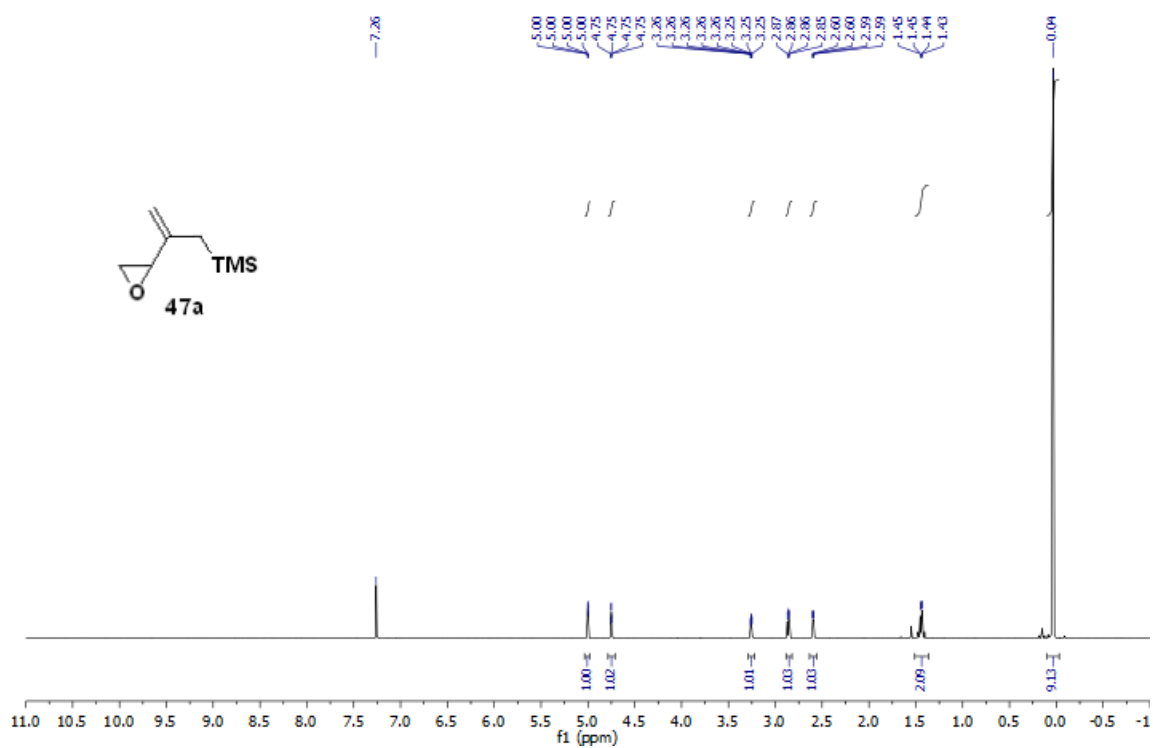

The 125 MHz  $^{13}\text{C}$ -NMR Spectrum of Compound **47a** in  $\text{CDCl}_3$

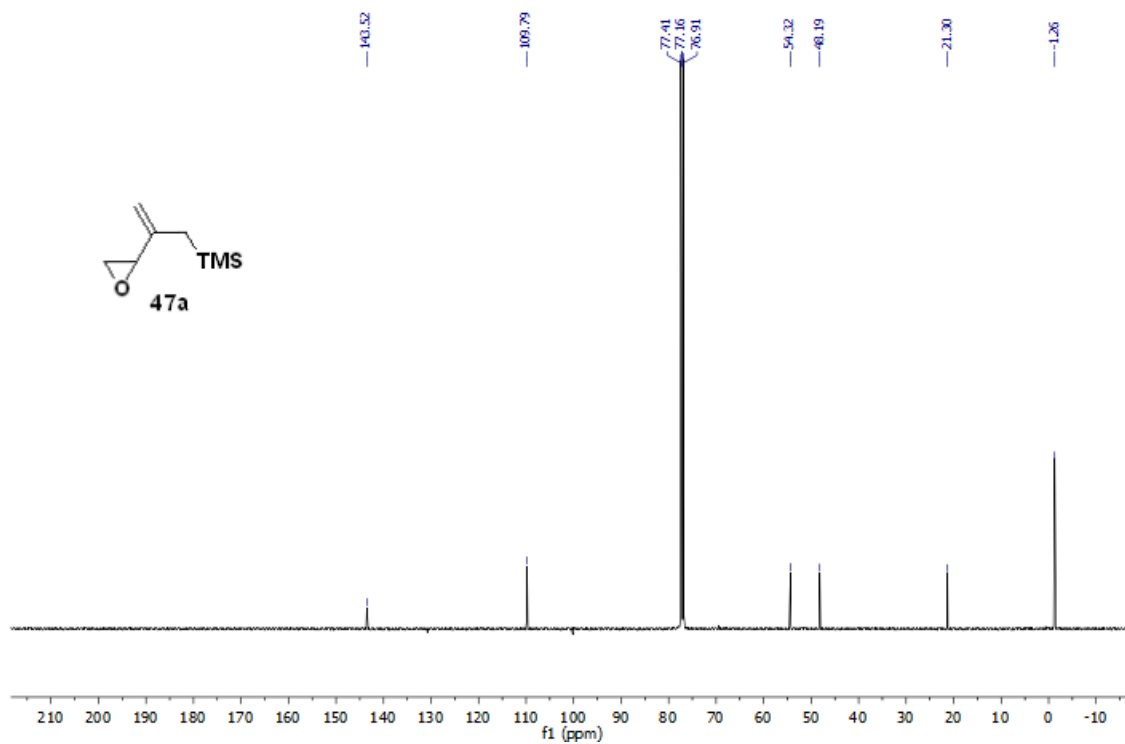





The 500 MHz  $^1\text{H}$ -NMR Spectrum of Compound **36** in  $\text{CDCl}_3$

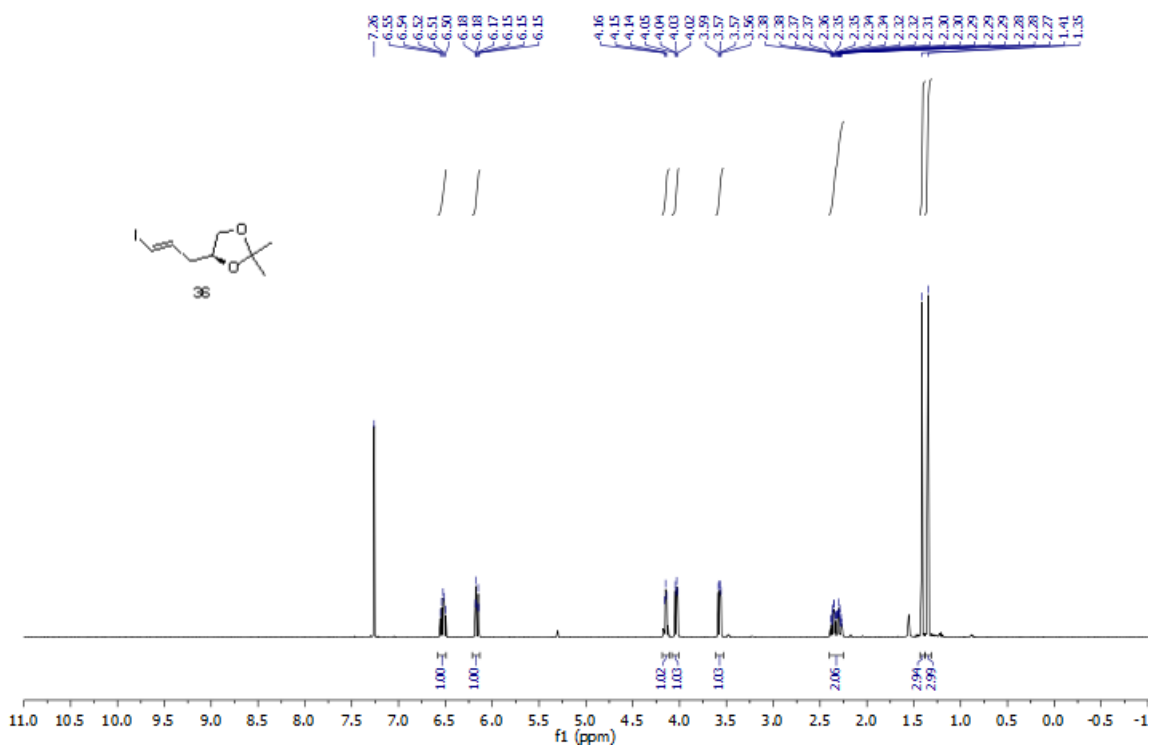

The 125 MHz  $^{13}\text{C}$ -NMR Spectrum of Compound **36** in  $\text{CDCl}_3$

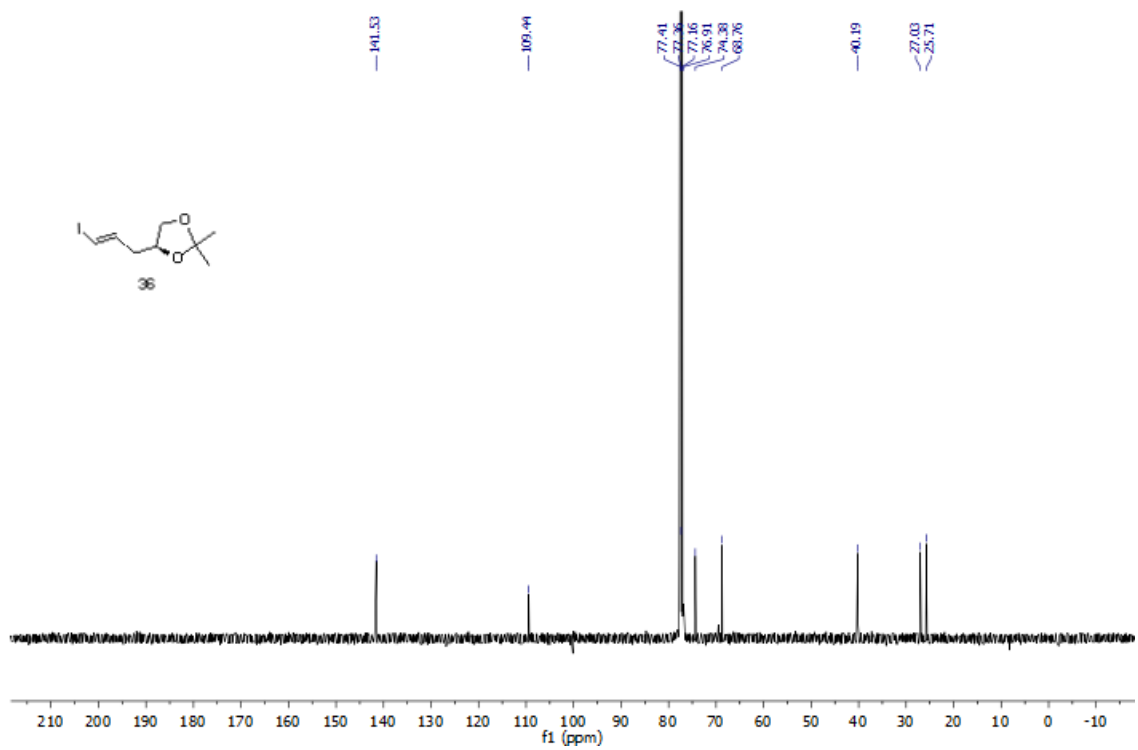

The 500 MHz <sup>1</sup>H-NMR Spectrum of Compound **28b1** in CDCl<sub>3</sub>

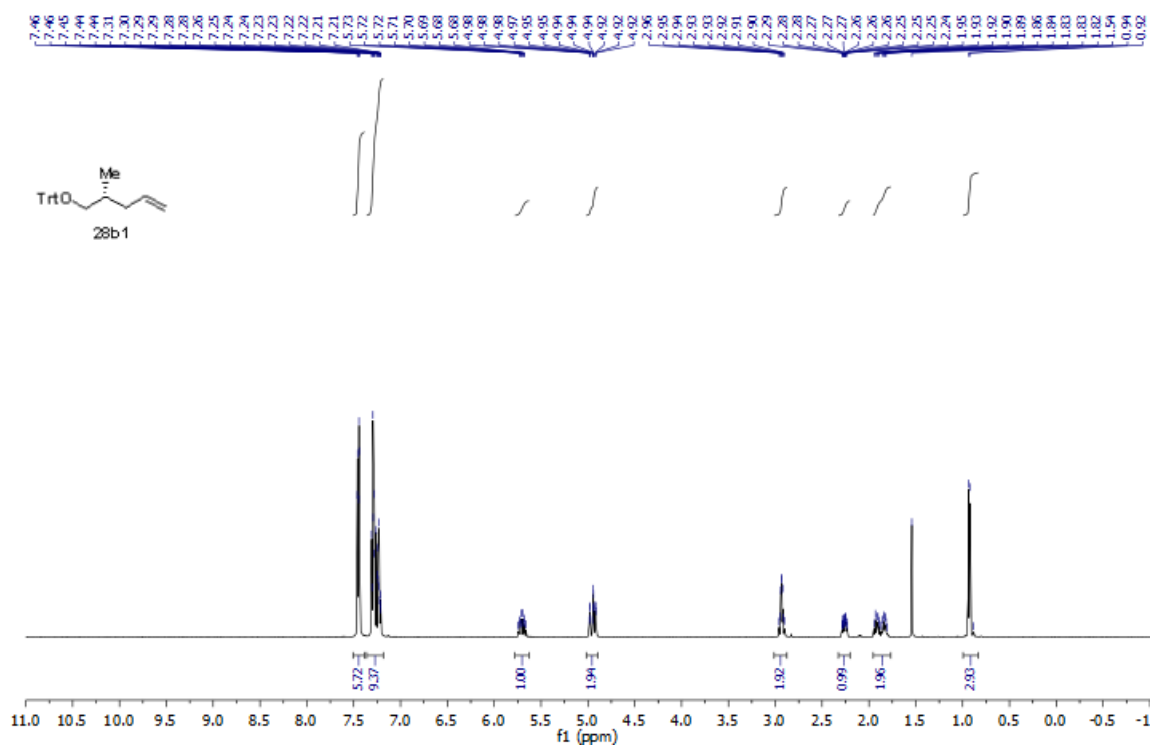

The 125 MHz <sup>13</sup>C-NMR Spectrum of Compound **28b1** in CDCl<sub>3</sub>

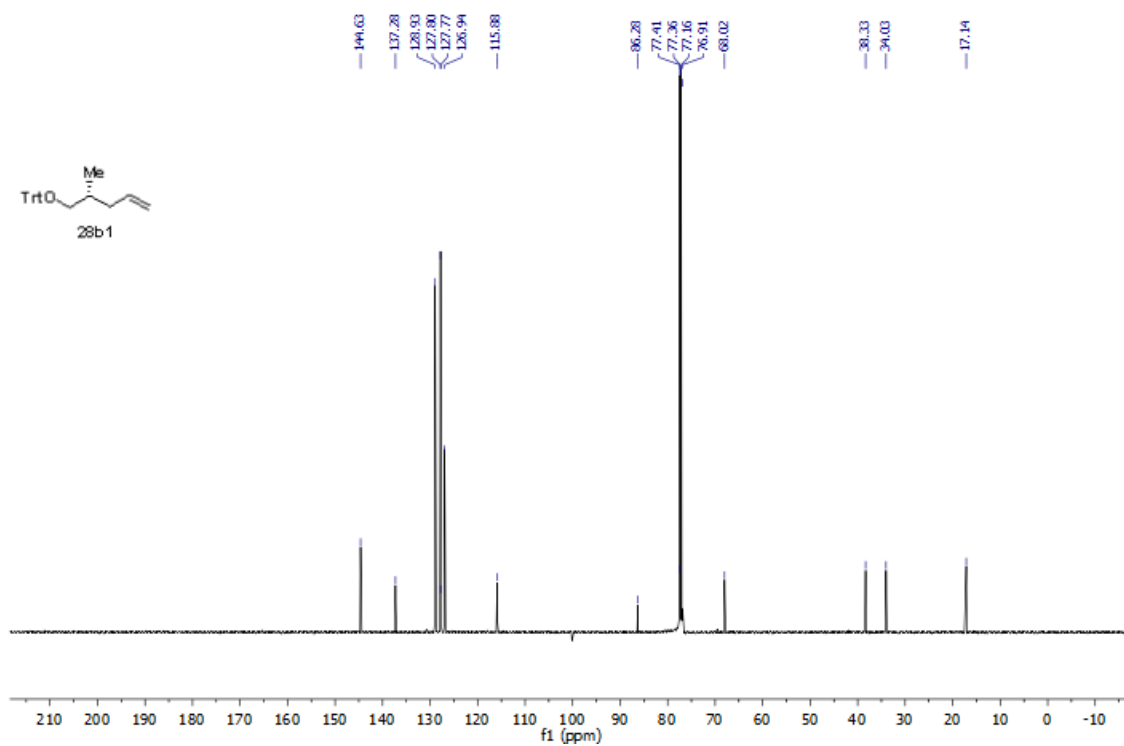

The 500 MHz  $^1\text{H}$ -NMR Spectrum of Compound **28a** in  $\text{CDCl}_3$

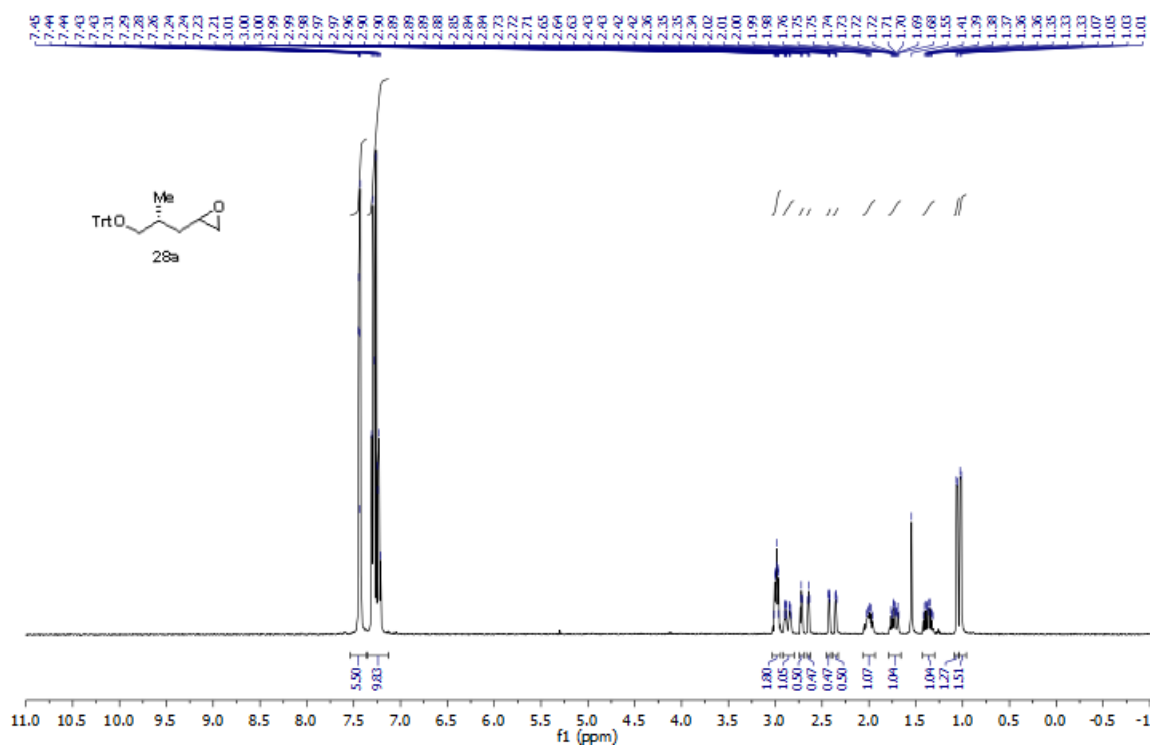

The 125 MHz  $^{13}\text{C}$ -NMR Spectrum of Compound **28a** in  $\text{CDCl}_3$

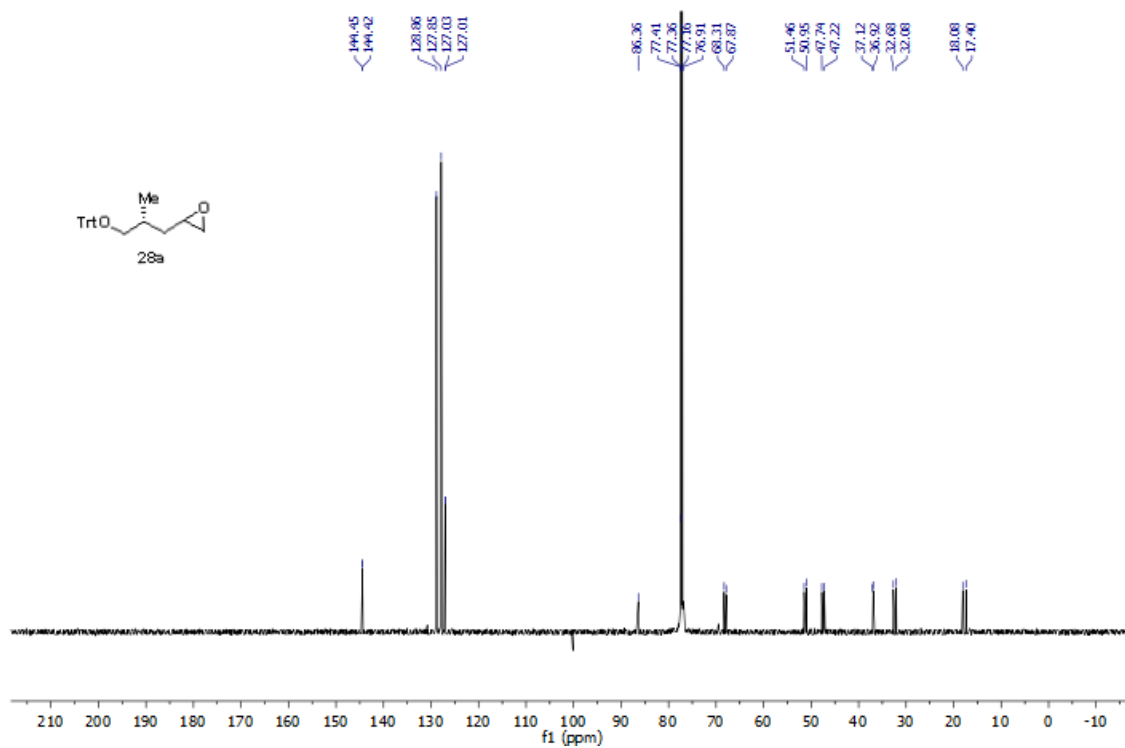

The 500 MHz  $^1\text{H}$ -NMR Spectrum of Compound **28** in  $\text{CDCl}_3$

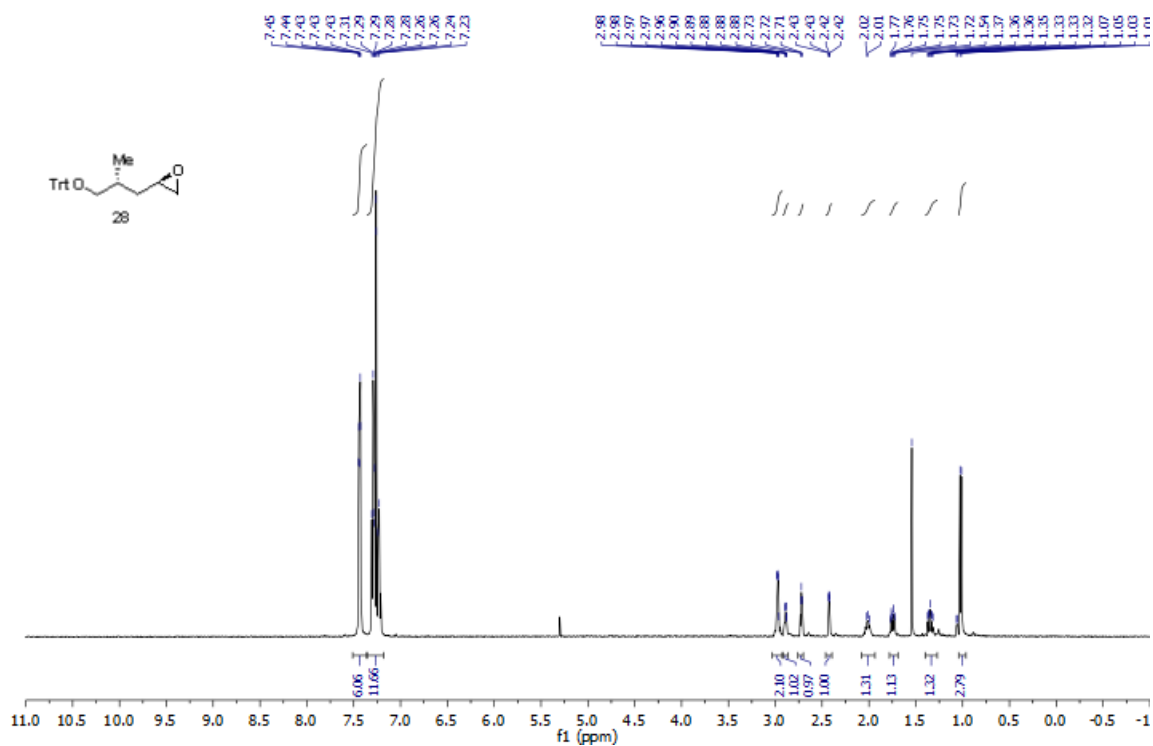

The 125 MHz  $^{13}\text{C}$ -NMR Spectrum of Compound **28** in  $\text{CDCl}_3$

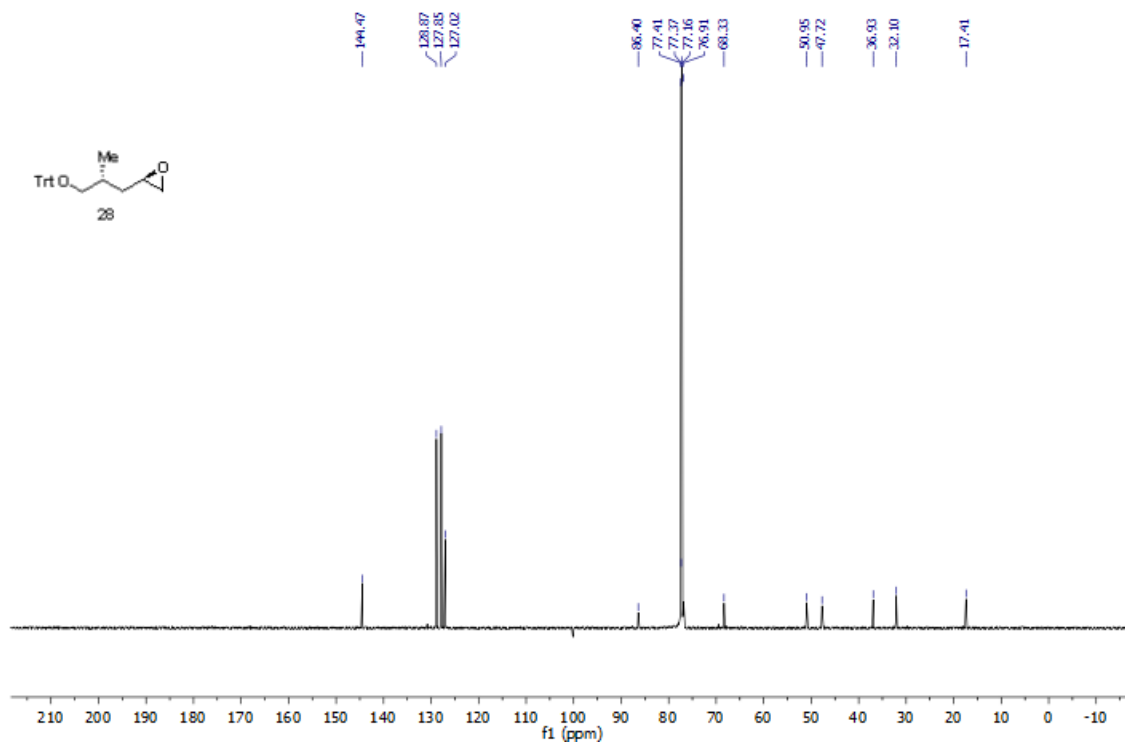

The 500 MHz  $^1\text{H-NMR}$  Spectrum of Compound **22** in  $\text{CDCl}_3$

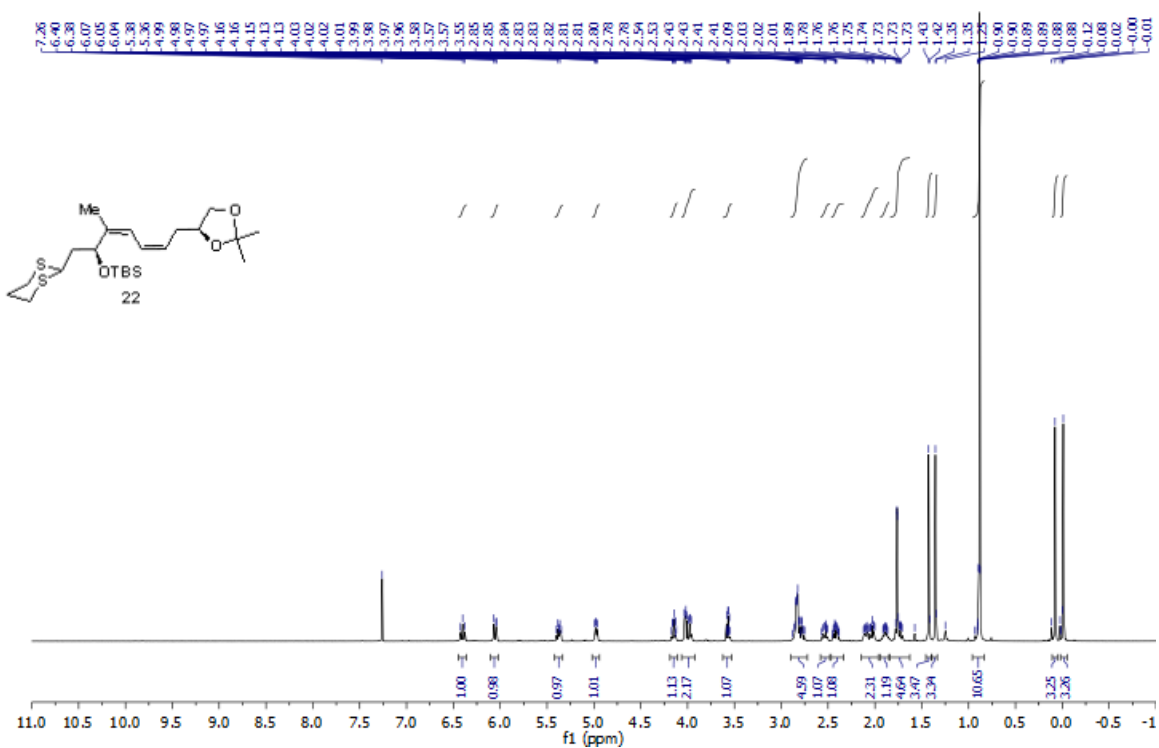

The 125 MHz  $^{13}\text{C-NMR}$  Spectrum of Compound **22** in  $\text{CDCl}_3$

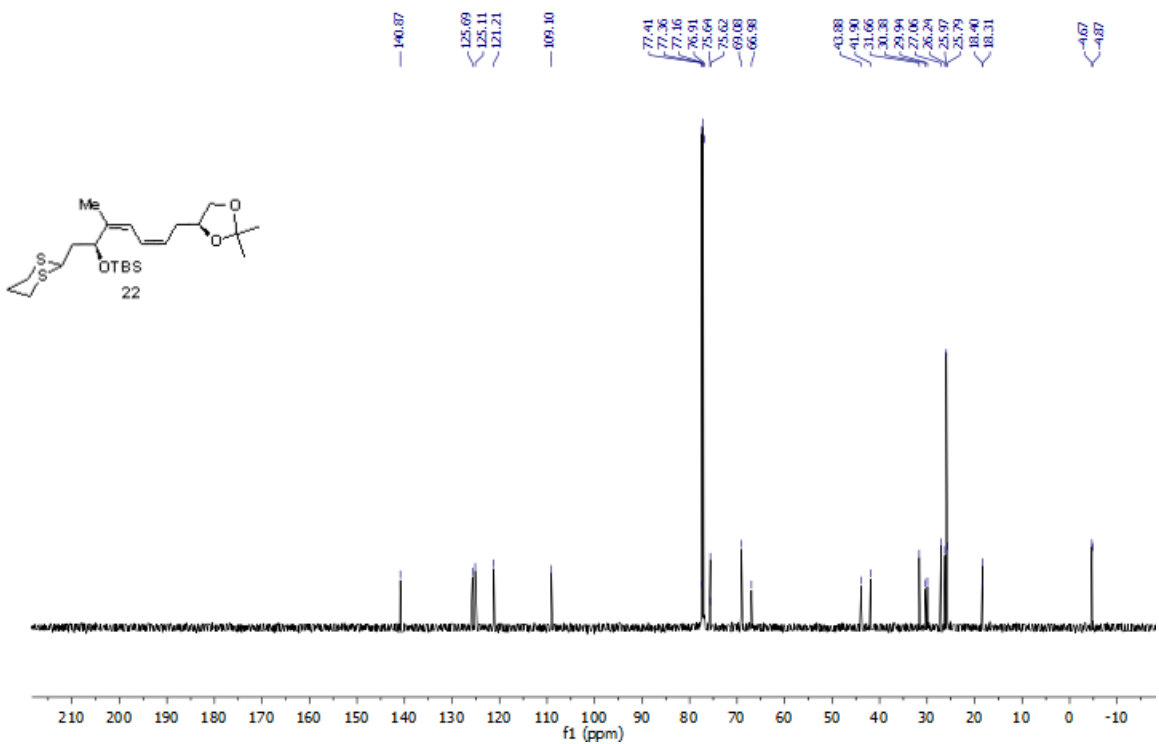

The 500 MHz  $^1\text{H-NMR}$  Spectrum of Compound **37** in  $\text{CDCl}_3$

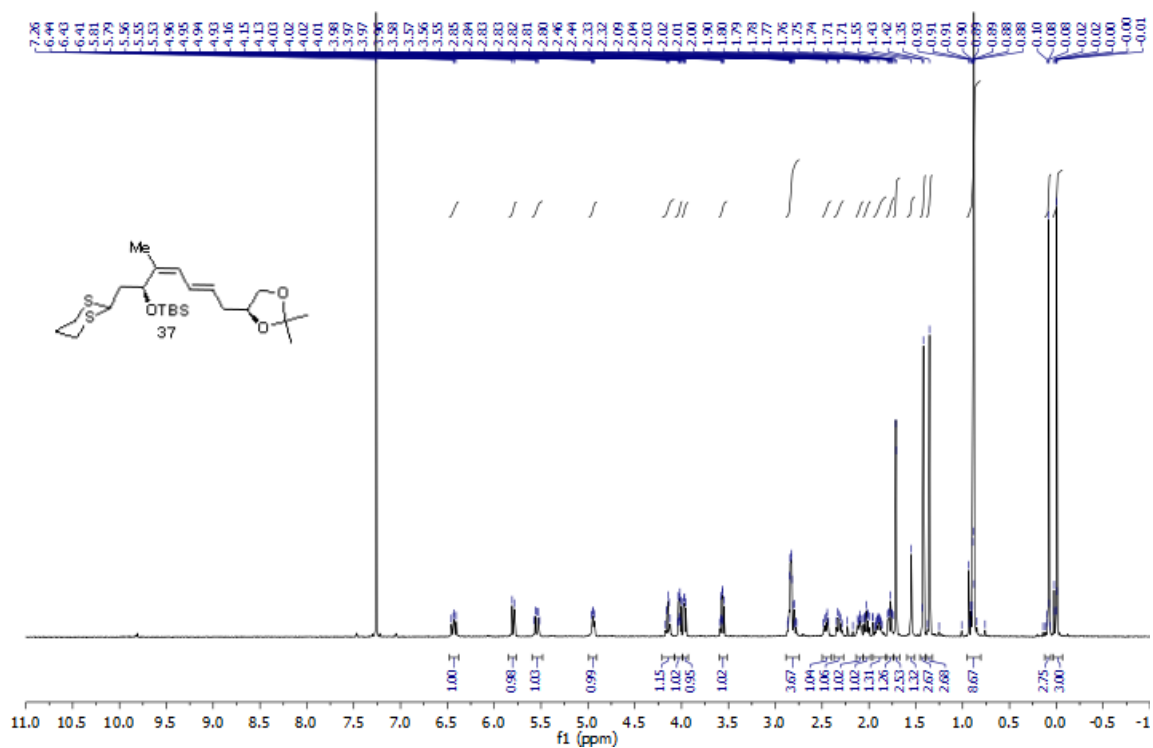

The 125 MHz  $^{13}\text{C-NMR}$  Spectrum of Compound **37** in  $\text{CDCl}_3$

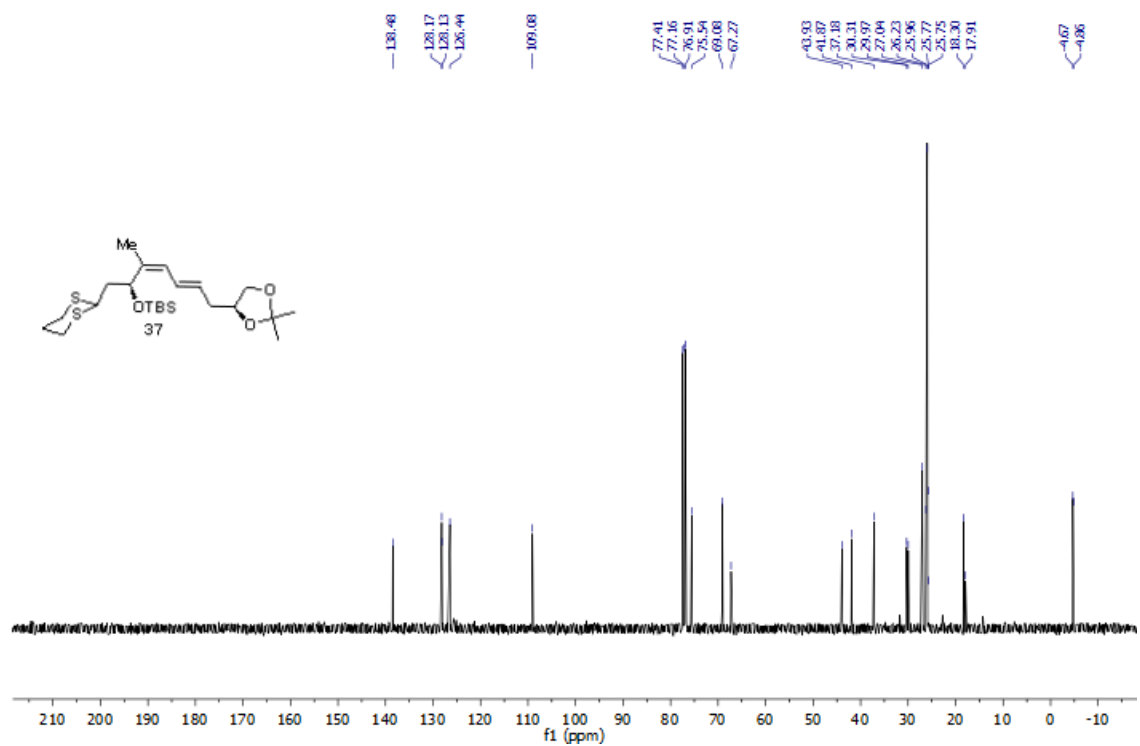

The 500 MHz  $^1\text{H-NMR}$  Spectrum of Compound **50** in  $\text{CDCl}_3$

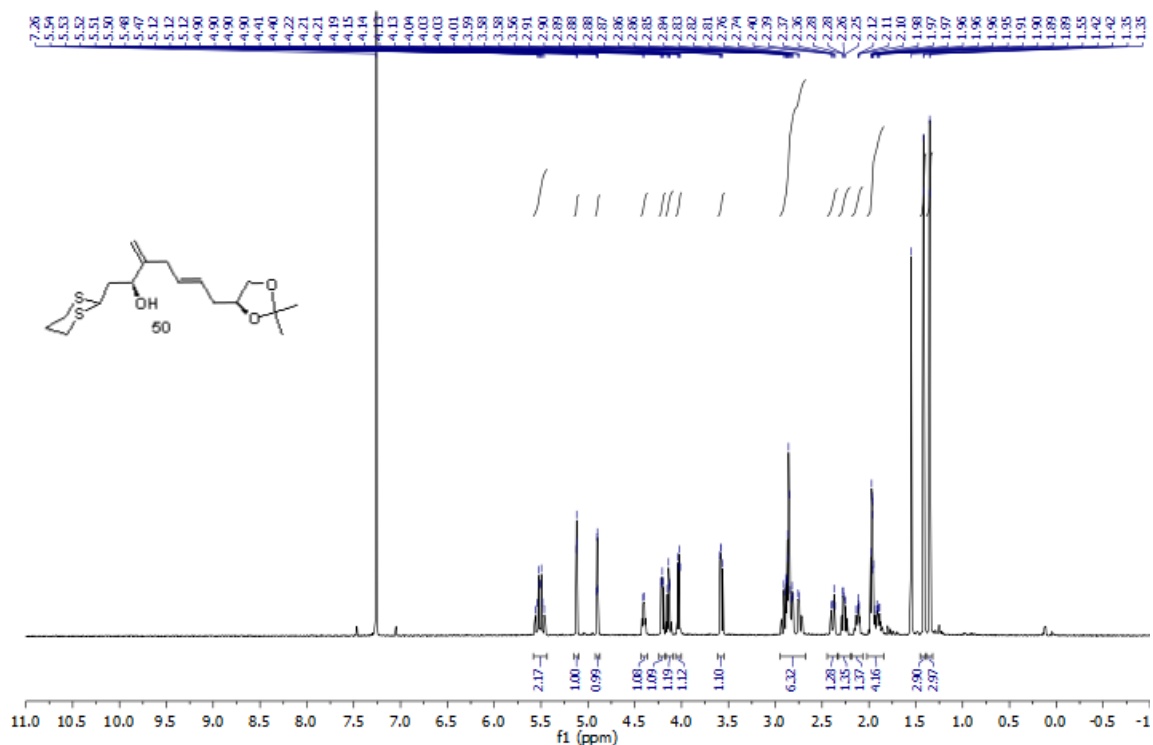

The 125 MHz  $^{13}\text{C-NMR}$  Spectrum of Compound **50** in  $\text{CDCl}_3$

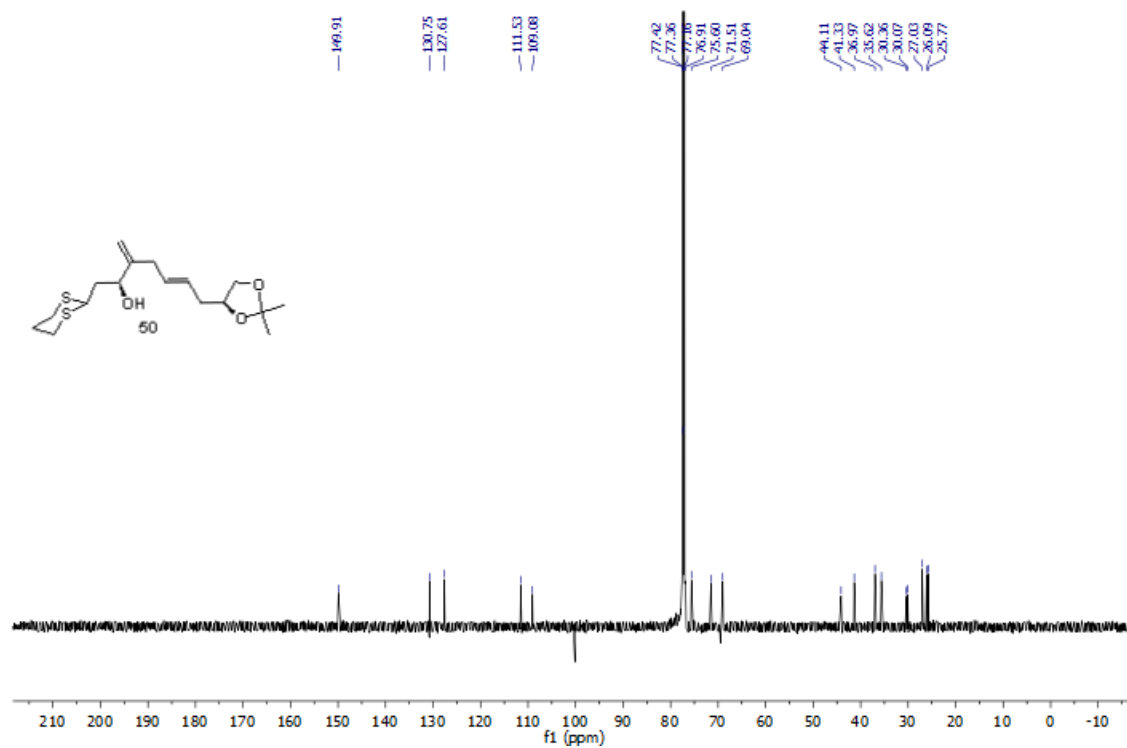



The 500 MHz <sup>1</sup>H-NMR Spectrum of Compound **23** in CDCl<sub>3</sub>

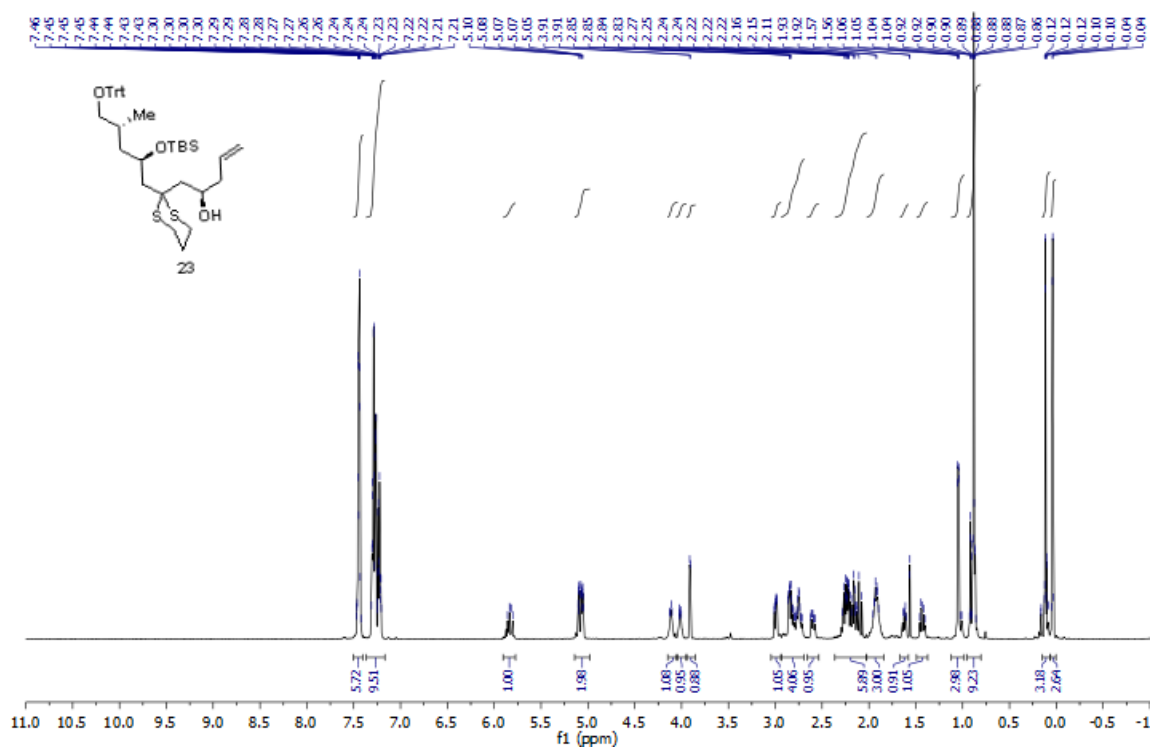

The 125 MHz <sup>13</sup>C-NMR Spectrum of Compound **23** in CDCl<sub>3</sub>

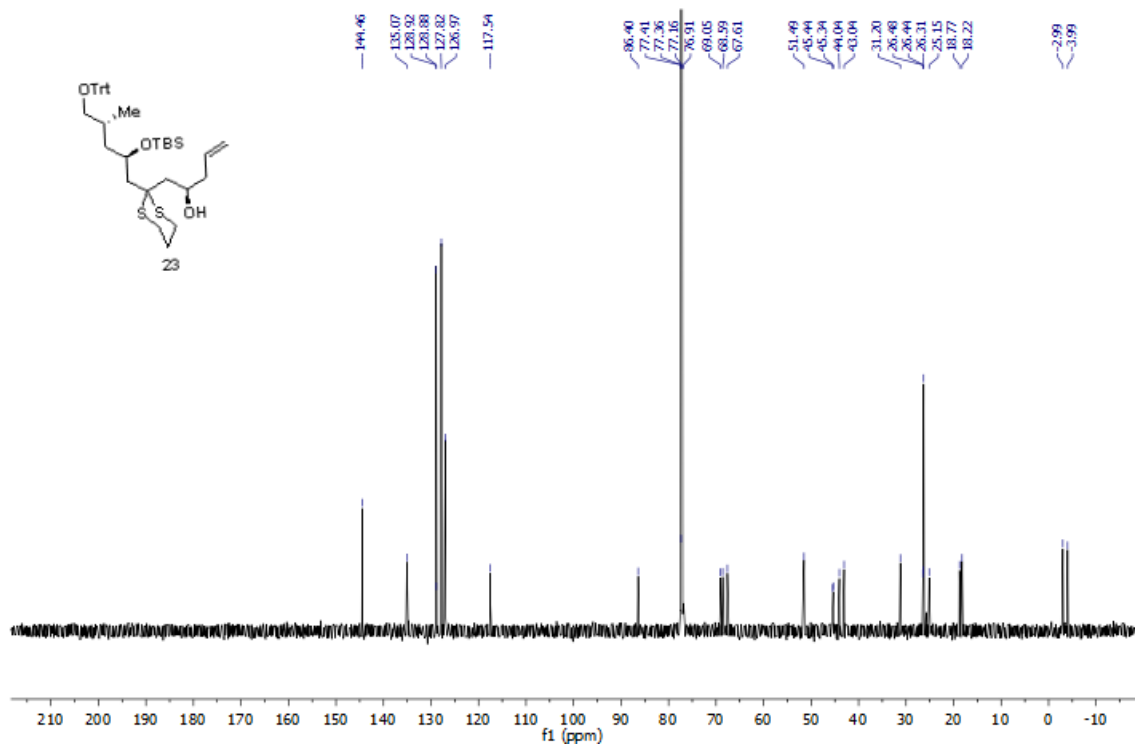

The 500 MHz  $^1\text{H-NMR}$  Spectrum of Compound **34** in  $\text{CDCl}_3$

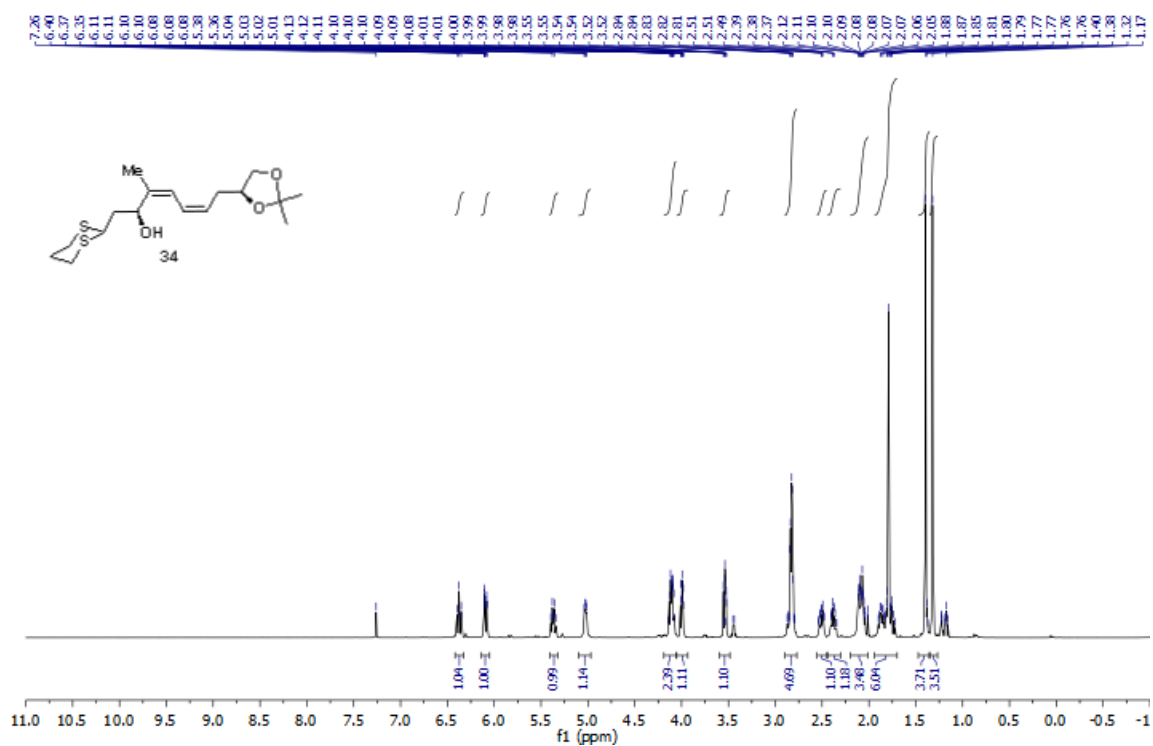

The 125 MHz  $^{13}\text{C-NMR}$  Spectrum of Compound **34** in  $\text{CDCl}_3$

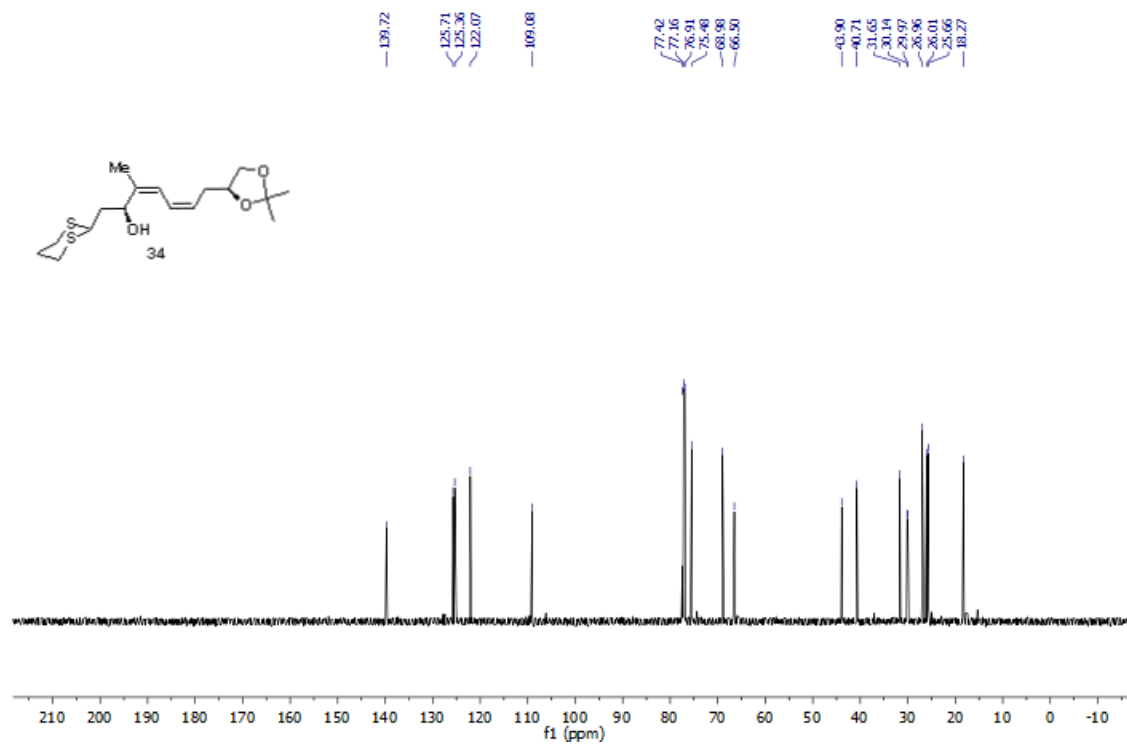

The 500 MHz <sup>1</sup>H-NMR Spectrum of Compound **37a** in CDCl<sub>3</sub>

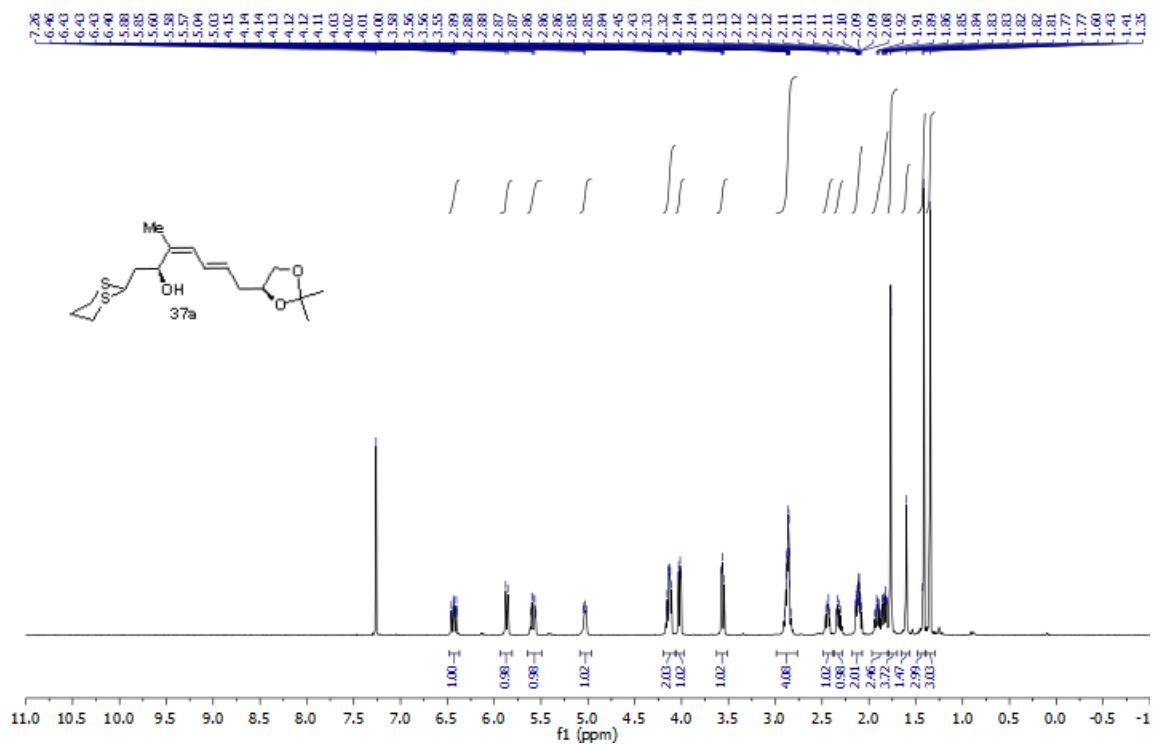

The 125 MHz <sup>13</sup>C-NMR Spectrum of Compound **37a** in CDCl<sub>3</sub>

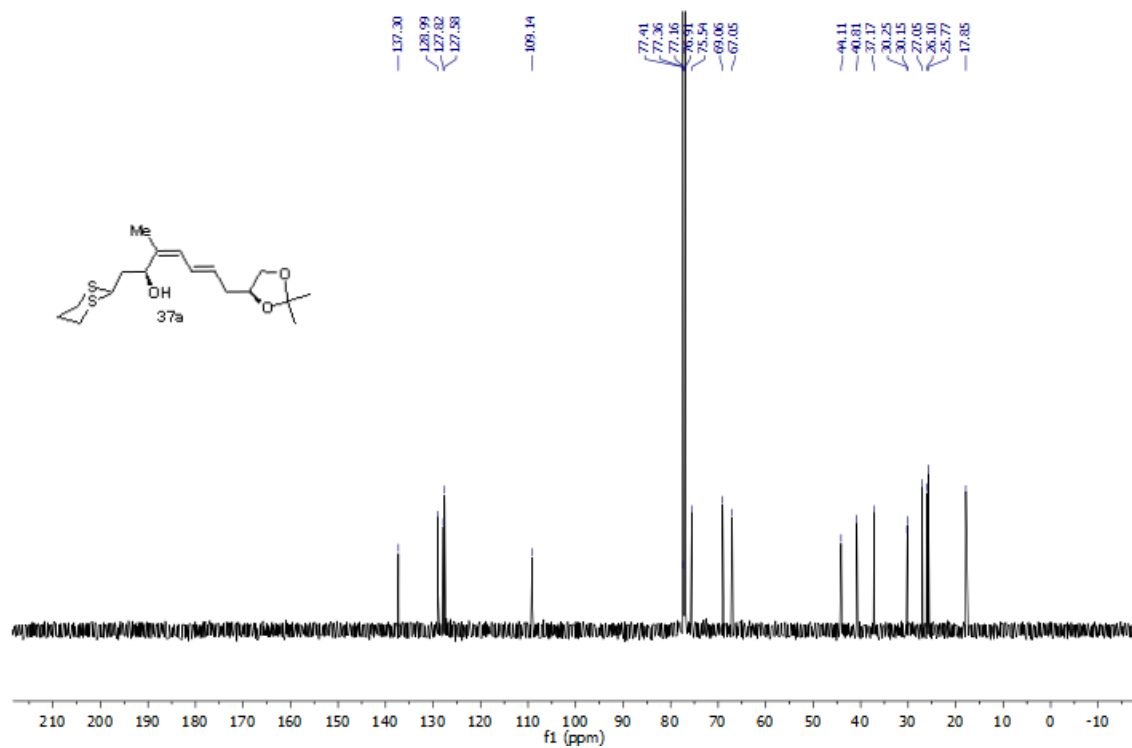

The 500 MHz  $^1\text{H}$ -NMR Spectrum of Compound **38** in  $\text{CDCl}_3$

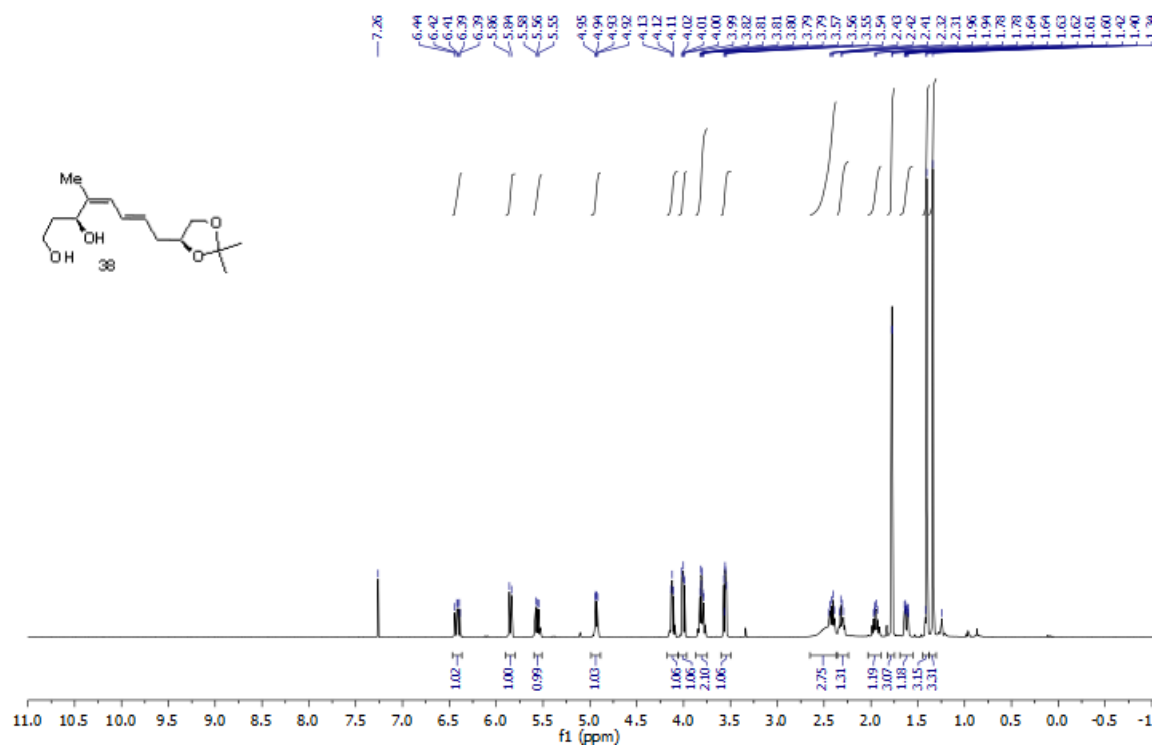

The 125 MHz  $^{13}\text{C}$ -NMR Spectrum of Compound **38** in  $\text{CDCl}_3$

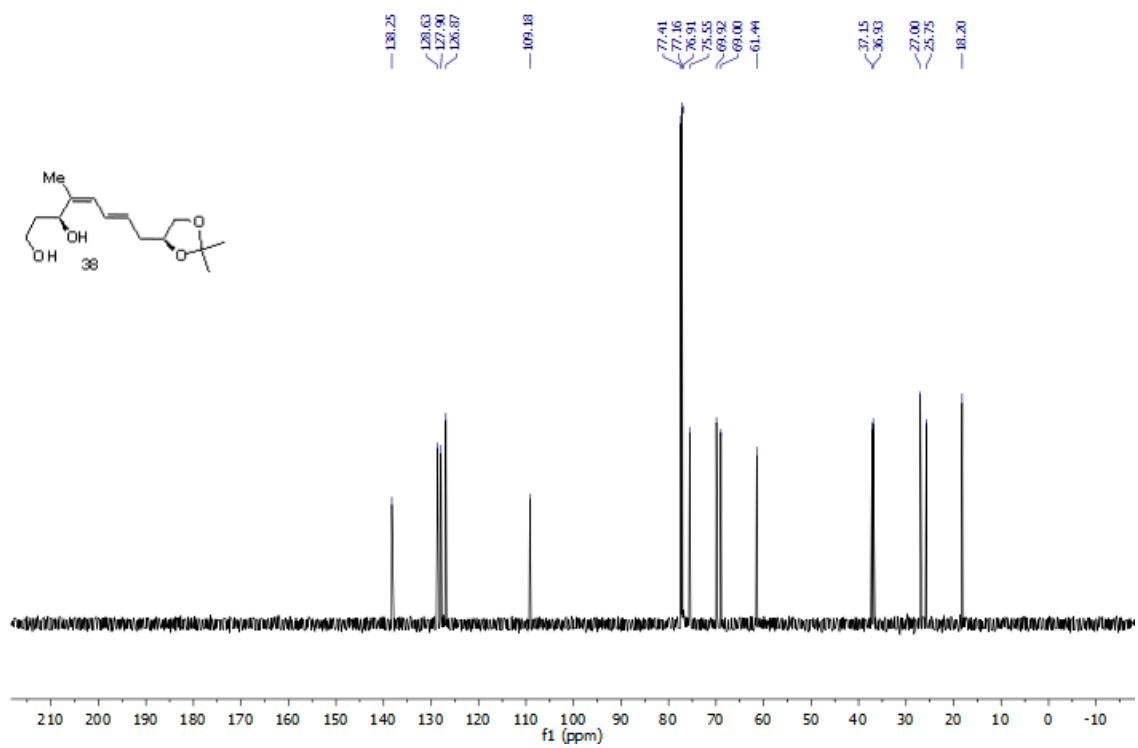

The 500 MHz  $^1\text{H}$ -NMR Spectrum of Compound **51** in  $\text{CDCl}_3$

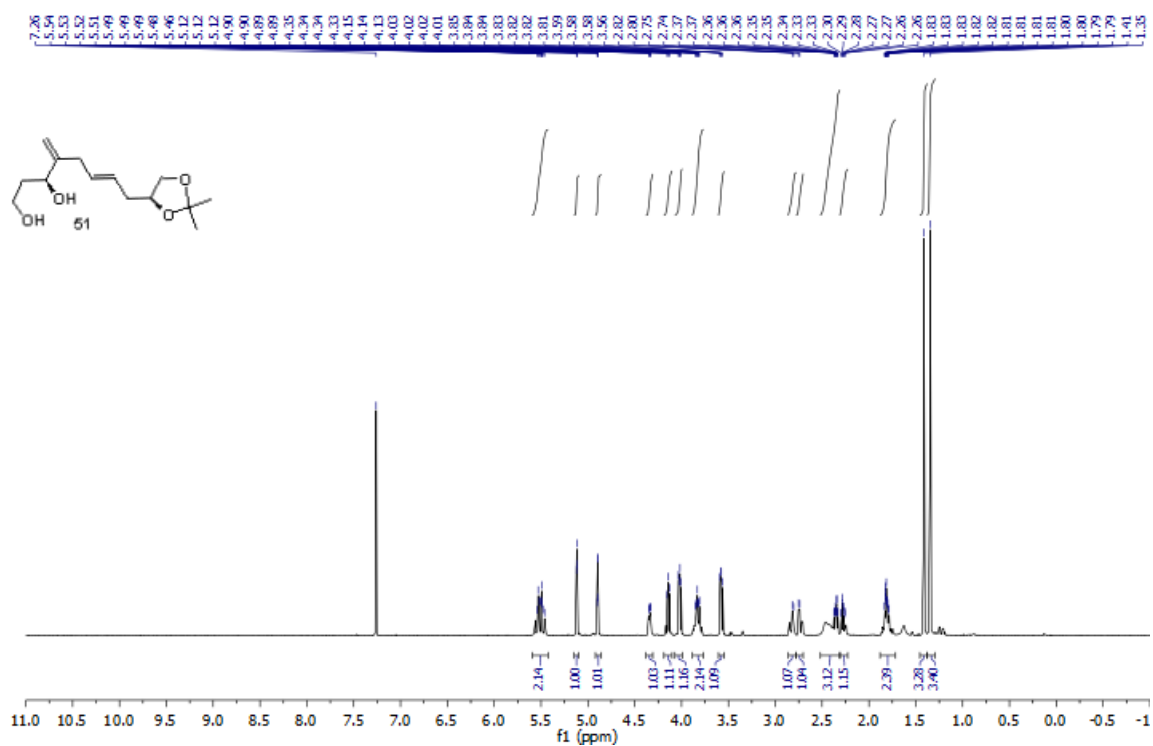

The 125 MHz  $^{13}\text{C}$ -NMR Spectrum of Compound **51** in  $\text{CDCl}_3$

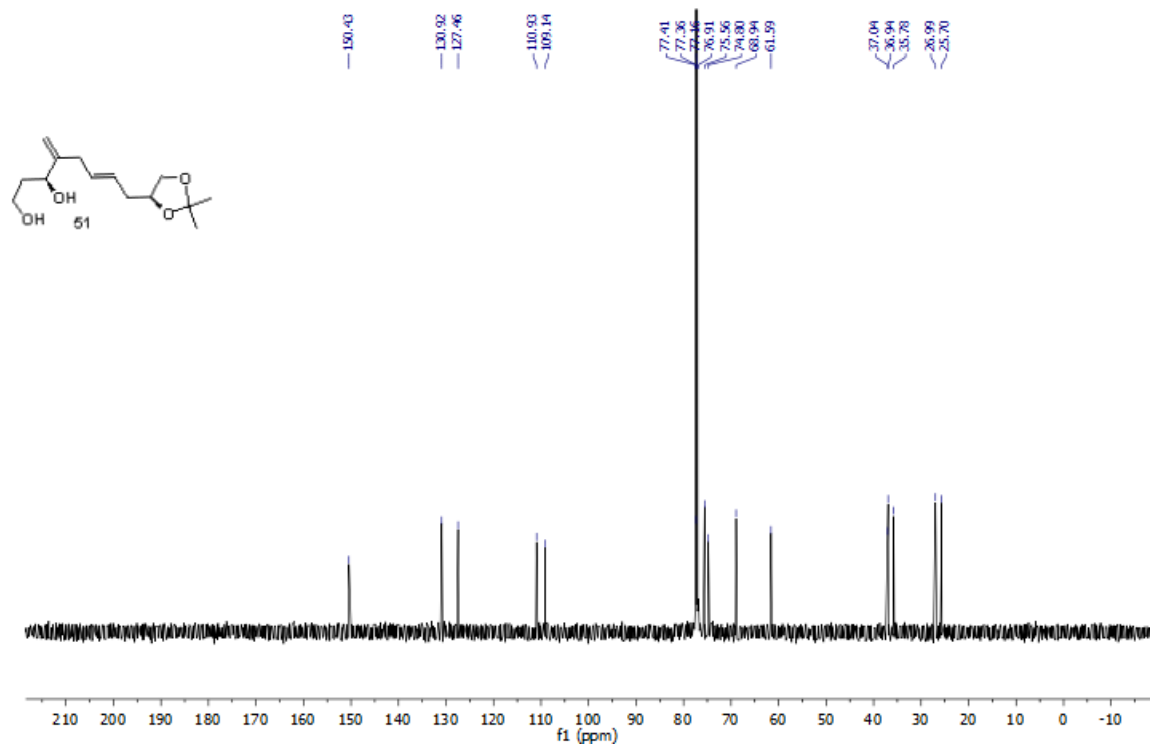

The 500 MHz  $^1\text{H}$ -NMR Spectrum of Compound **52** in  $\text{C}_6\text{D}_6$

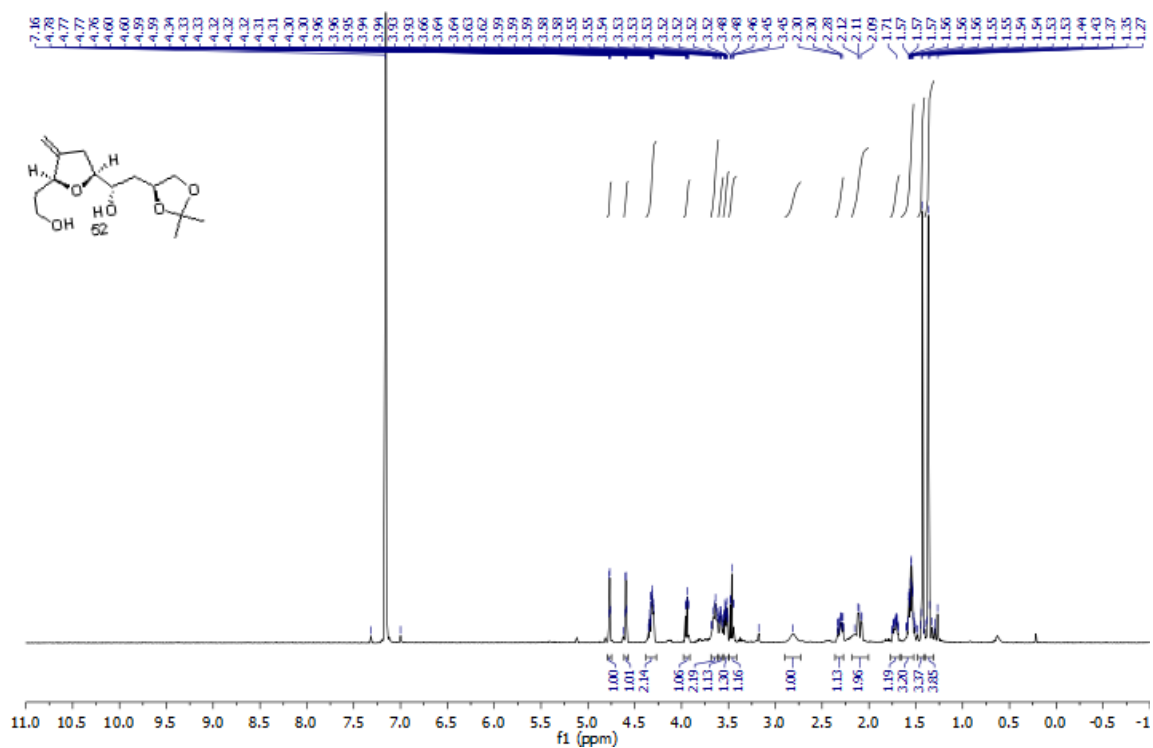

The 125 MHz  $^{13}\text{C}$ -NMR Spectrum of Compound **52** in  $\text{C}_6\text{D}_6$

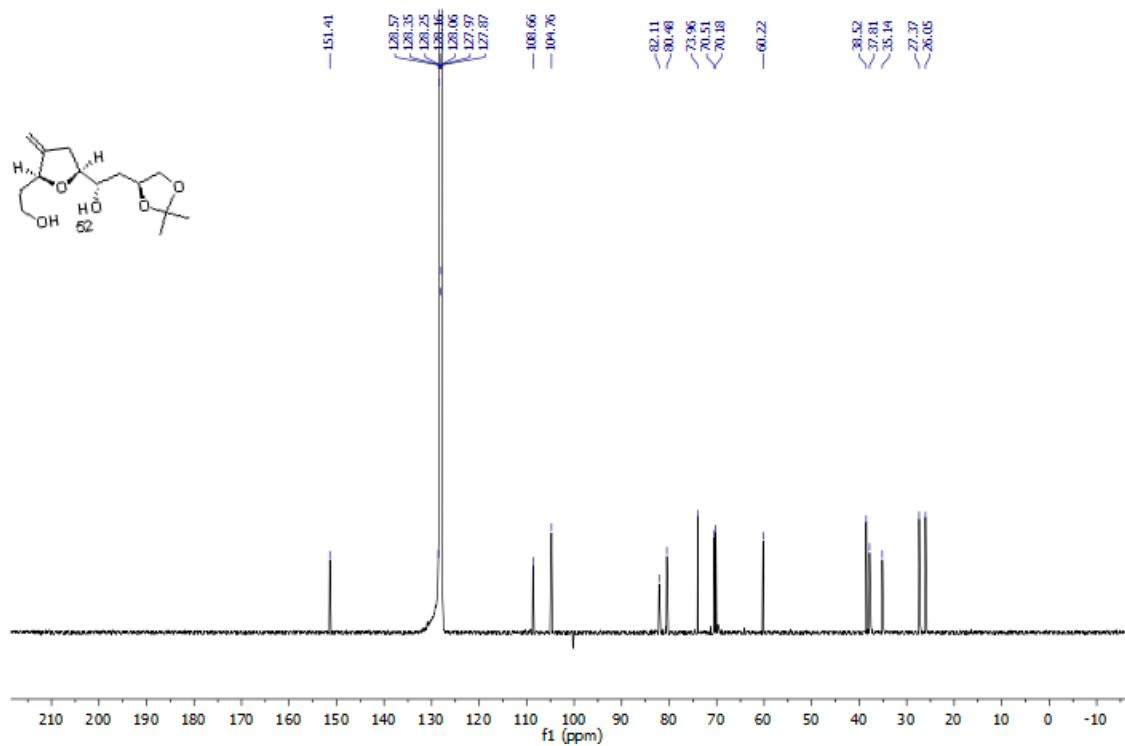

The 500 MHz  $^1\text{H-NMR}$  Spectrum of Compound **52a** in  $\text{C}_6\text{D}_6$

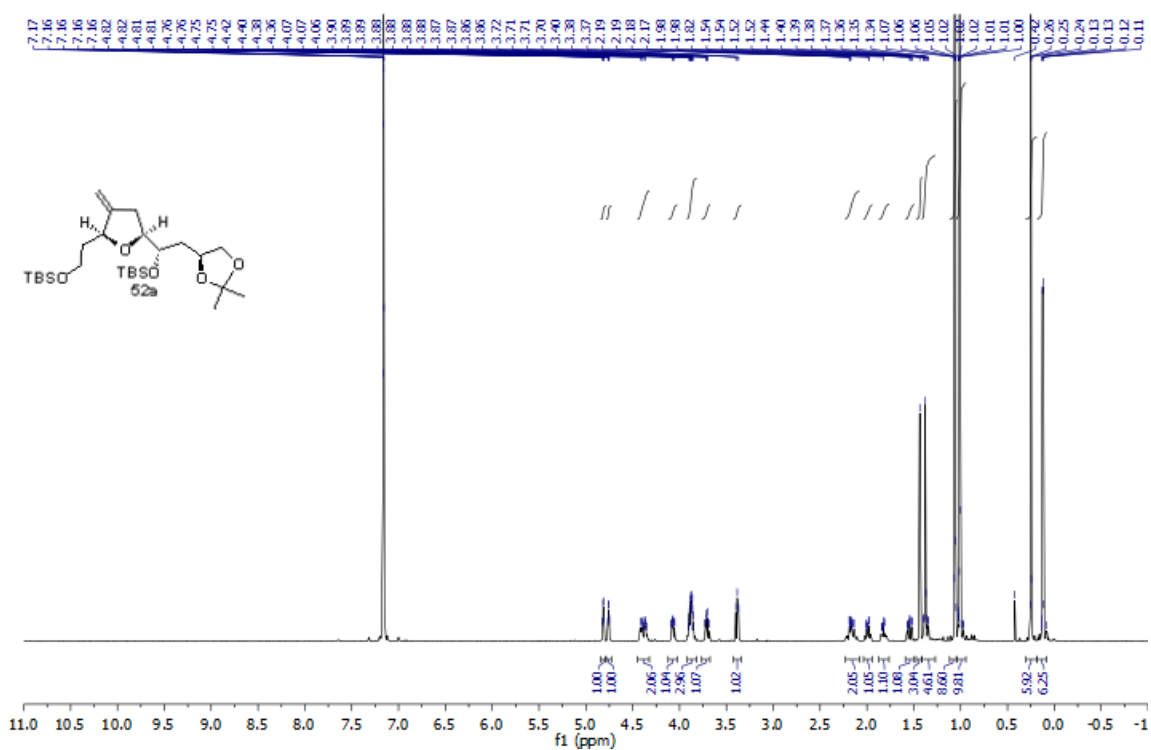

The 125 MHz  $^{13}\text{C-NMR}$  Spectrum of Compound **52a** in  $\text{C}_6\text{D}_6$

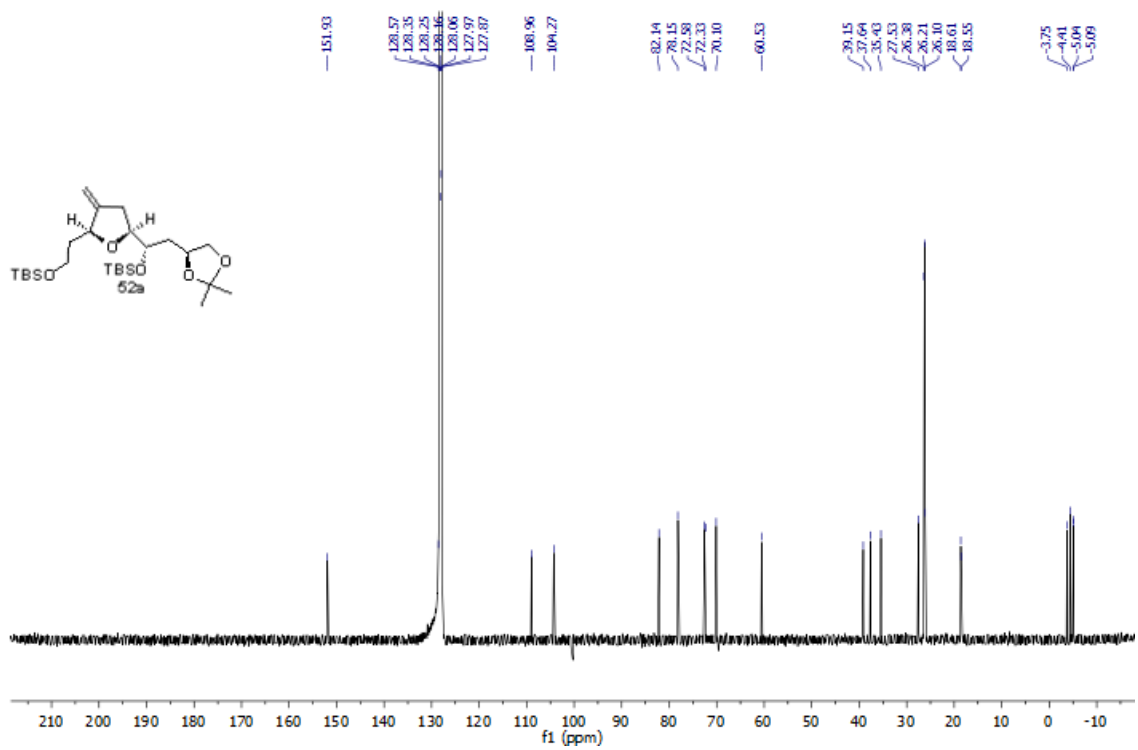

The 500 MHz  $^1\text{H-NMR}$  Spectrum of Compound **53** in  $\text{CDCl}_3$

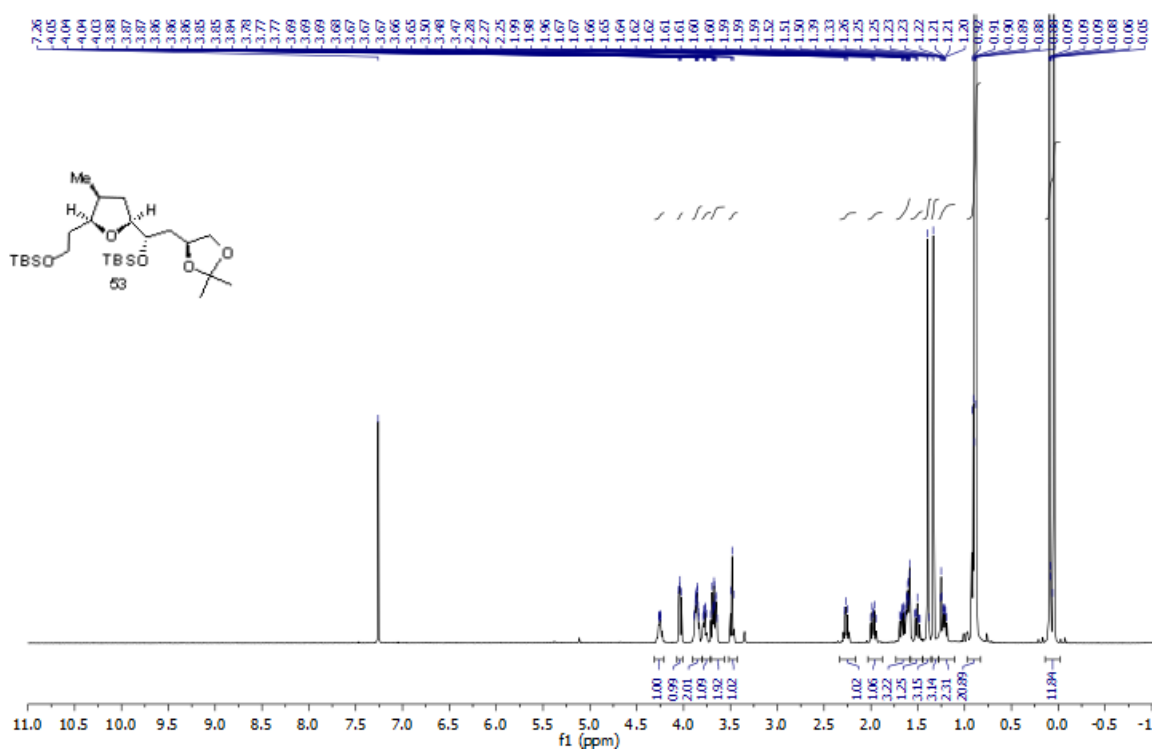

The 125 MHz  $^{13}\text{C-NMR}$  Spectrum of Compound **53** in  $\text{CDCl}_3$

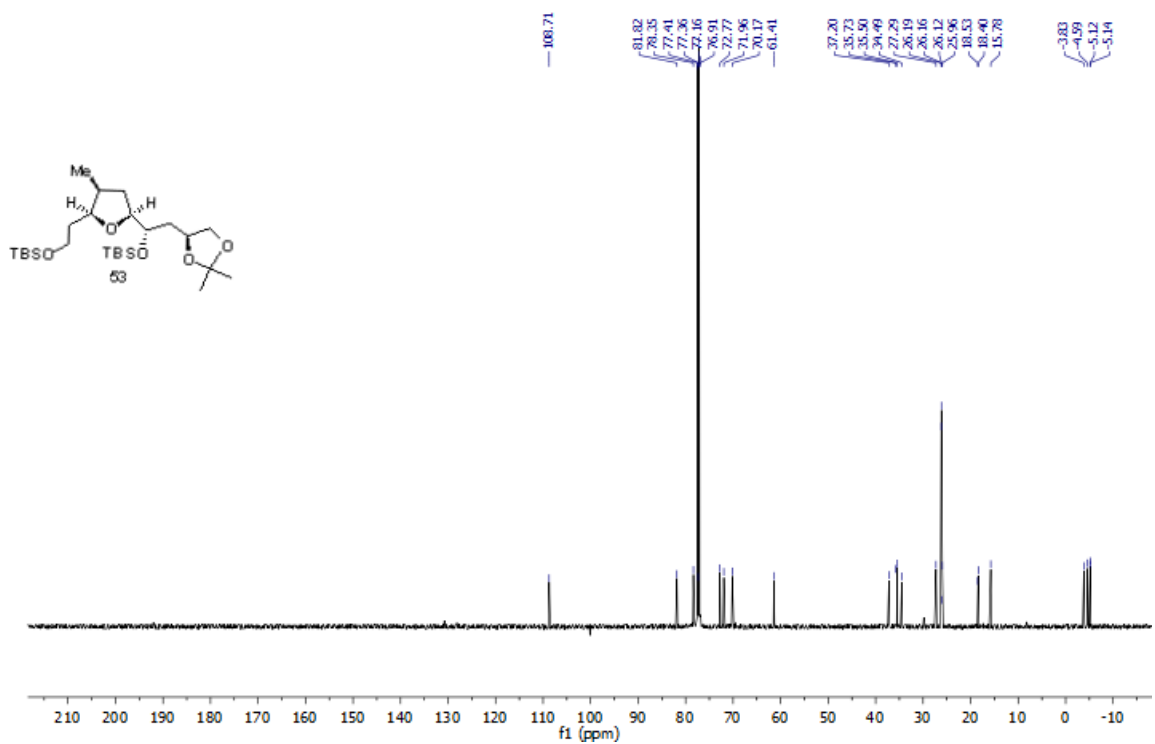



The 500 MHz <sup>1</sup>H-NMR Spectrum of Compound **53a** in CDCl<sub>3</sub>

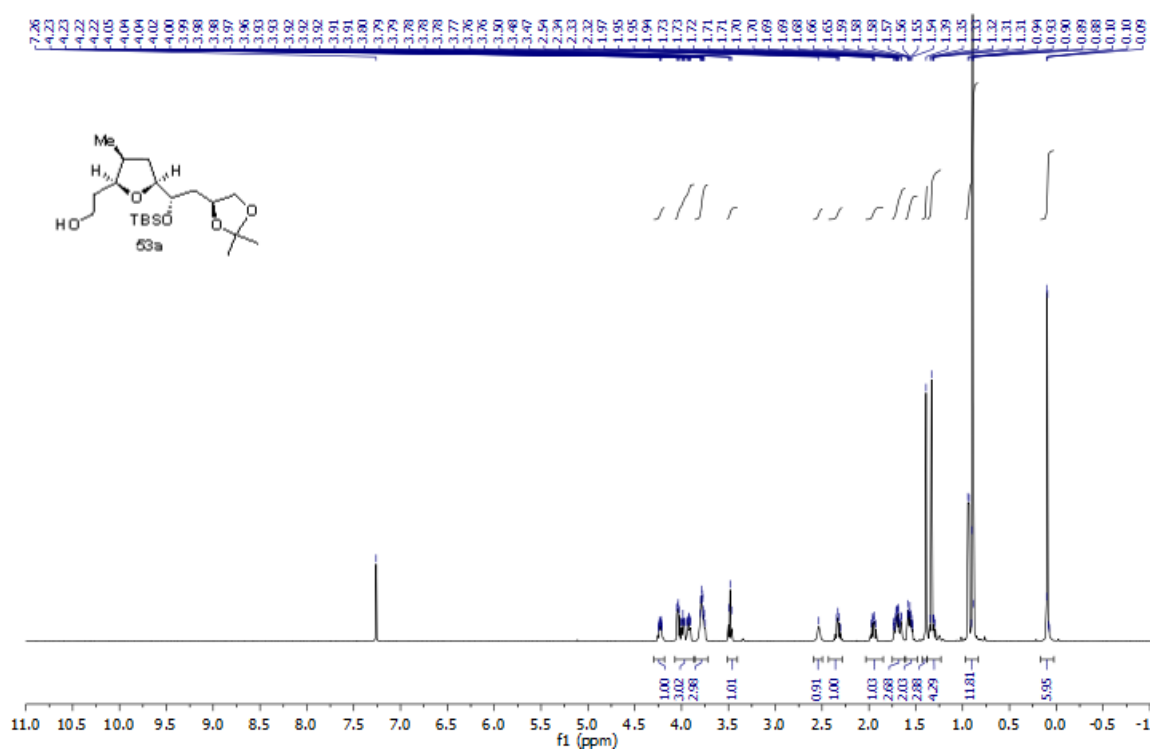

The 125 MHz <sup>13</sup>C-NMR Spectrum of Compound **53a** in CDCl<sub>3</sub>

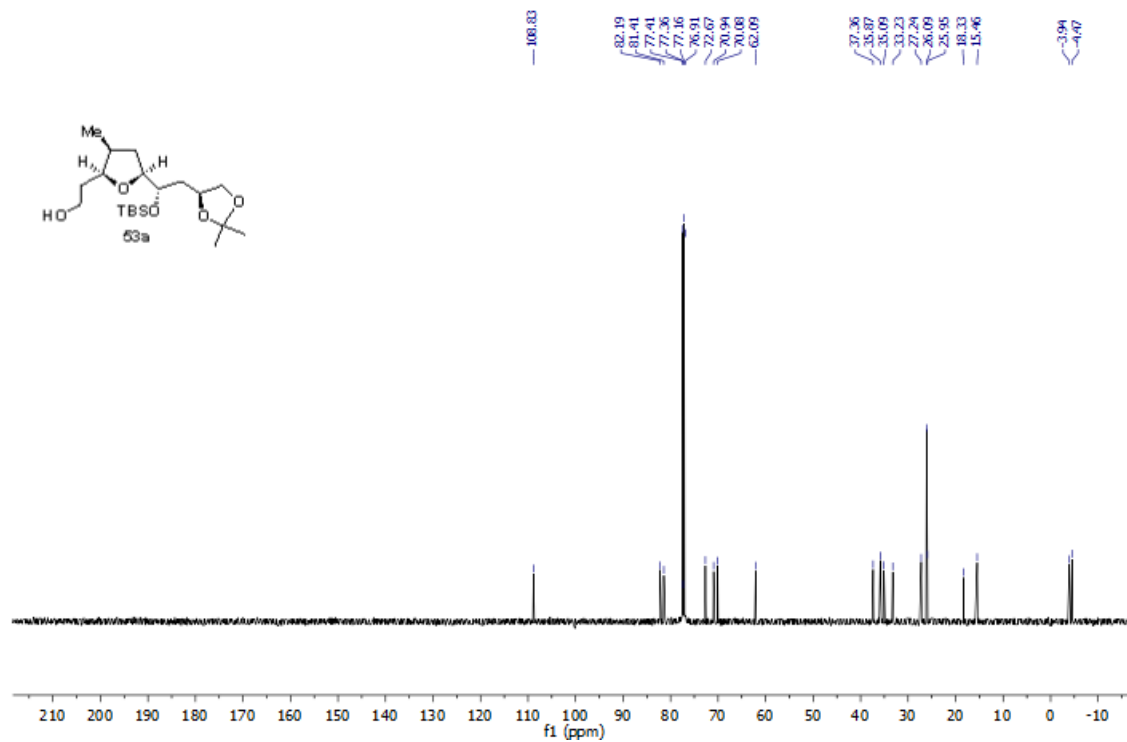

The 500 MHz  $^1\text{H-NMR}$  Spectrum of Compound **54** in  $\text{CDCl}_3$

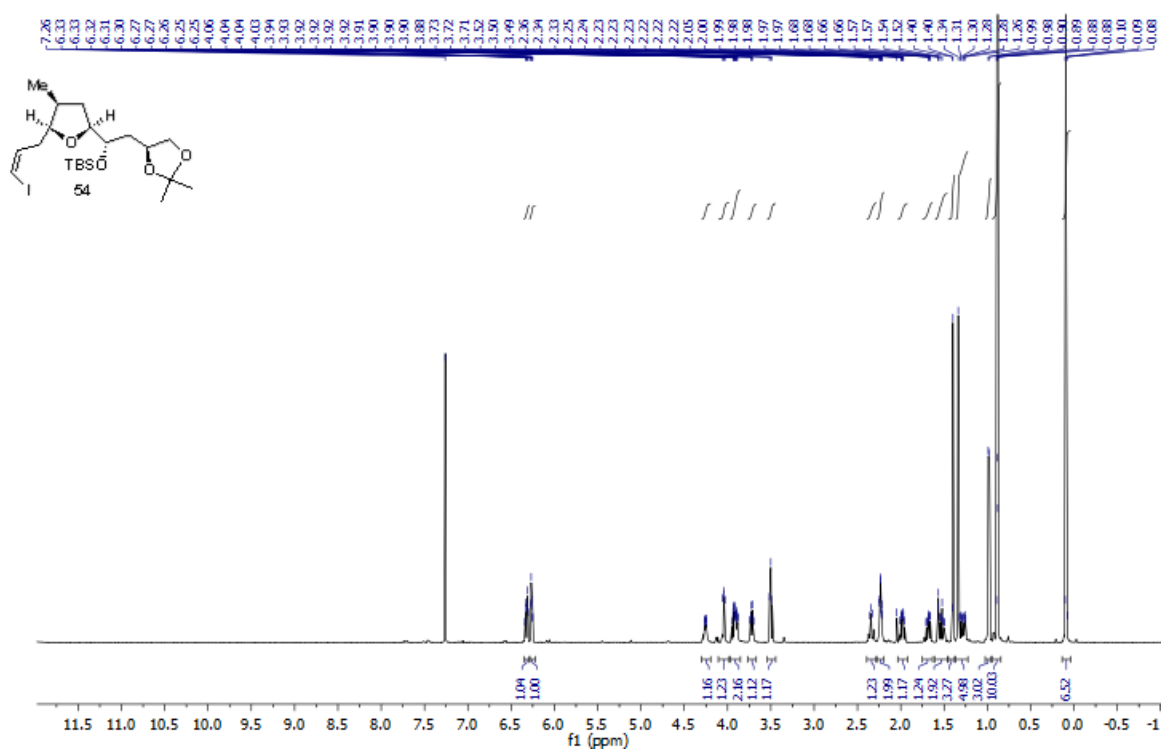

The 125 MHz  $^{13}\text{C-NMR}$  Spectrum of Compound **54** in  $\text{CDCl}_3$

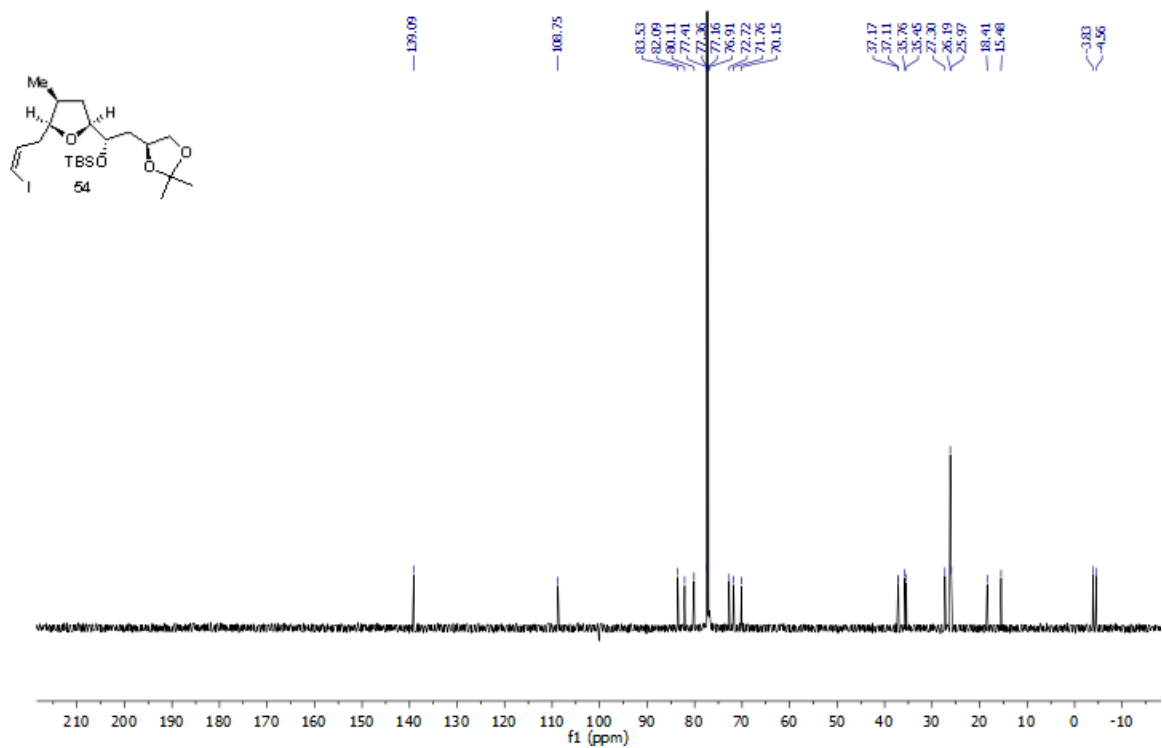

The 500 MHz  $^1\text{H}$ -NMR Spectrum of Compound **19a** in  $\text{CDCl}_3$

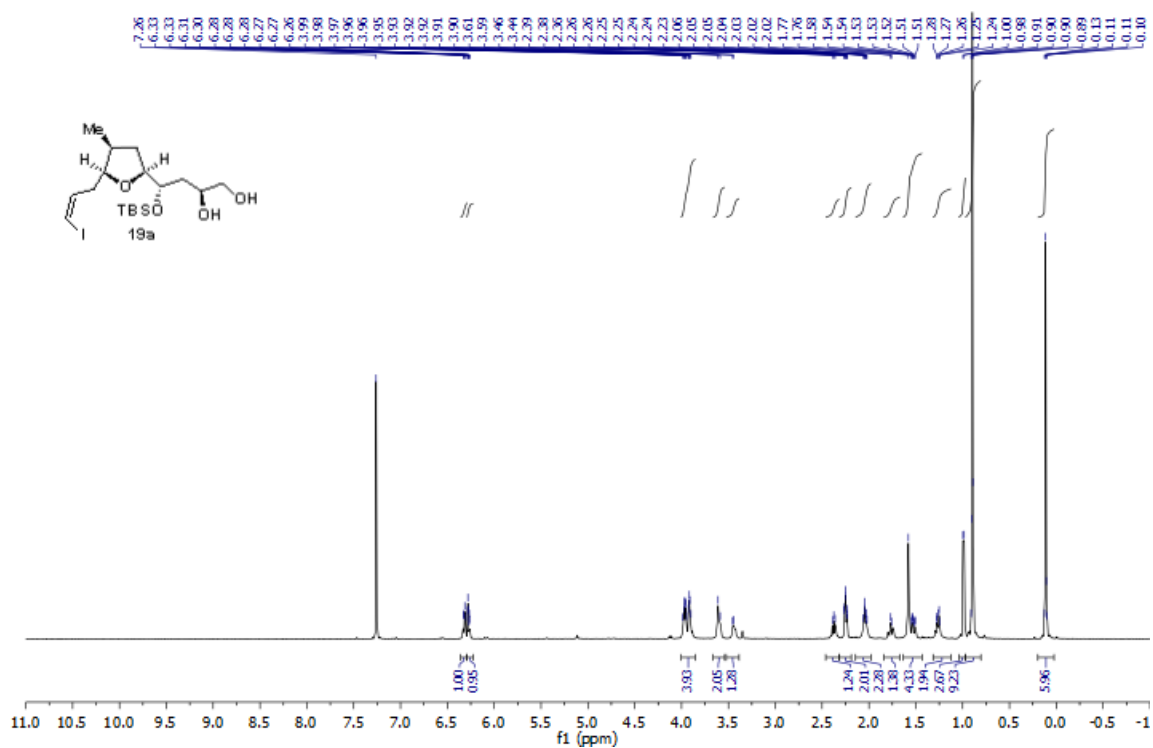

The 125 MHz  $^{13}\text{C}$ -NMR Spectrum of Compound **19a** in  $\text{CDCl}_3$

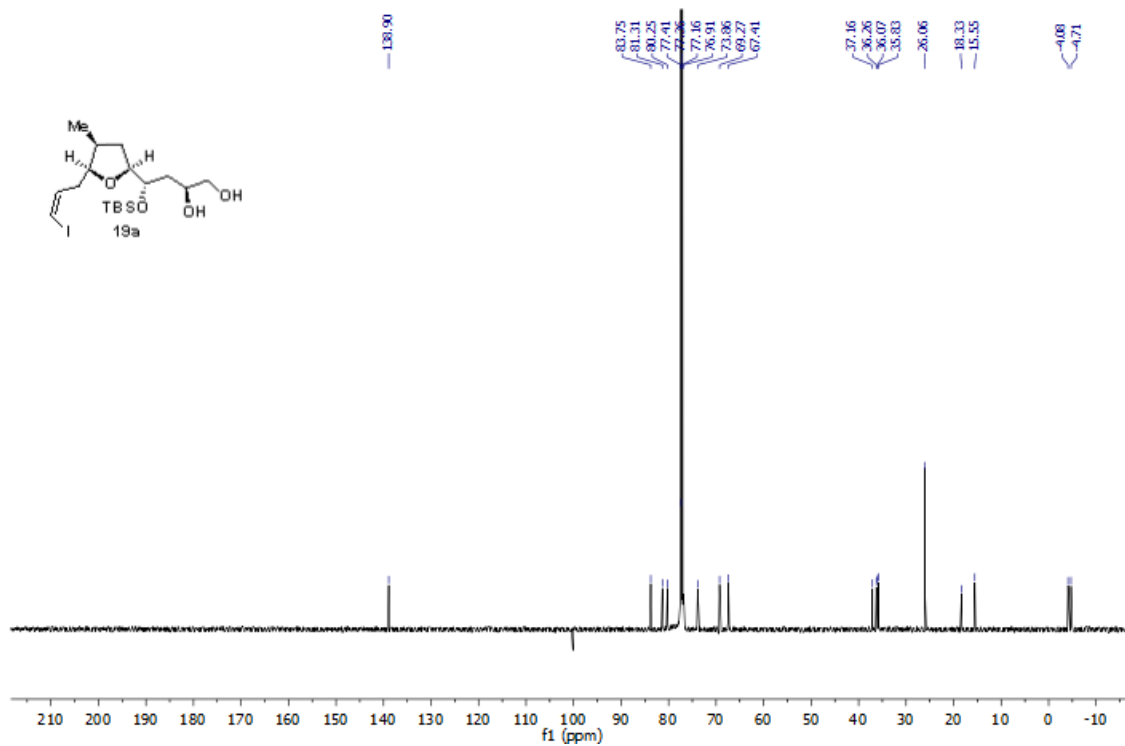

The 500 MHz  $^1\text{H}$ -NMR Spectrum of Compound **19** in  $\text{CDCl}_3$

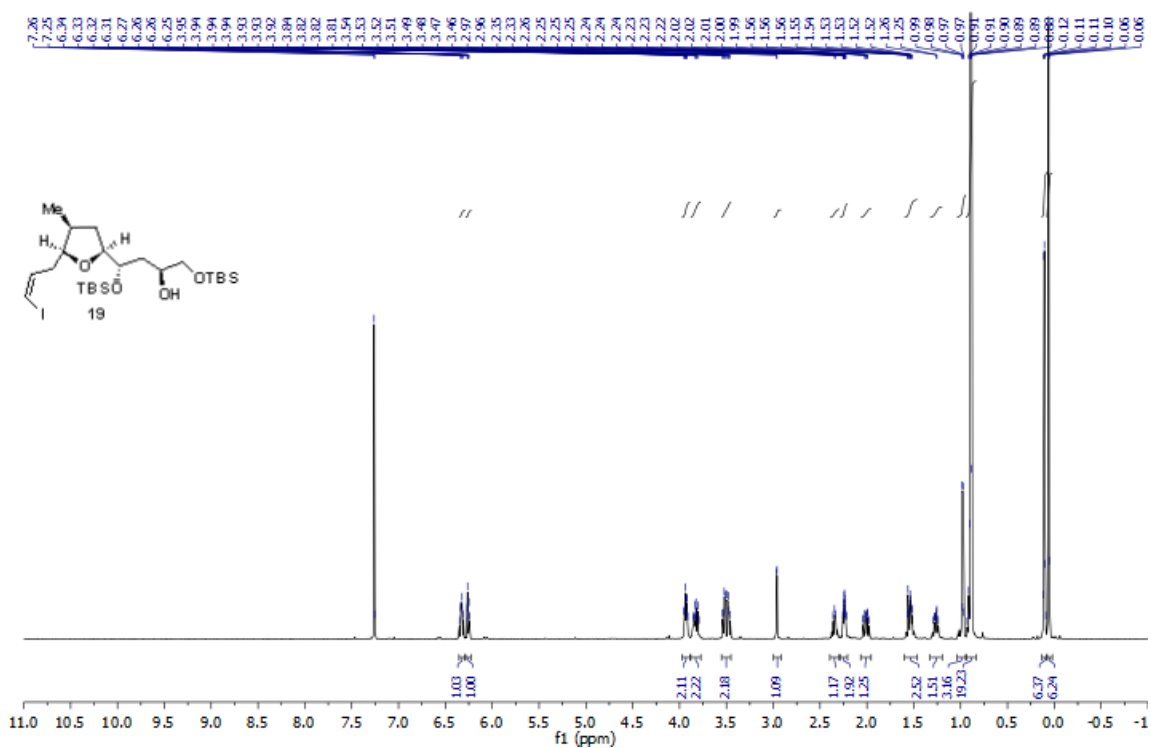

The 125 MHz  $^{13}\text{C}$ -NMR Spectrum of Compound **19** in  $\text{CDCl}_3$

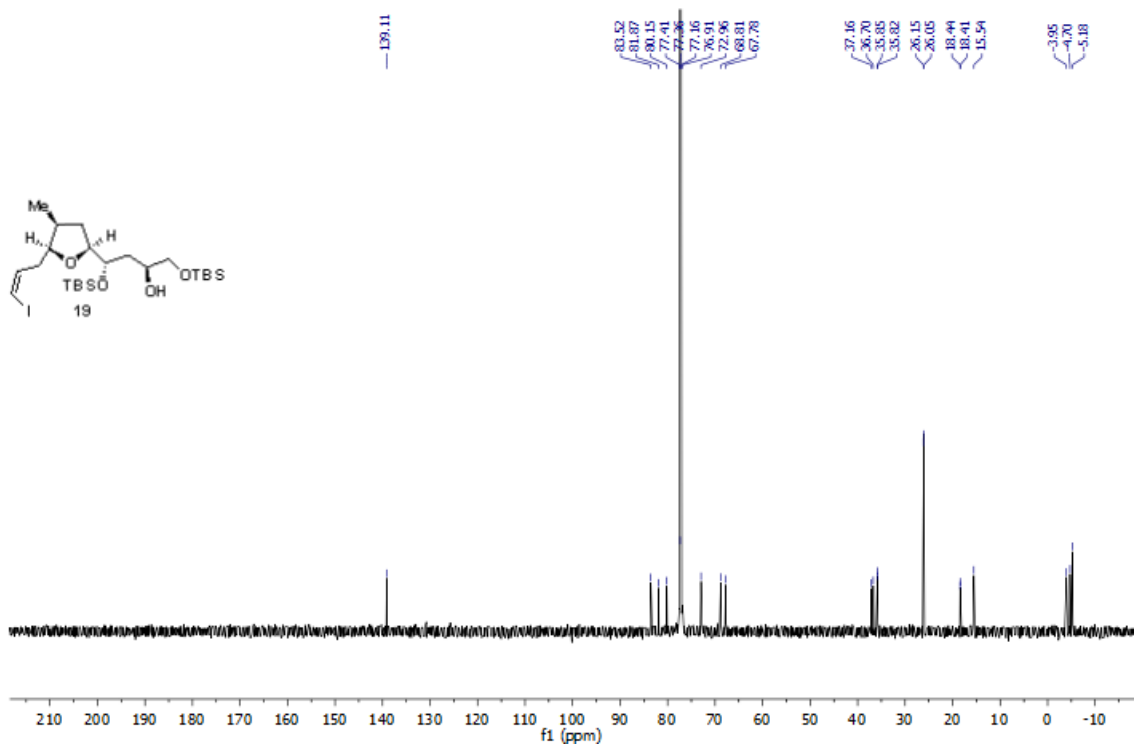

The 500 MHz  $^1\text{H}$ -NMR Spectrum of Compound **60** in  $\text{CDCl}_3$

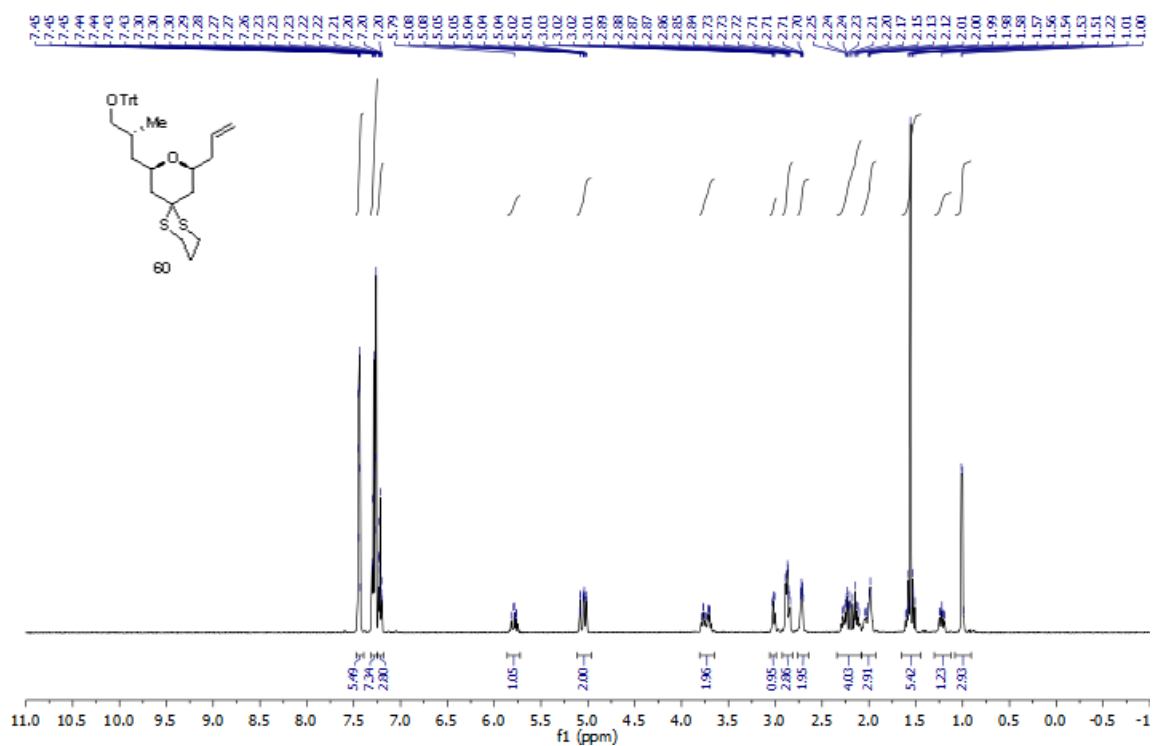

The 125 MHz  $^{13}\text{C}$ -NMR Spectrum of Compound **60** in  $\text{CDCl}_3$

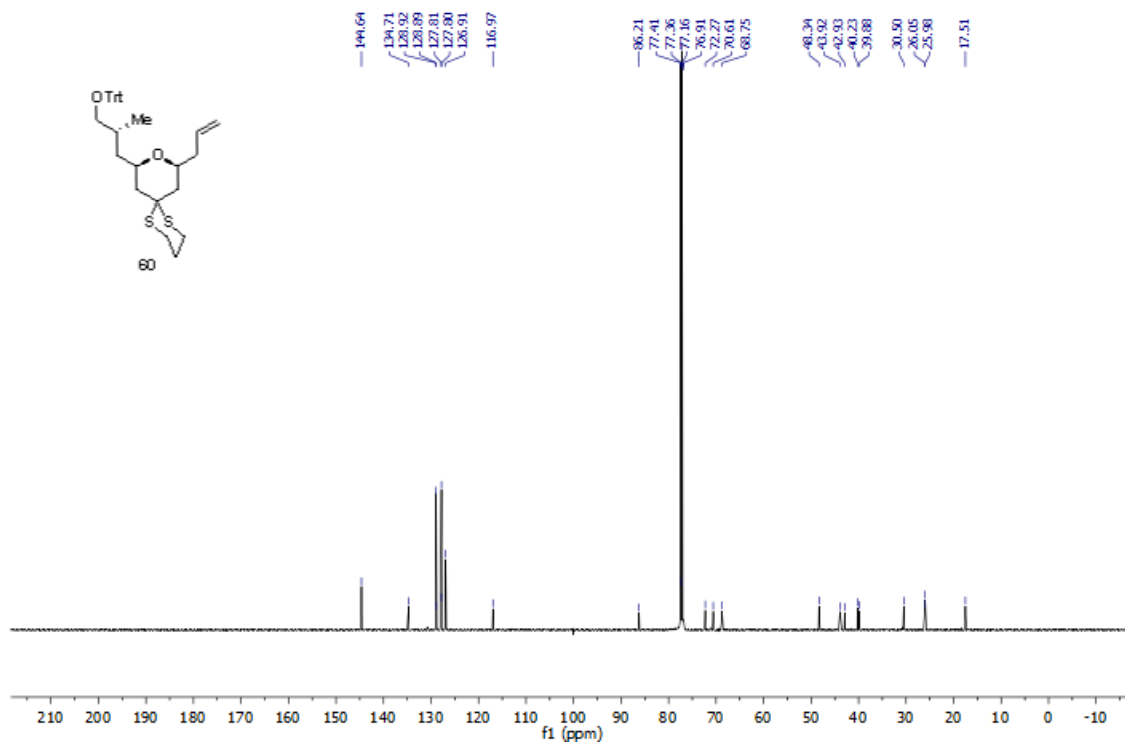



The 500 MHz  $^1\text{H-NMR}$  Spectrum of Compound **61** in  $\text{CDCl}_3$

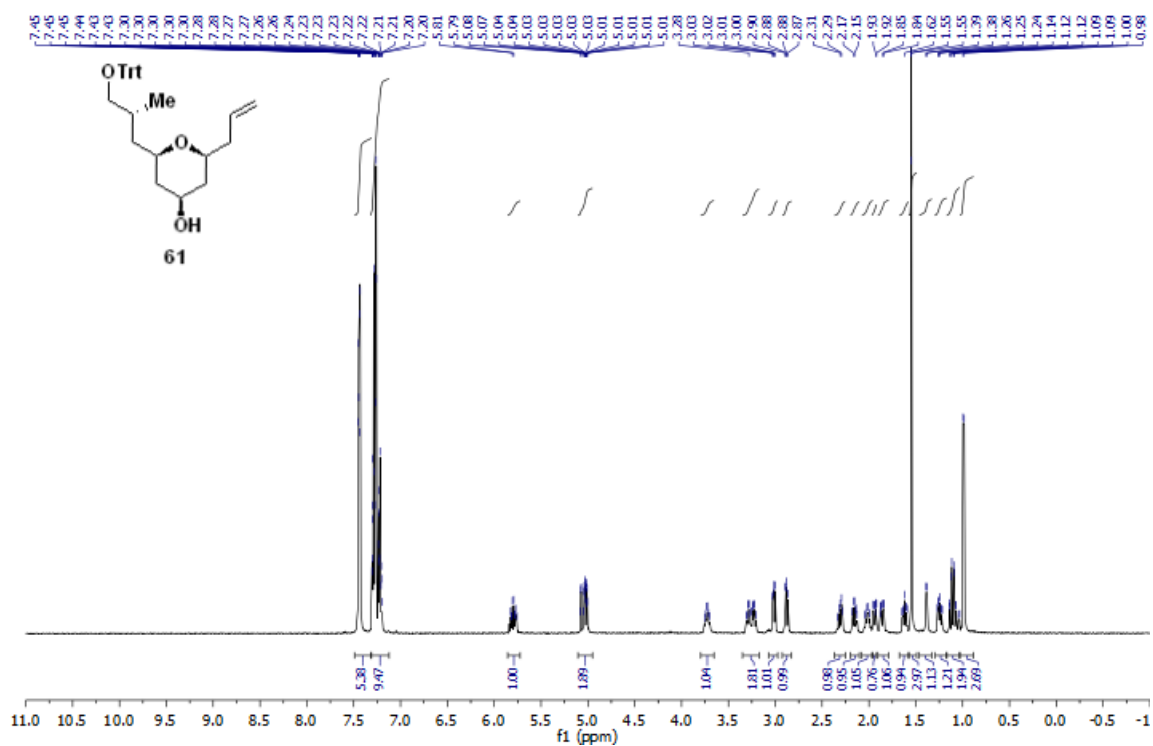

The 125 MHz  $^{13}\text{C-NMR}$  Spectrum of Compound **61** in  $\text{CDCl}_3$

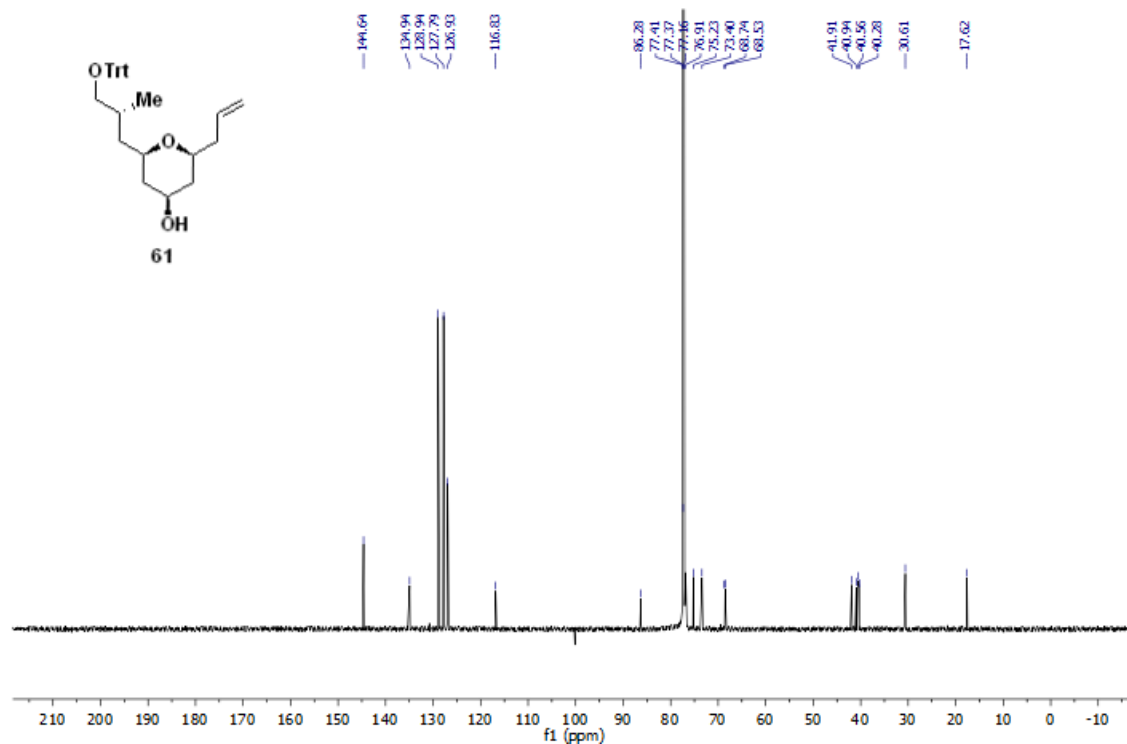

The 500 MHz  $^1\text{H-NMR}$  Spectrum of Compound **62a** in  $\text{CDCl}_3$

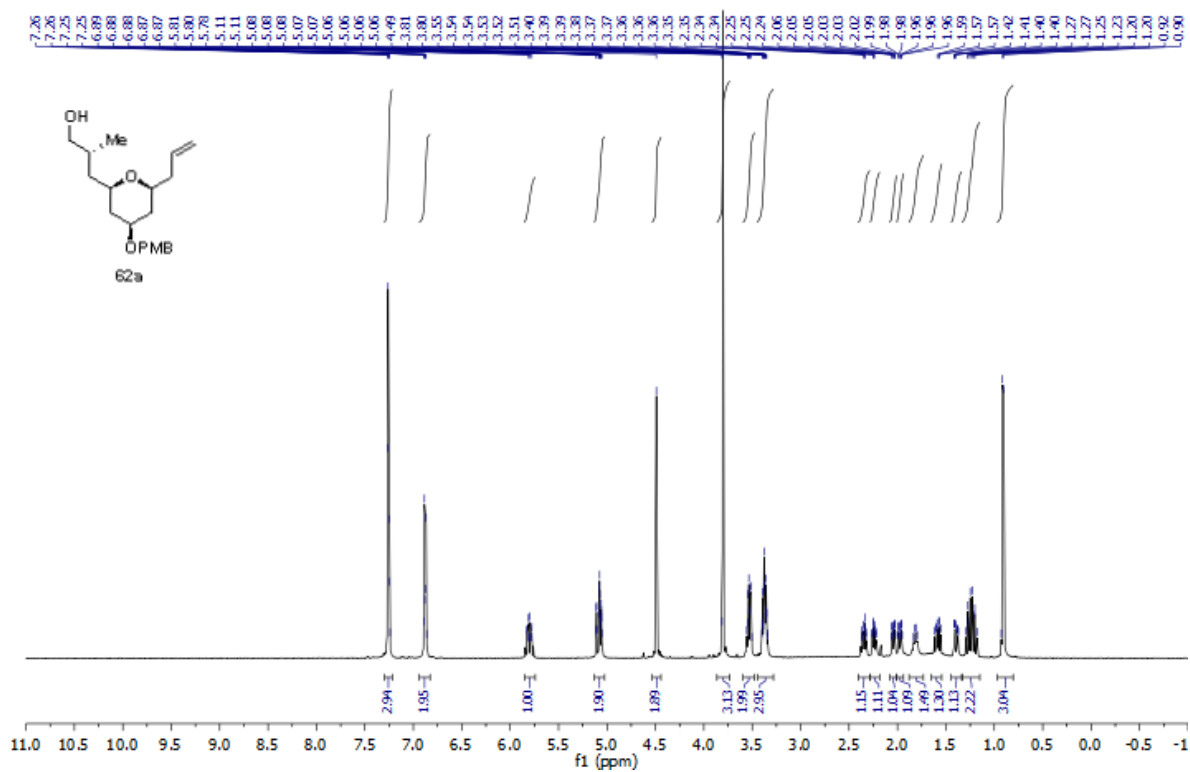

The 125 MHz  $^{13}\text{C-NMR}$  Spectrum of Compound **62a** in  $\text{CDCl}_3$

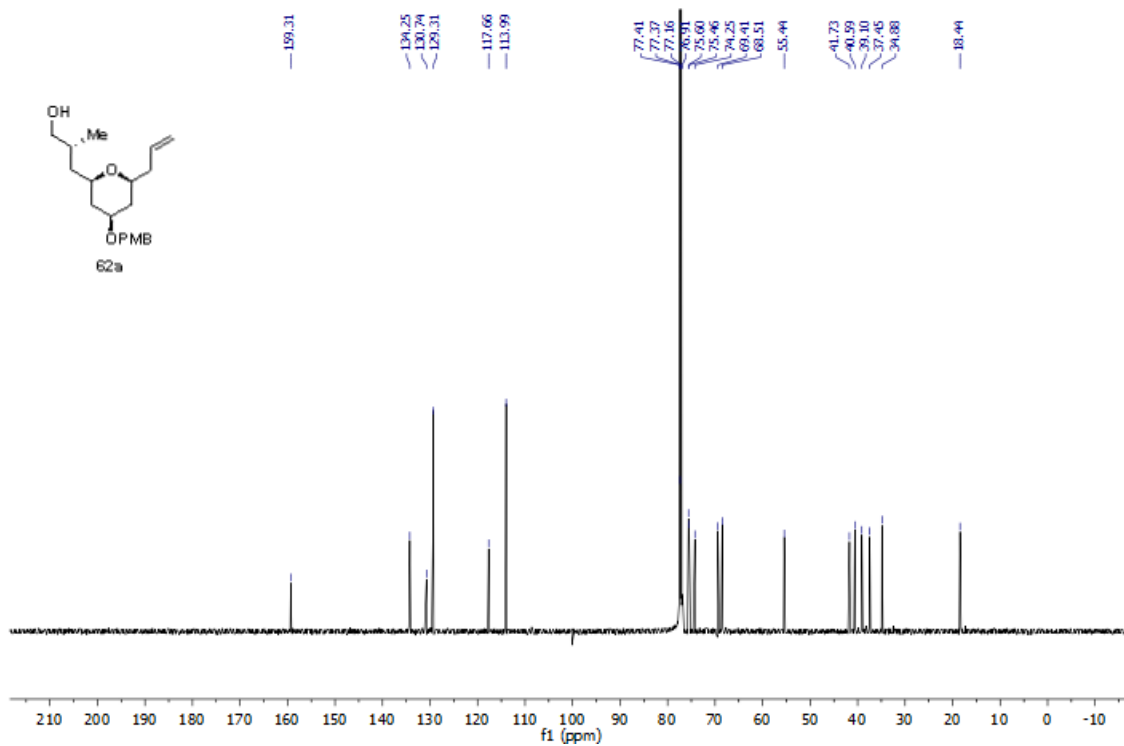



The 500 MHz <sup>1</sup>H-NMR Spectrum of Compound **62** in CDCl<sub>3</sub>

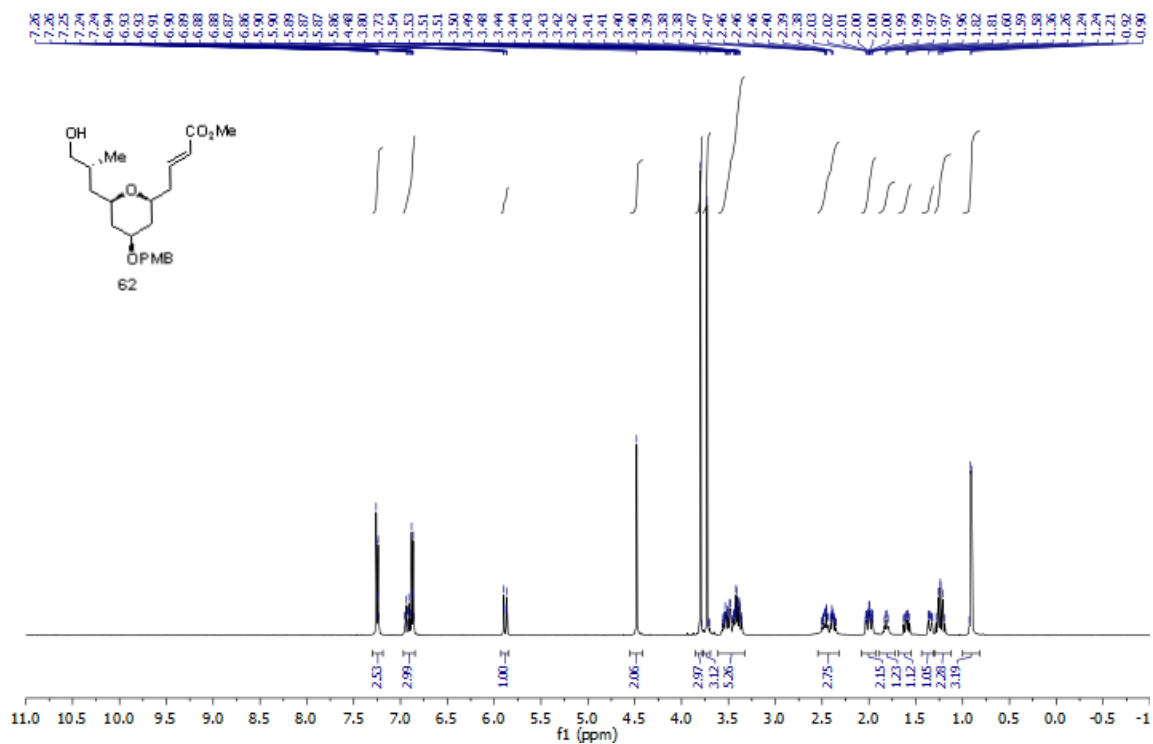

The 125 MHz <sup>13</sup>C-NMR Spectrum of Compound **62** in CDCl<sub>3</sub>

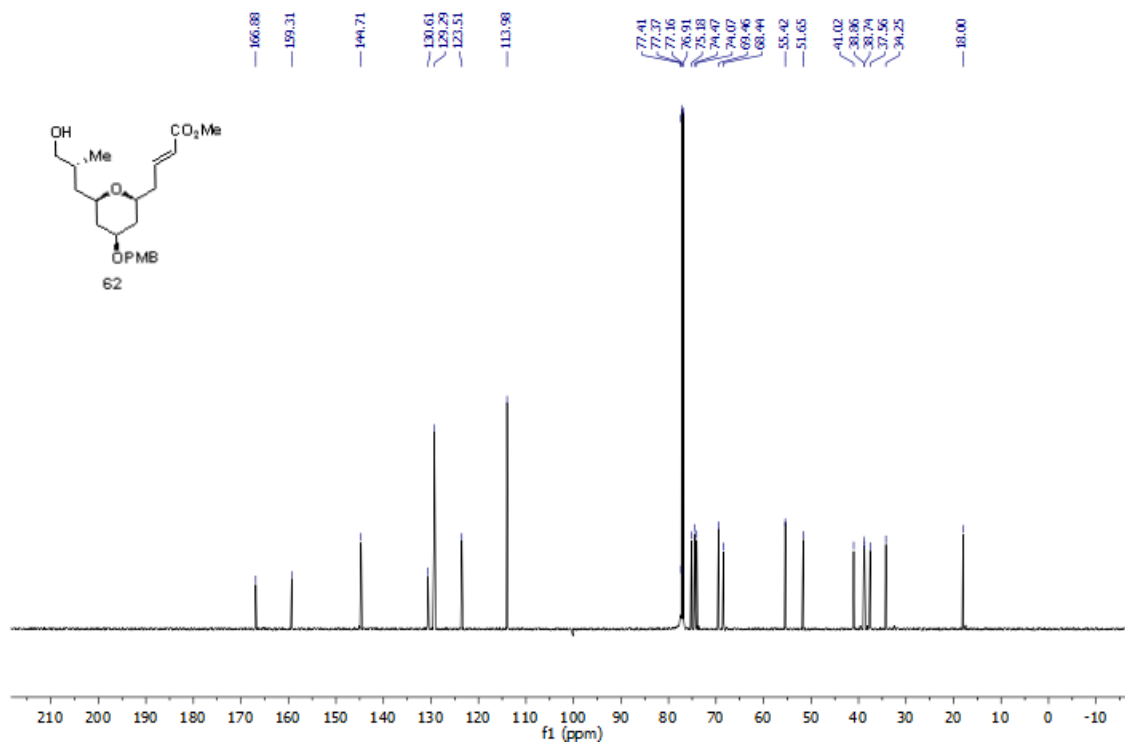

The 500 MHz  $^1\text{H-NMR}$  Spectrum of Compound **65** in  $\text{CDCl}_3$

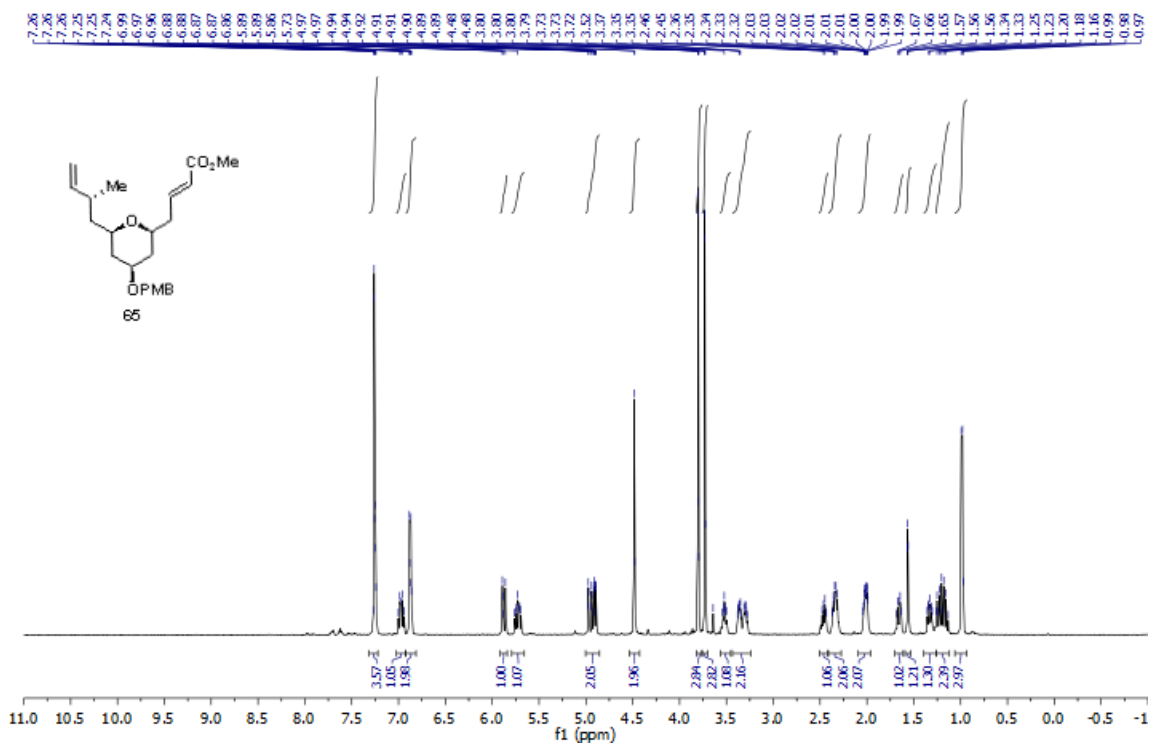

The 125 MHz  $^{13}\text{C-NMR}$  Spectrum of Compound **65** in  $\text{CDCl}_3$

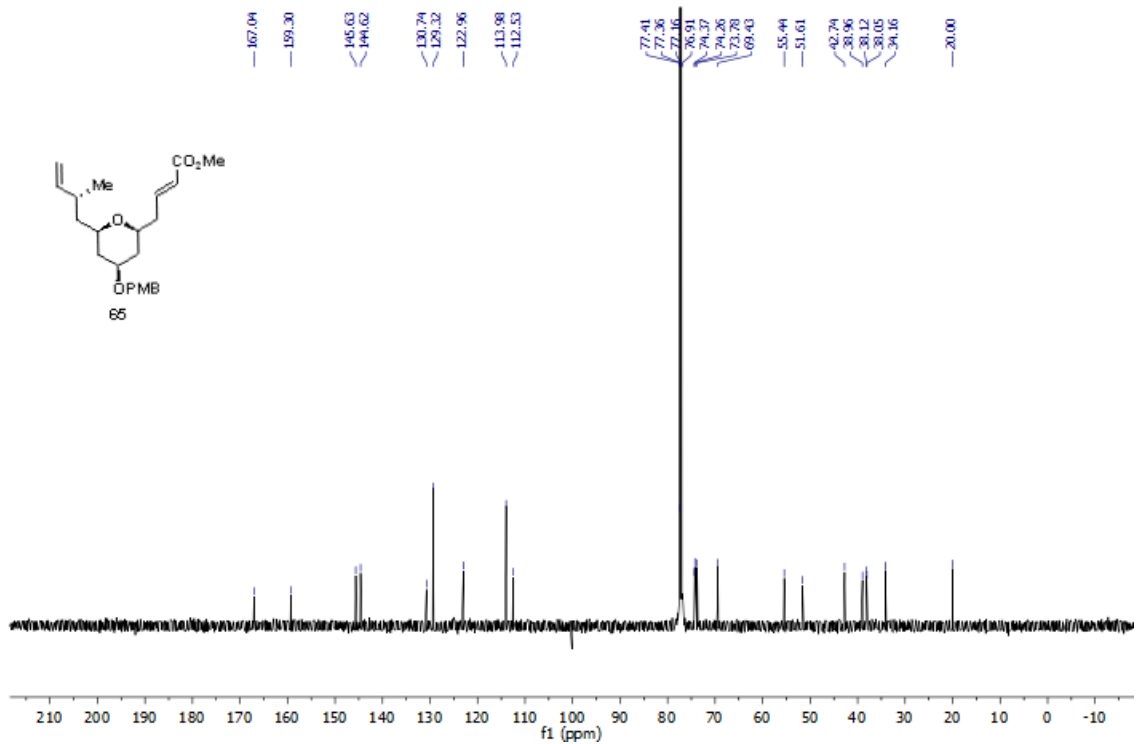

The 500 MHz  $^1\text{H-NMR}$  Spectrum of Compound **20** in  $\text{CDCl}_3$

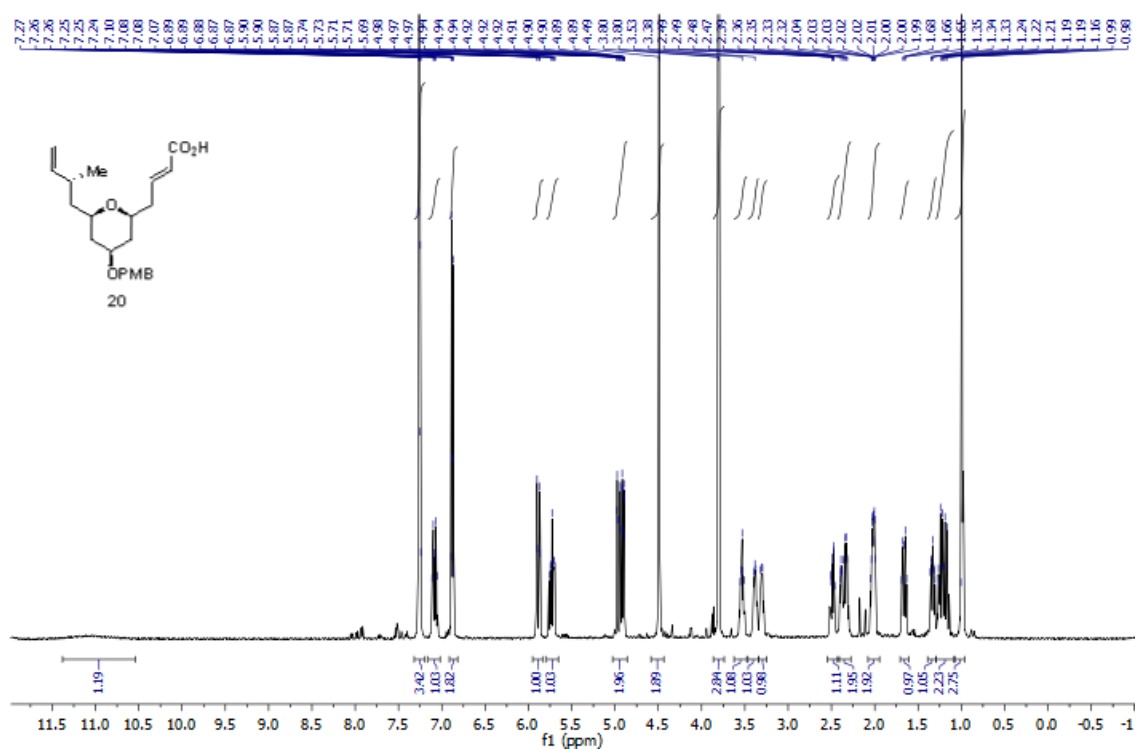

The 125 MHz  $^{13}\text{C-NMR}$  Spectrum of Compound **20** in  $\text{CDCl}_3$

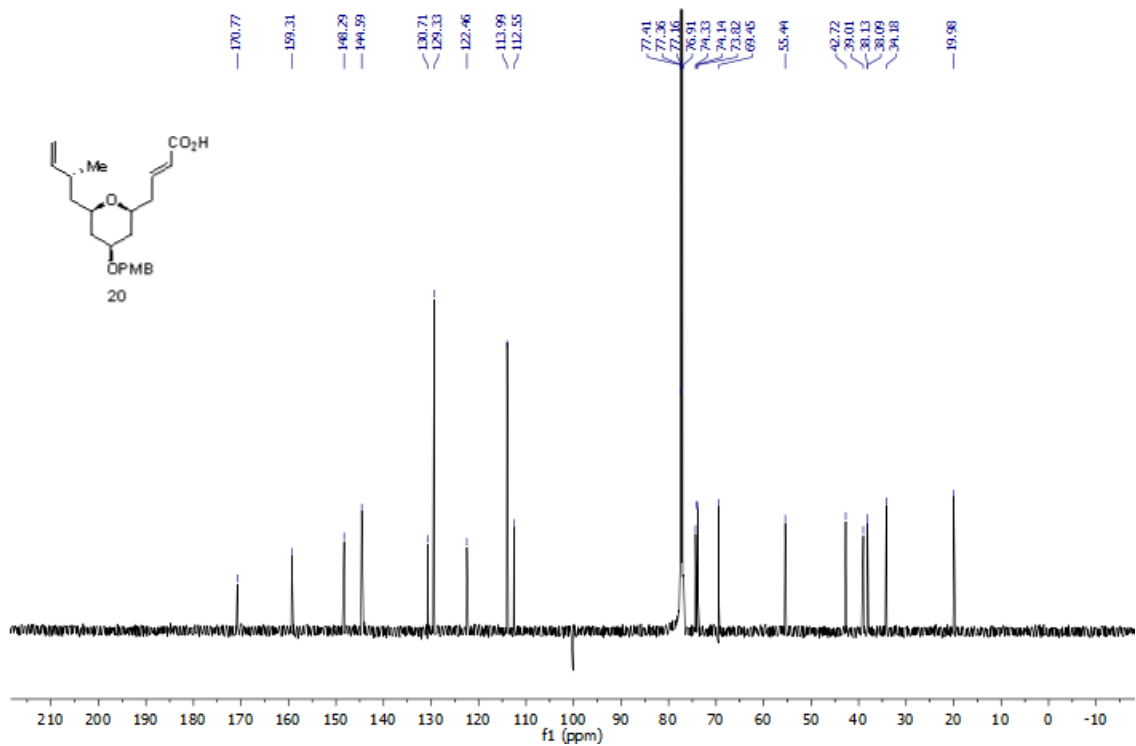

The 500 MHz  $^1\text{H-NMR}$  Spectrum of Compound **67** in  $\text{CDCl}_3$

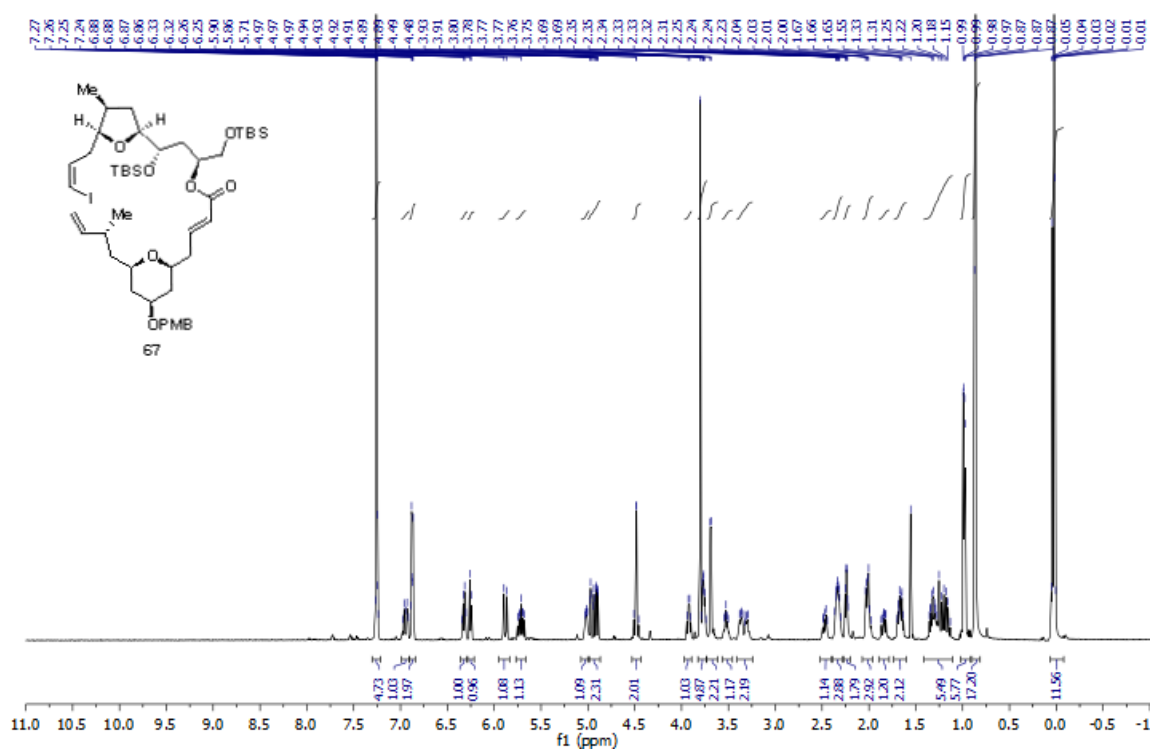



The 500 MHz  $^1\text{H-NMR}$  Spectrum of Compound **71** in  $\text{CDCl}_3$

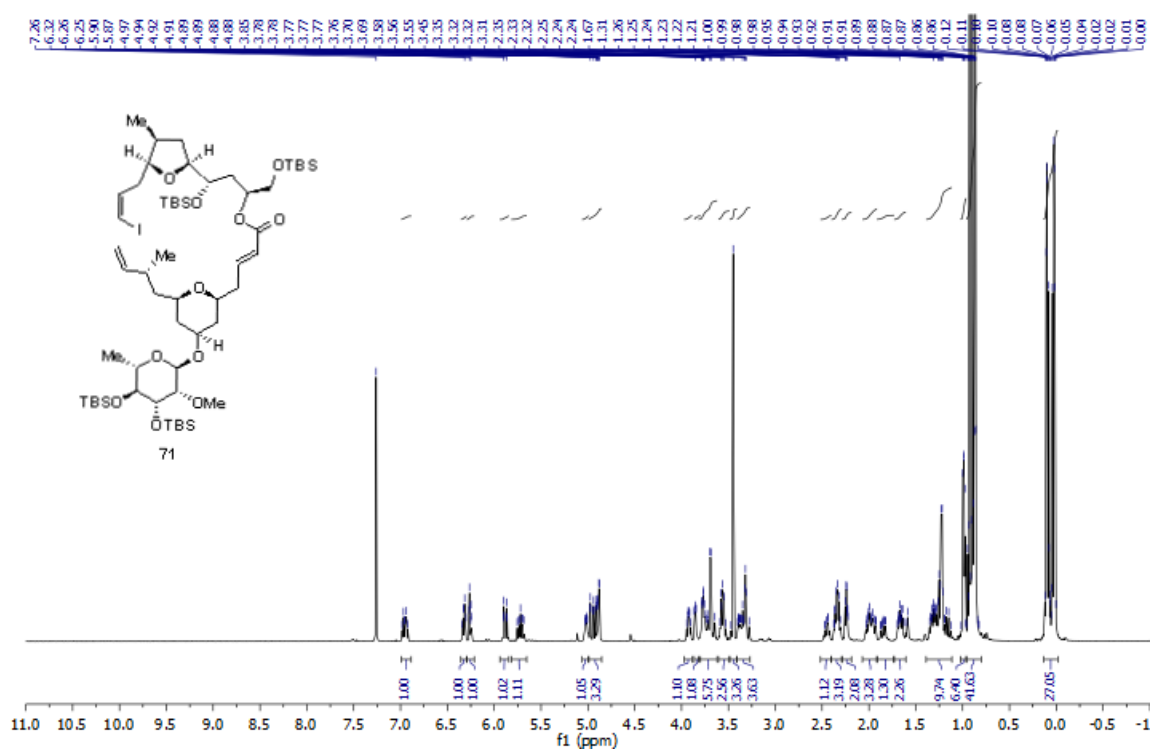

The 125 MHz  $^{13}\text{C-NMR}$  Spectrum of Compound **71** in  $\text{CDCl}_3$

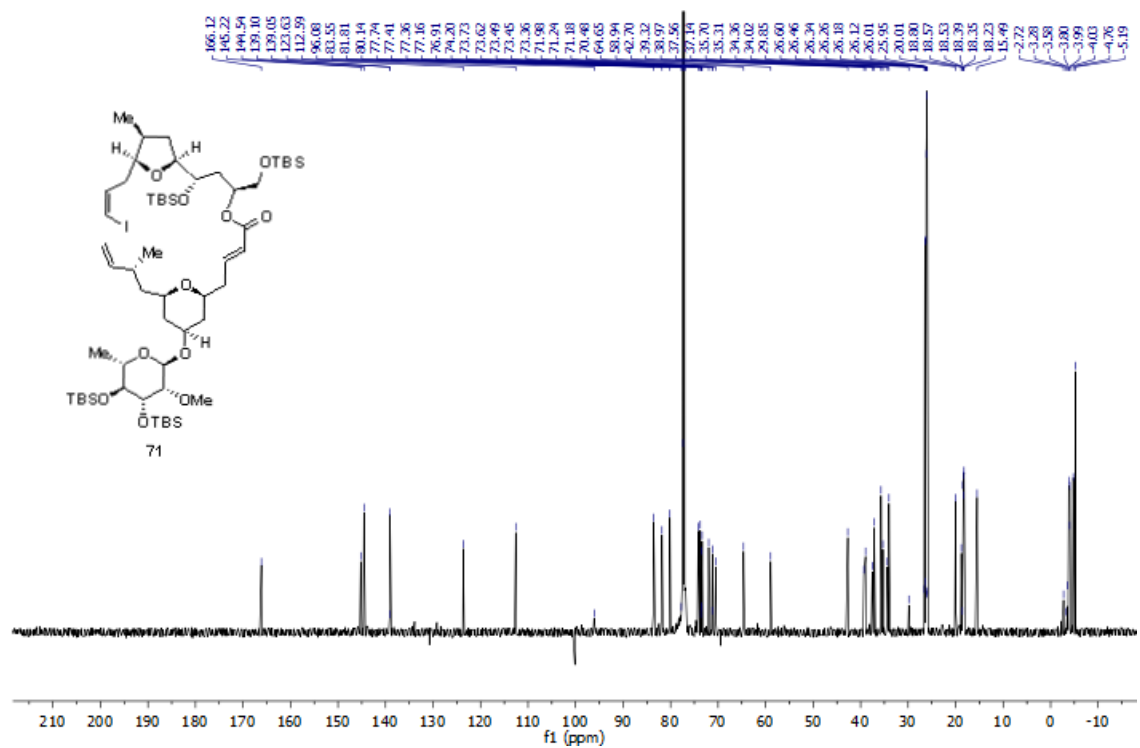

The 500 MHz <sup>1</sup>H-NMR Spectrum of Compound **71a** in CDCl<sub>3</sub>

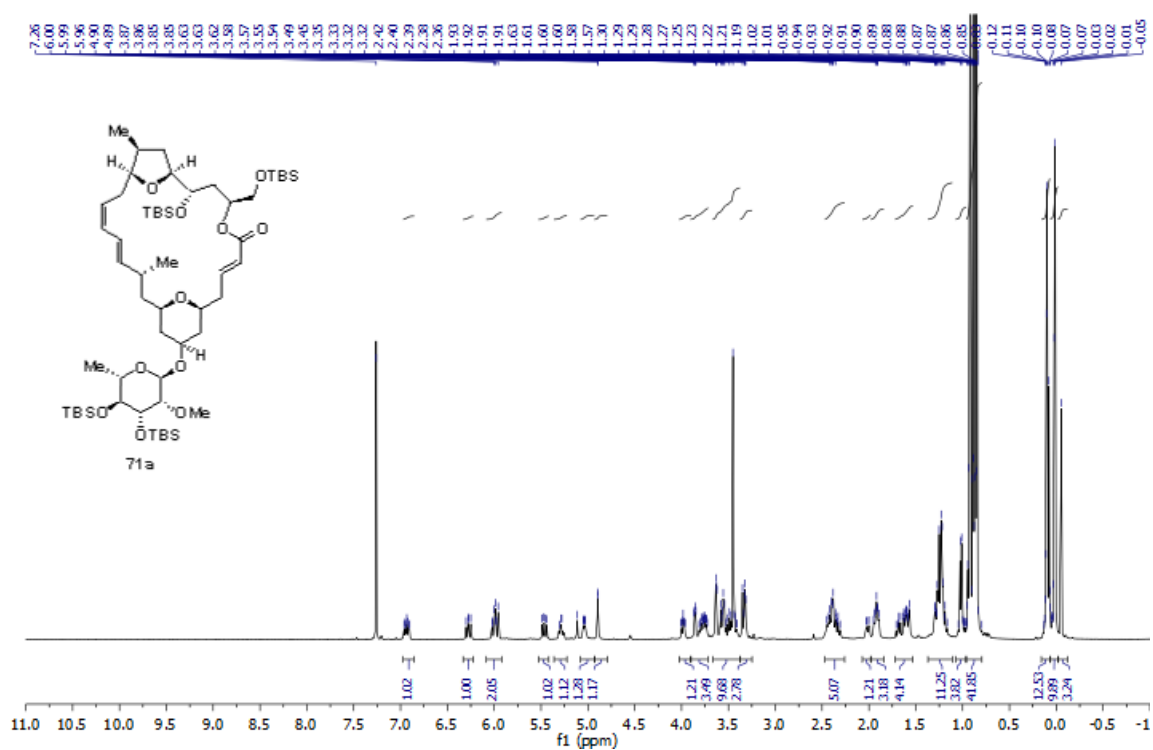

The 125 MHz <sup>13</sup>C-NMR Spectrum of Compound **71a** in CDCl<sub>3</sub>

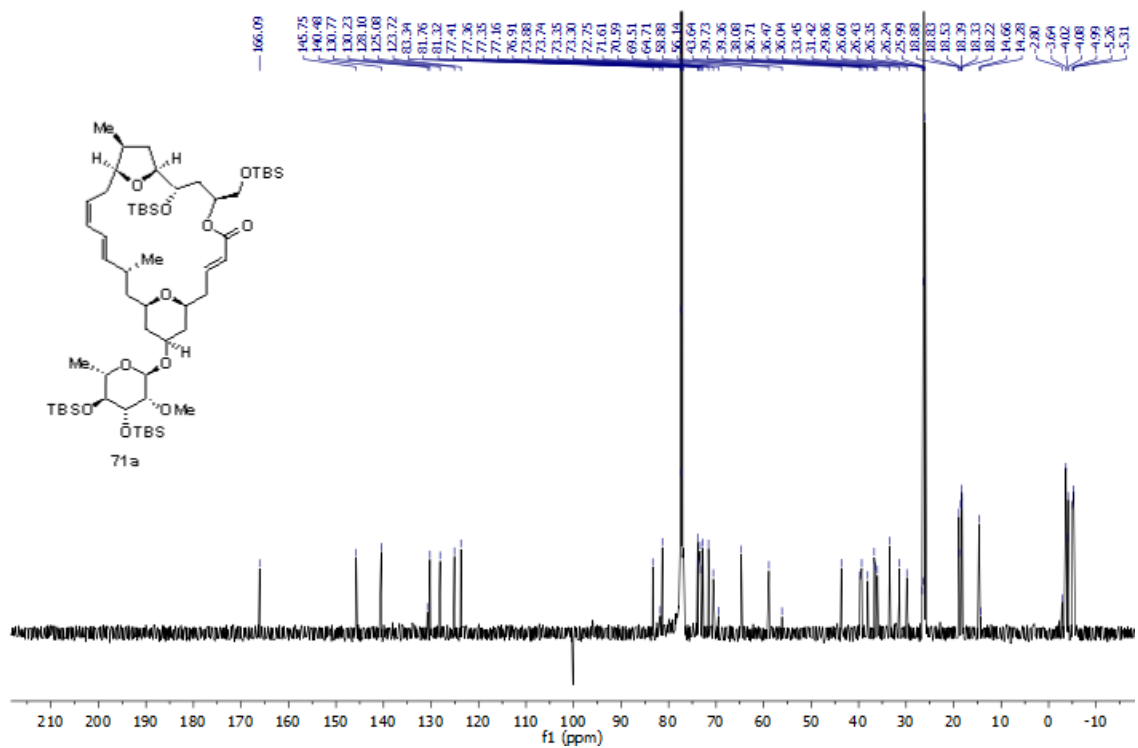

The 600 MHz  $^1\text{H-NMR}$  Spectrum of Compound 5 in  $\text{CDCl}_3$

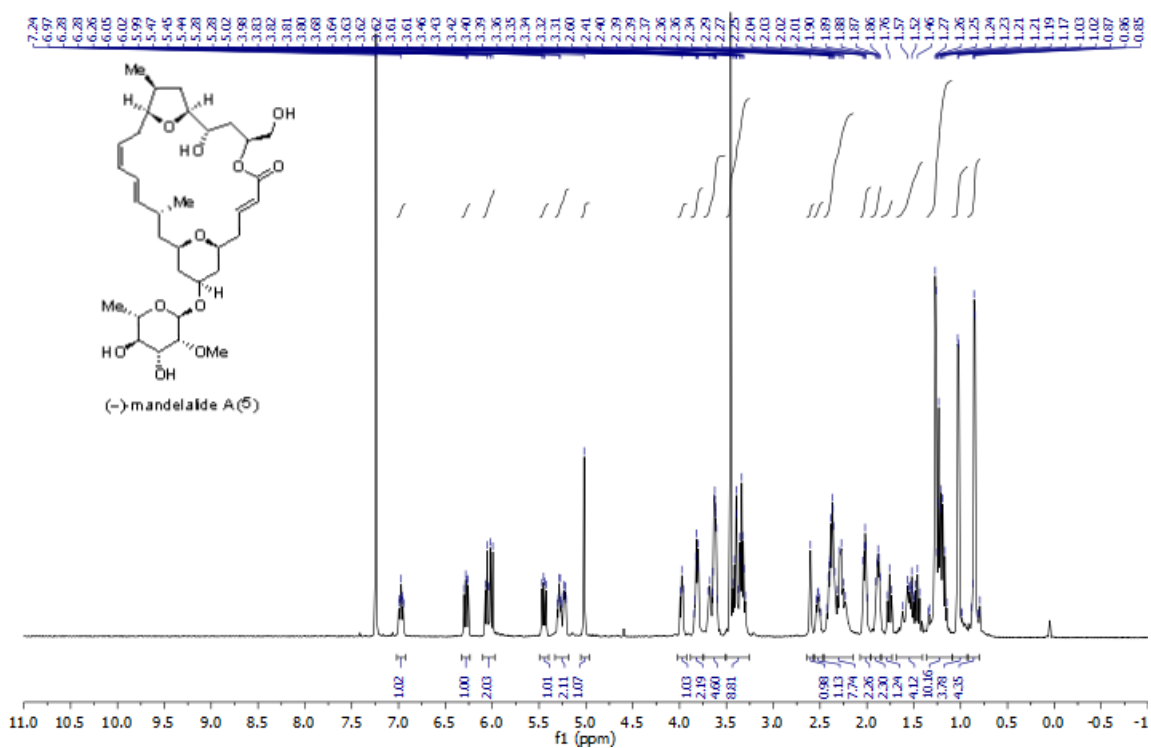

The 125 MHz  $^{13}\text{C-NMR}$  Spectrum of Compound 5 in  $\text{CDCl}_3$

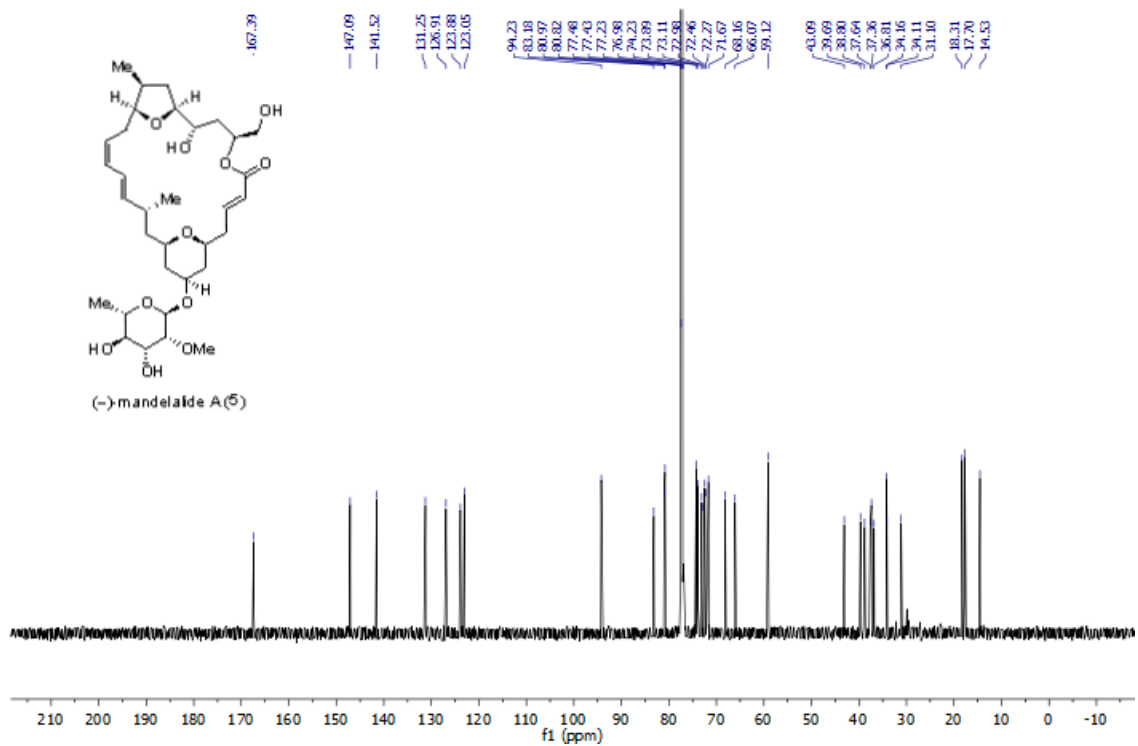



The 500 MHz  $^1\text{H}$ -NMR Spectrum of Compound **72** in  $\text{CDCl}_3$

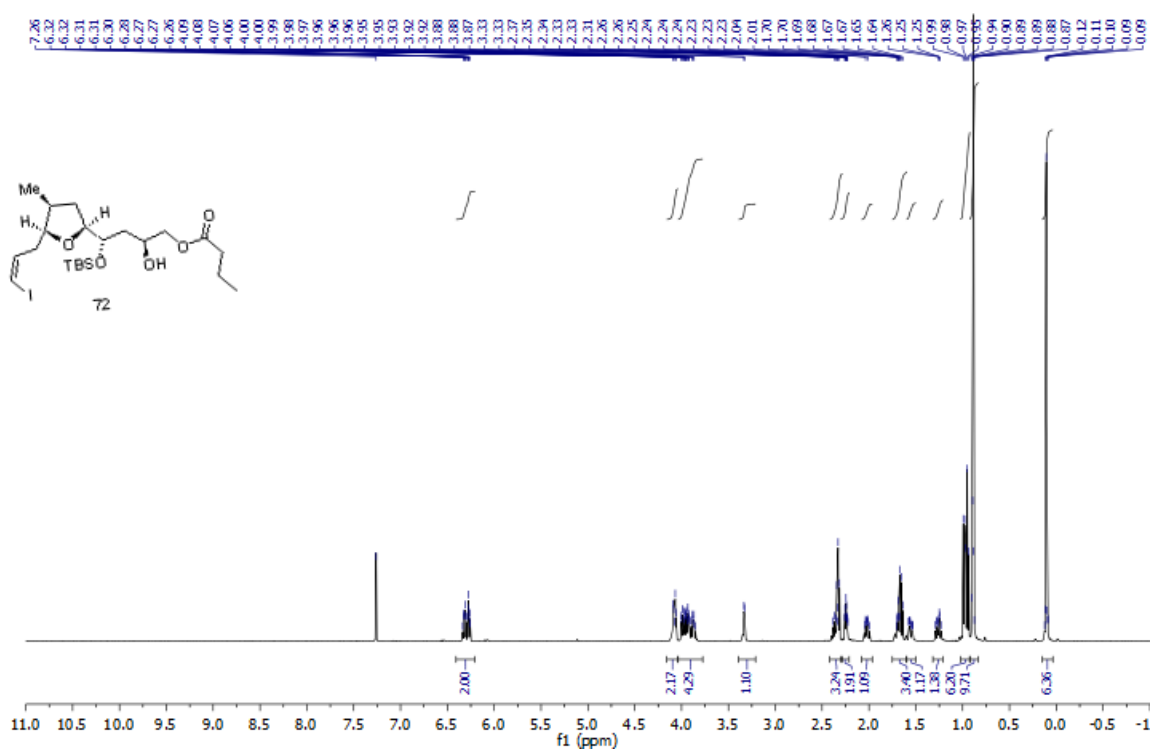

The 125 MHz  $^{13}\text{C}$ -NMR Spectrum of Compound **72** in  $\text{CDCl}_3$

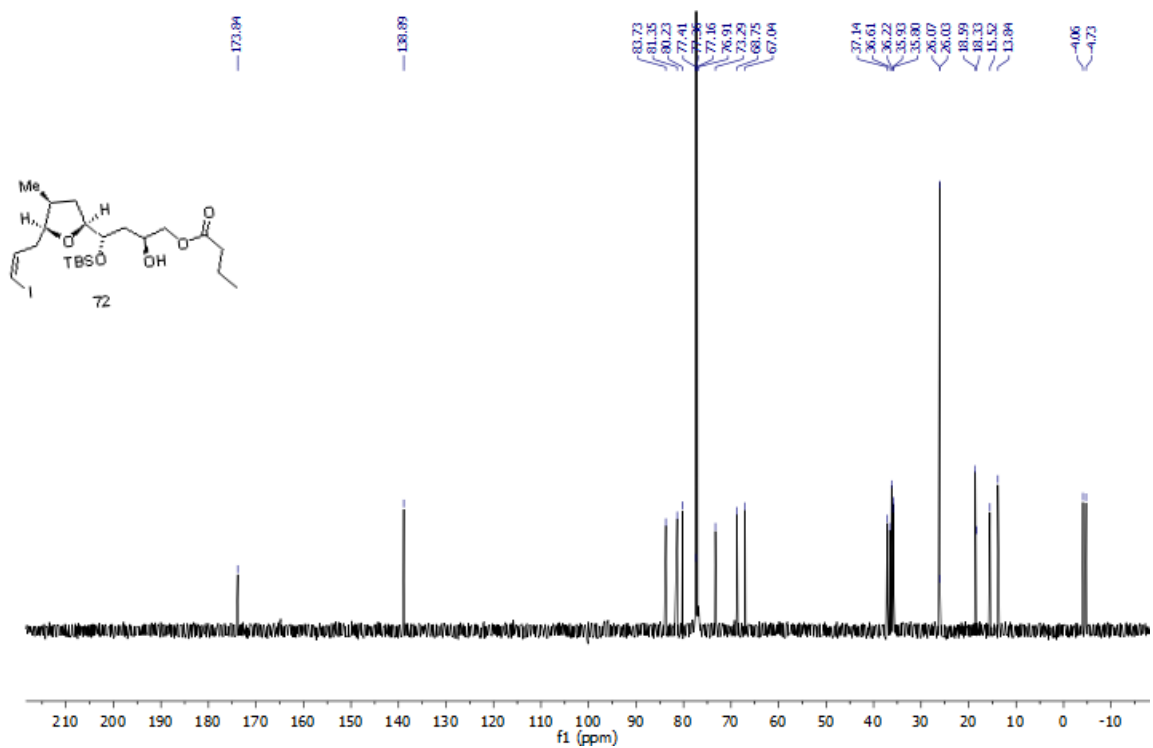





The 500 MHz  $^1\text{H}$ -NMR Spectrum of Compound **73** in  $\text{CDCl}_3$

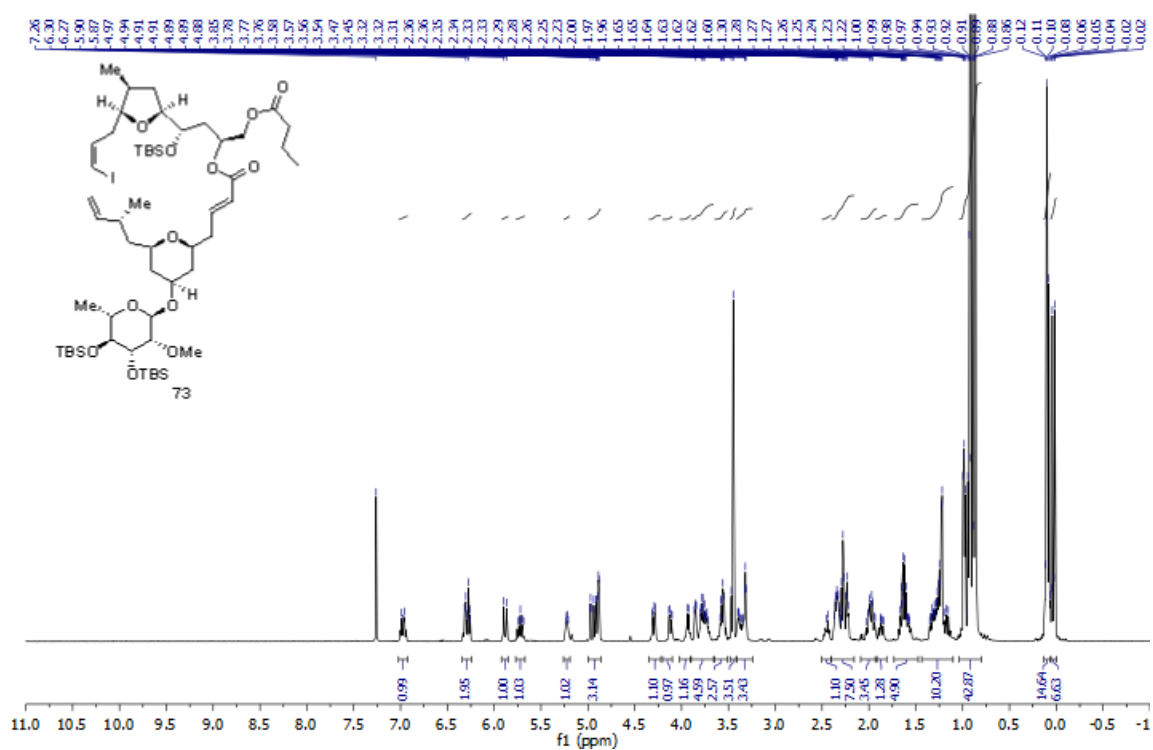

The 125 MHz  $^{13}\text{C}$ -NMR Spectrum of Compound **73** in  $\text{CDCl}_3$

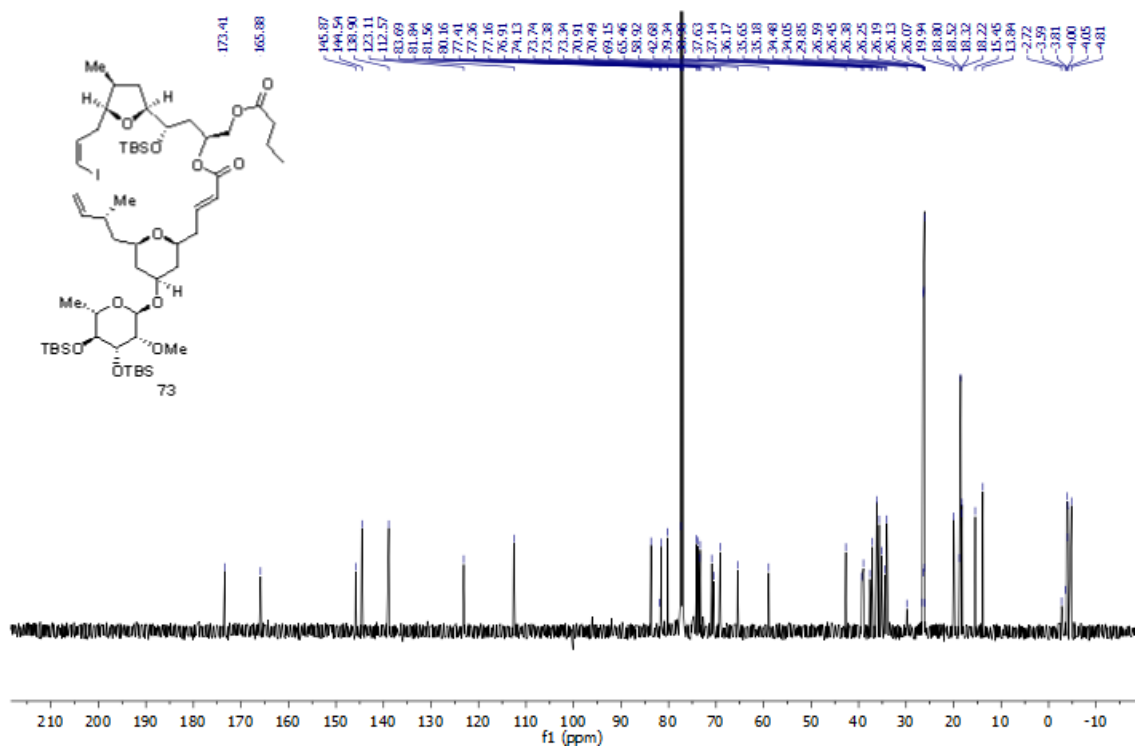

The 500 MHz  $^1\text{H-NMR}$  Spectrum of Compound **76** in  $\text{CDCl}_3$

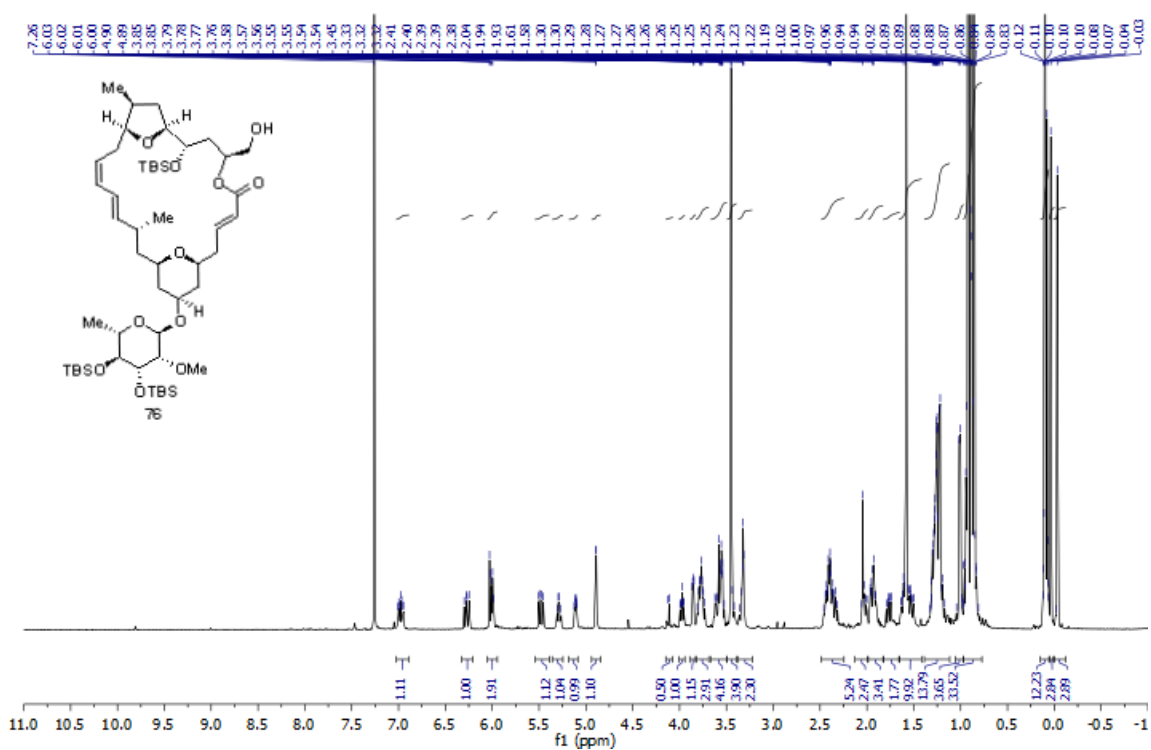

The 125 MHz  $^{13}\text{C-NMR}$  Spectrum of Compound **76** in  $\text{CDCl}_3$

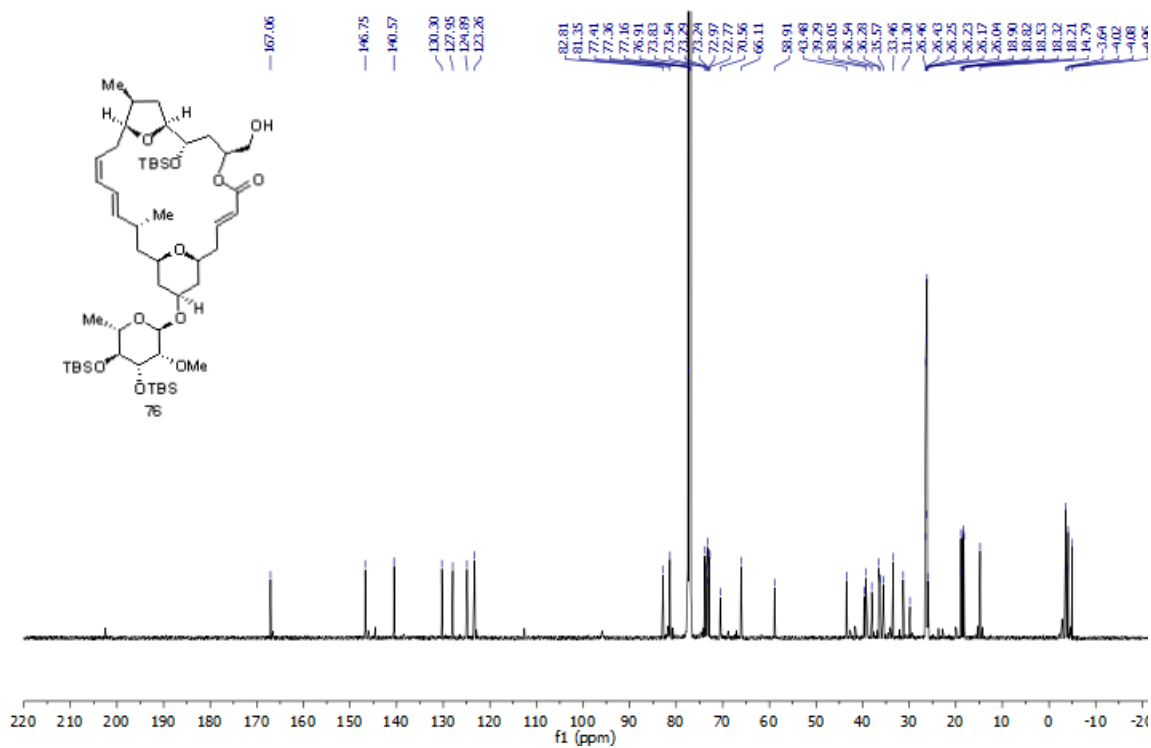

The 500 MHz  $^1\text{H-NMR}$  Spectrum of Compound **80** in  $\text{CDCl}_3$

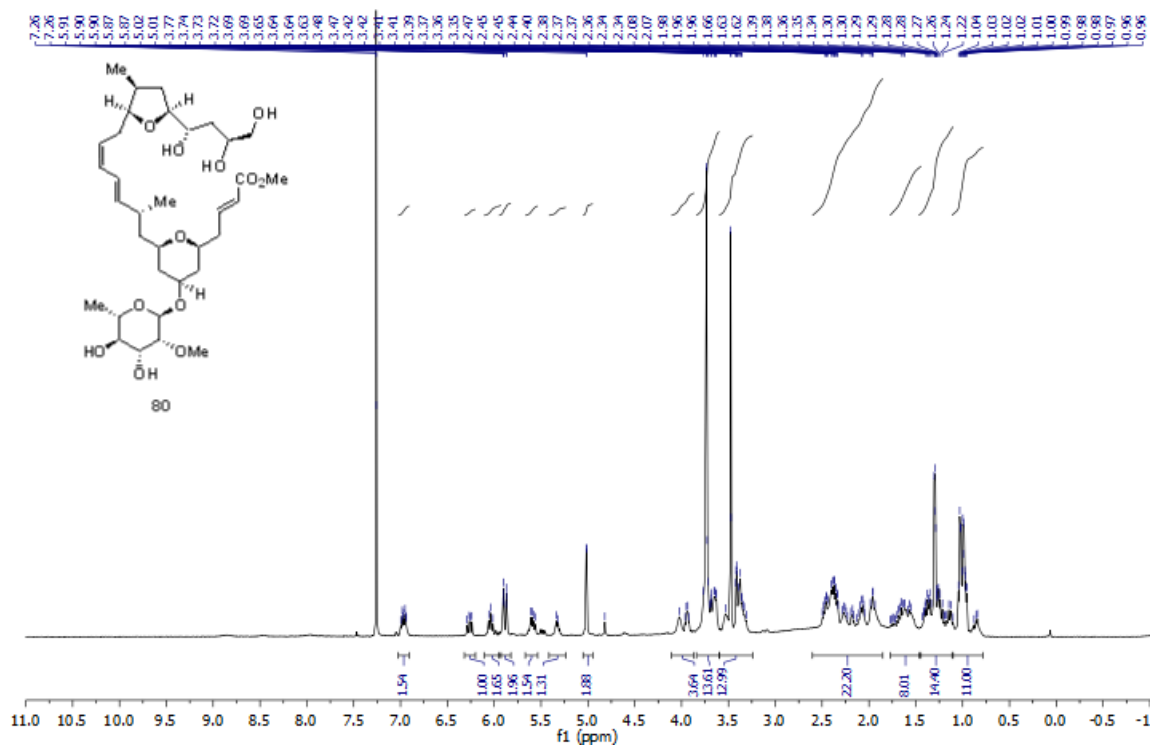

The 125 MHz  $^{13}\text{C-NMR}$  Spectrum of Compound **80** in  $\text{CD}_3\text{OD}$

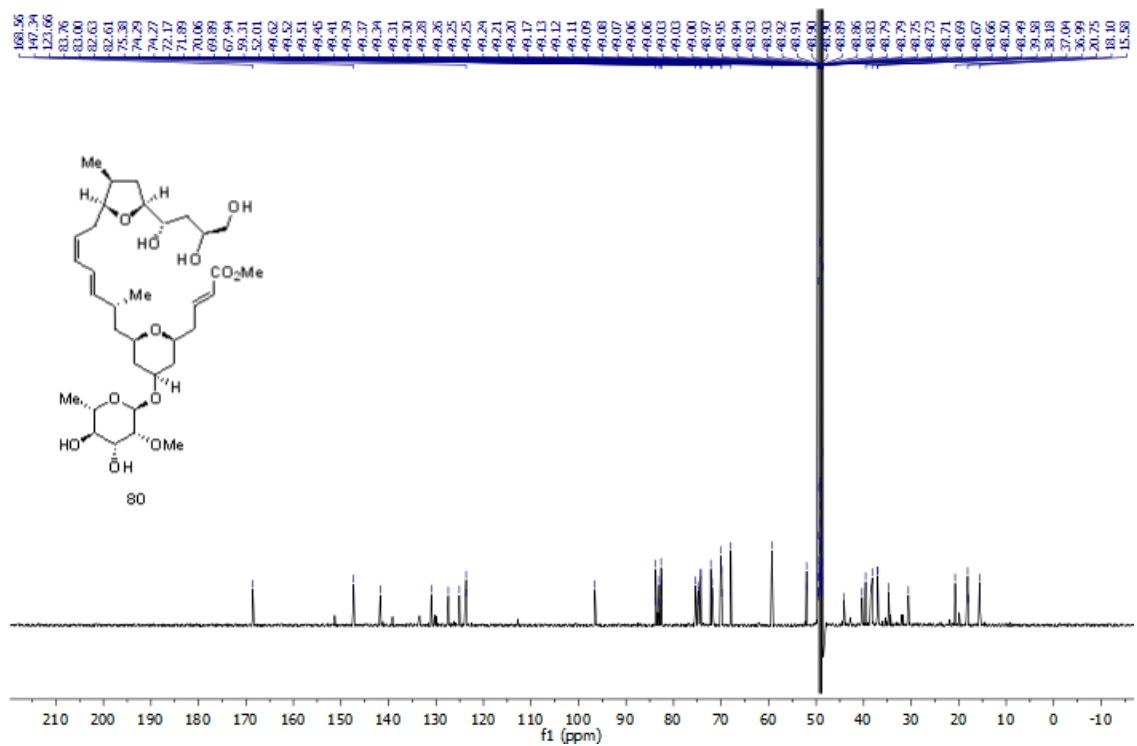



The 600 MHz  $^1\text{H-NMR}$  Spectrum of Compound **75** in  $\text{CDCl}_3$

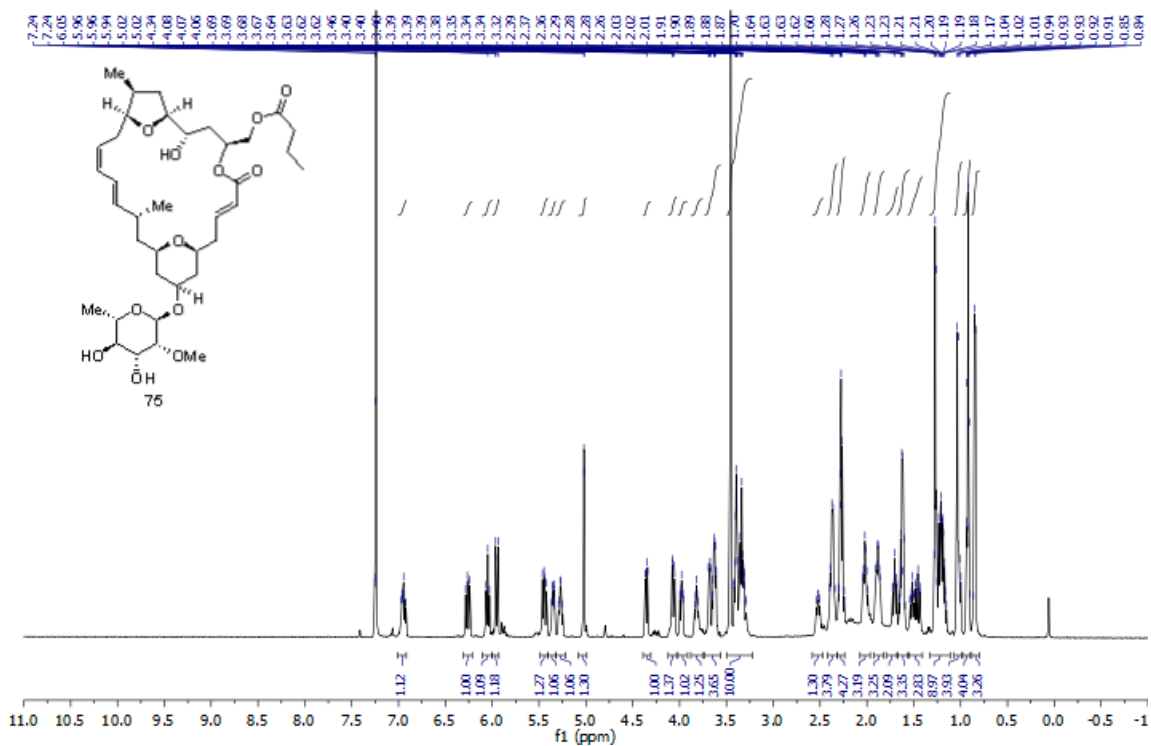

The 125 MHz  $^{13}\text{C-NMR}$  Spectrum of Compound **75** in  $\text{CDCl}_3$

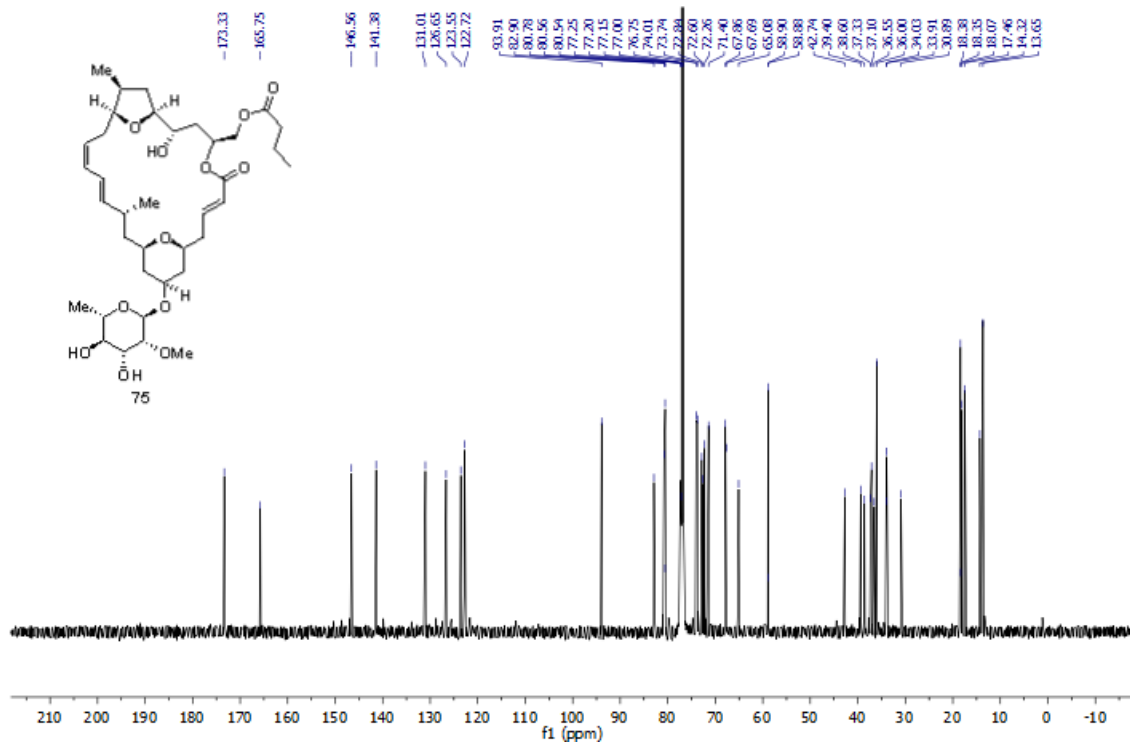



The 600 MHz  $^1\text{H-NMR}$  Spectrum of Compound **77** in  $\text{CDCl}_3$

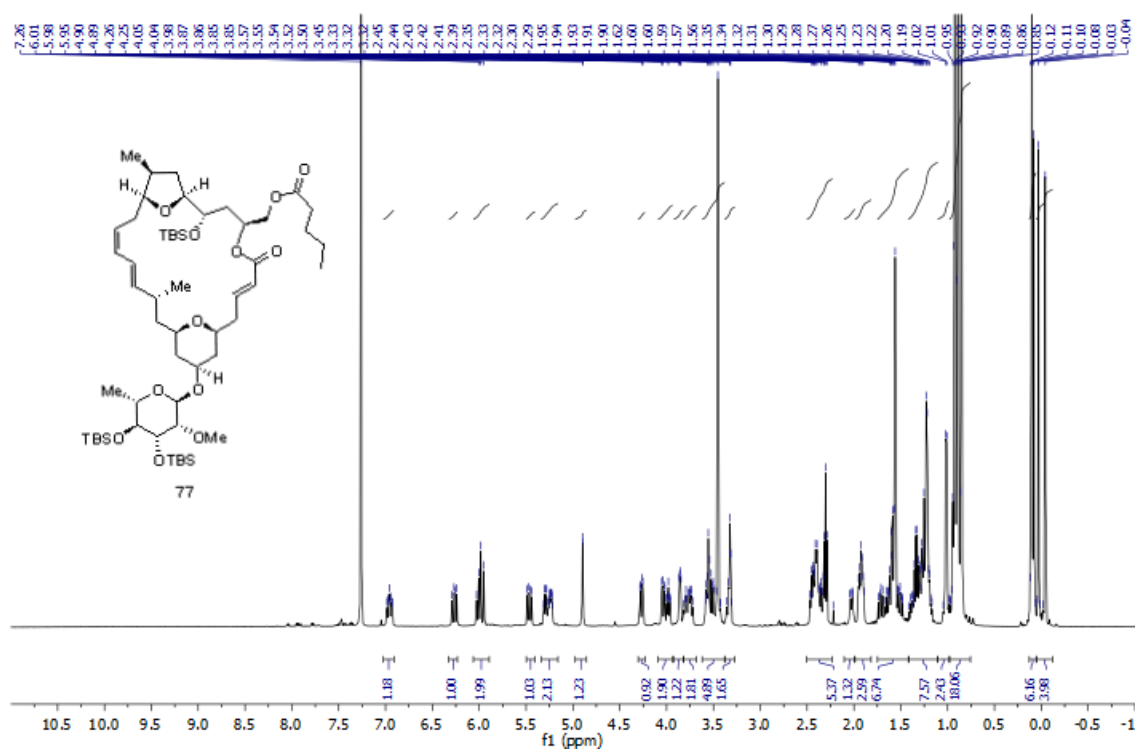

The 125 MHz  $^{13}\text{C-NMR}$  Spectrum of Compound **77** in  $\text{CDCl}_3$

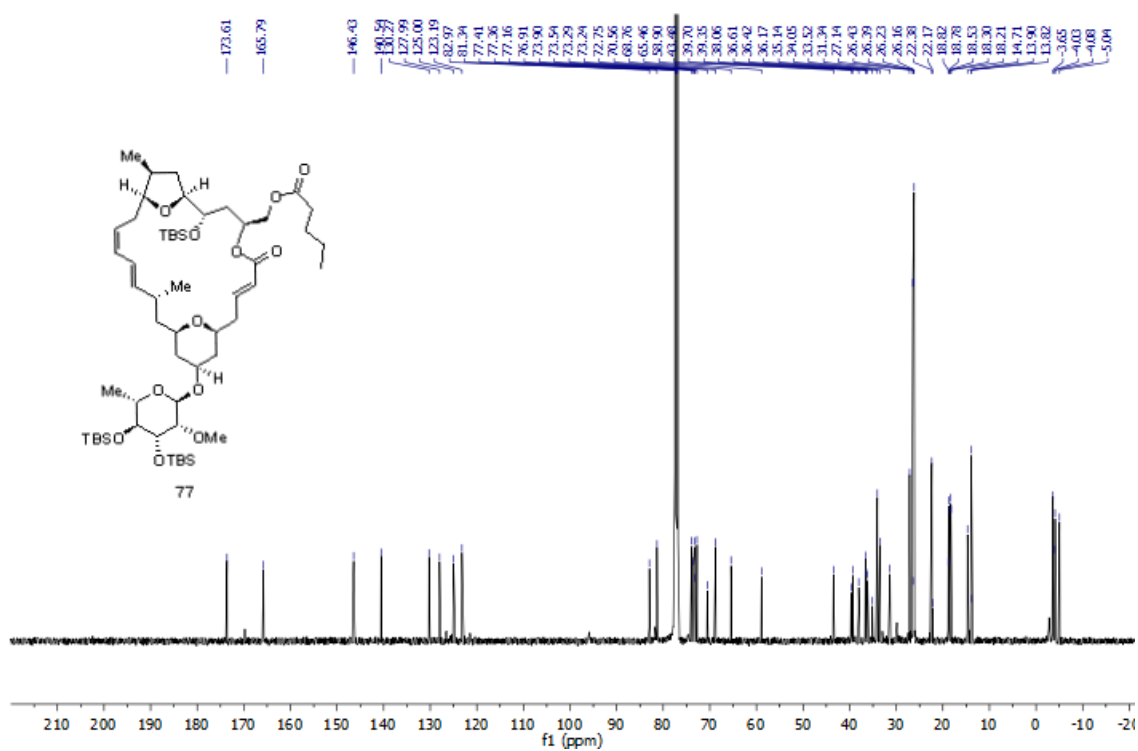



The 500 MHz <sup>1</sup>H-NMR Spectrum of Compound **82a** in CDCl<sub>3</sub>

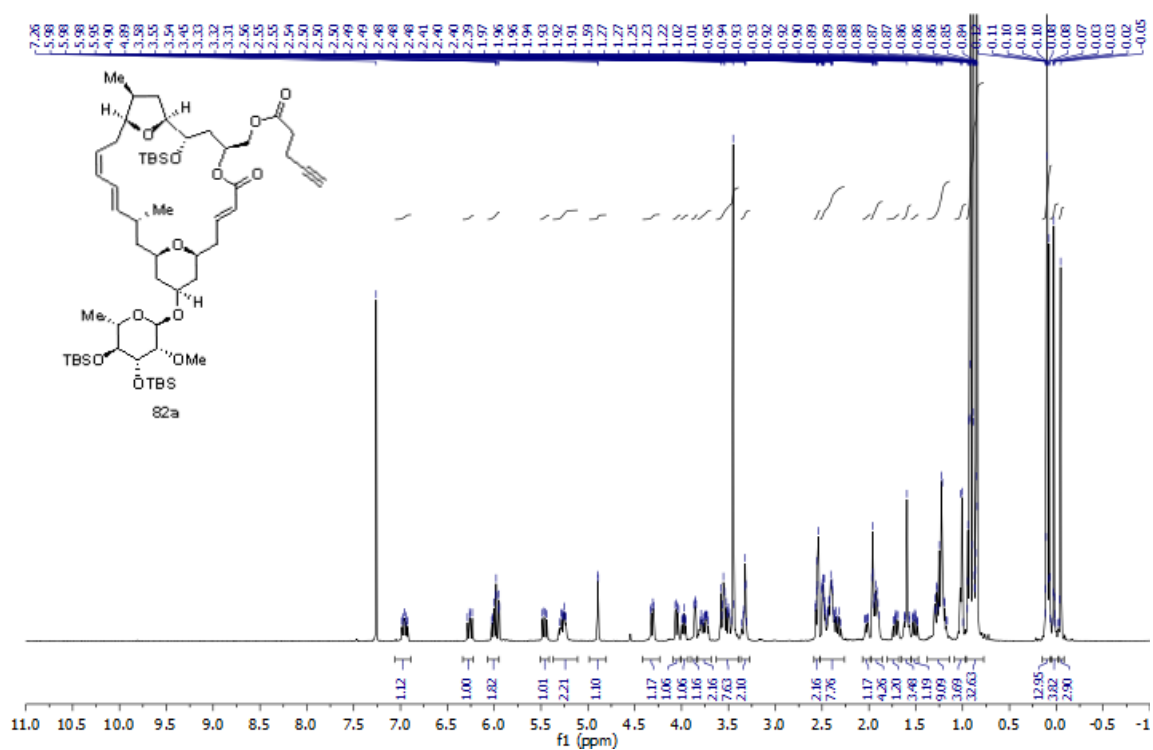

The 125 MHz <sup>13</sup>C-NMR Spectrum of Compound **82a** in CDCl<sub>3</sub>

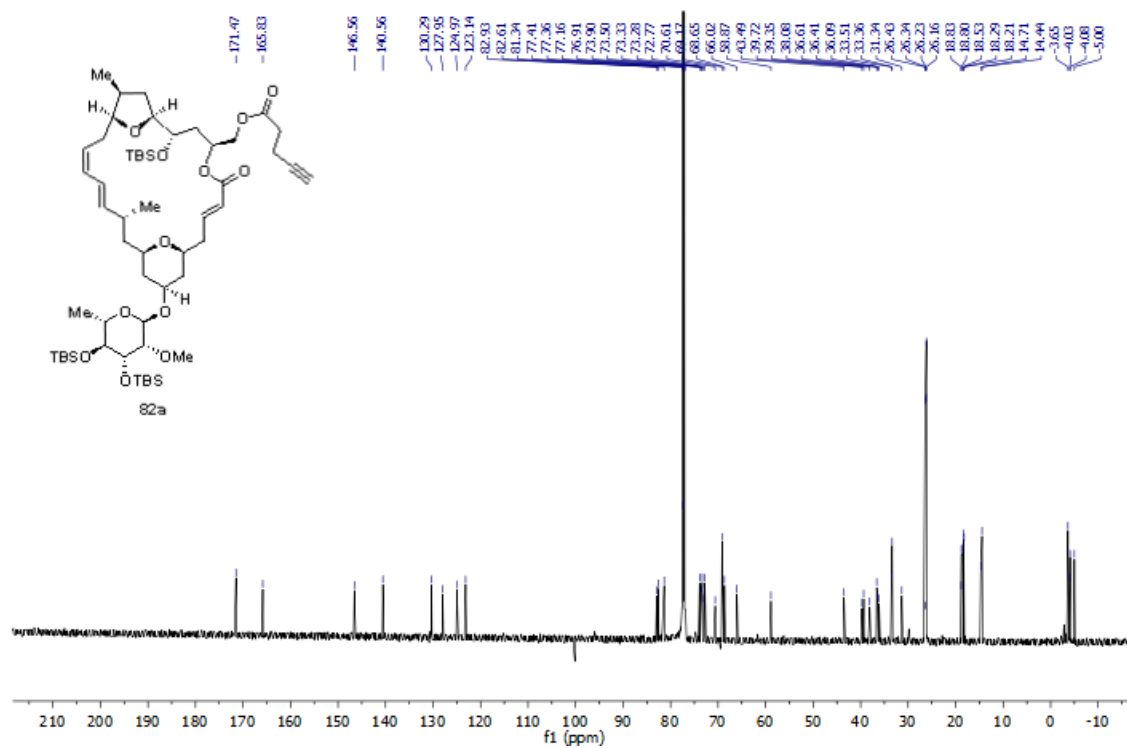

The 600 MHz <sup>1</sup>H-NMR Spectrum of Compound **82** in CDCl<sub>3</sub>

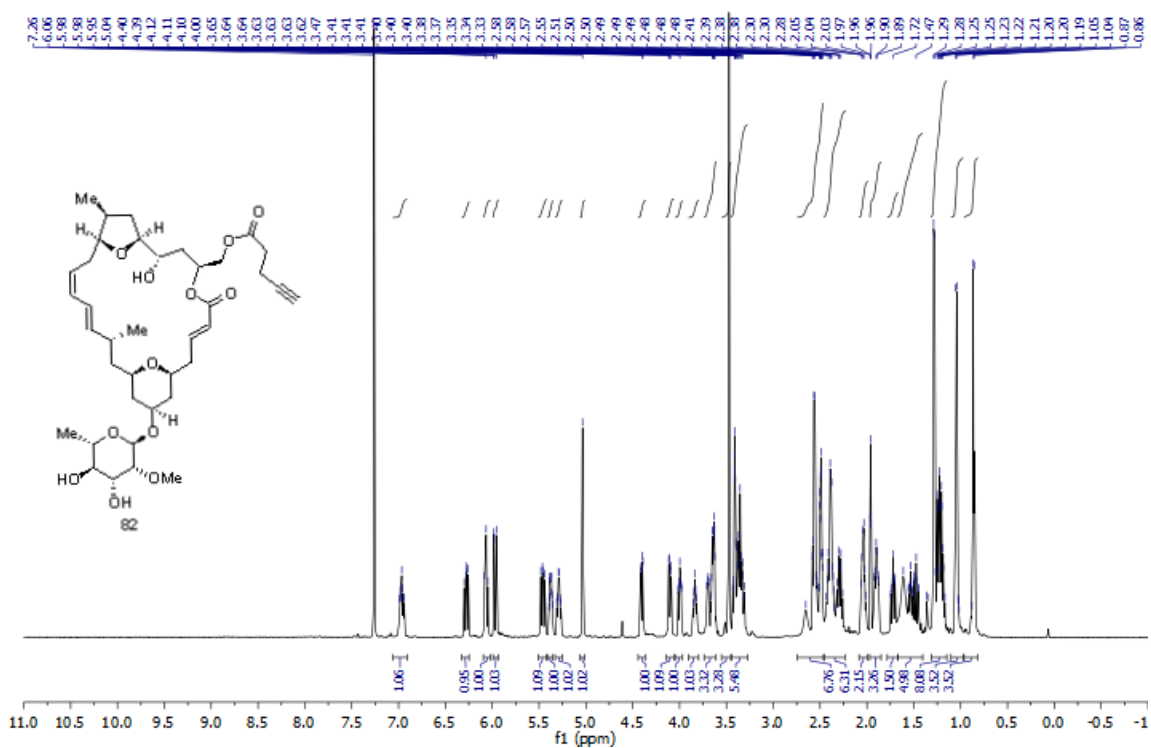

The 125 MHz <sup>13</sup>C-NMR Spectrum of Compound **82** in CDCl<sub>3</sub>

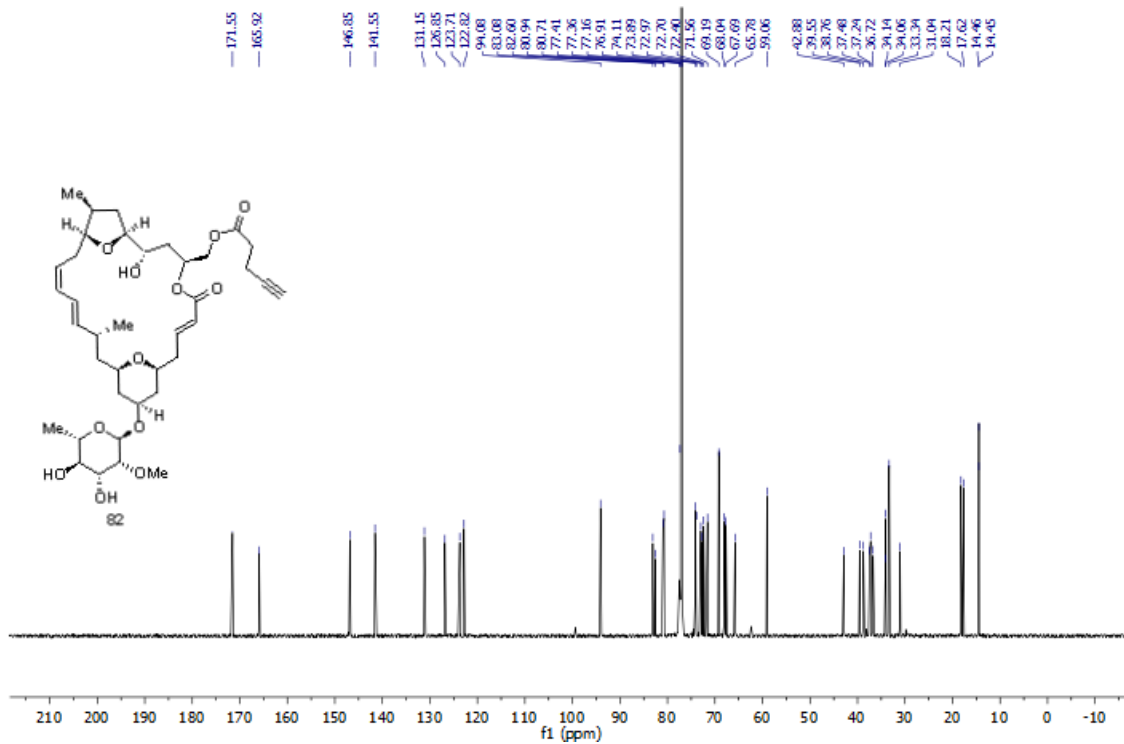

The 600 MHz <sup>1</sup>H-NMR Spectrum of Compound **84** in CD<sub>3</sub>OD

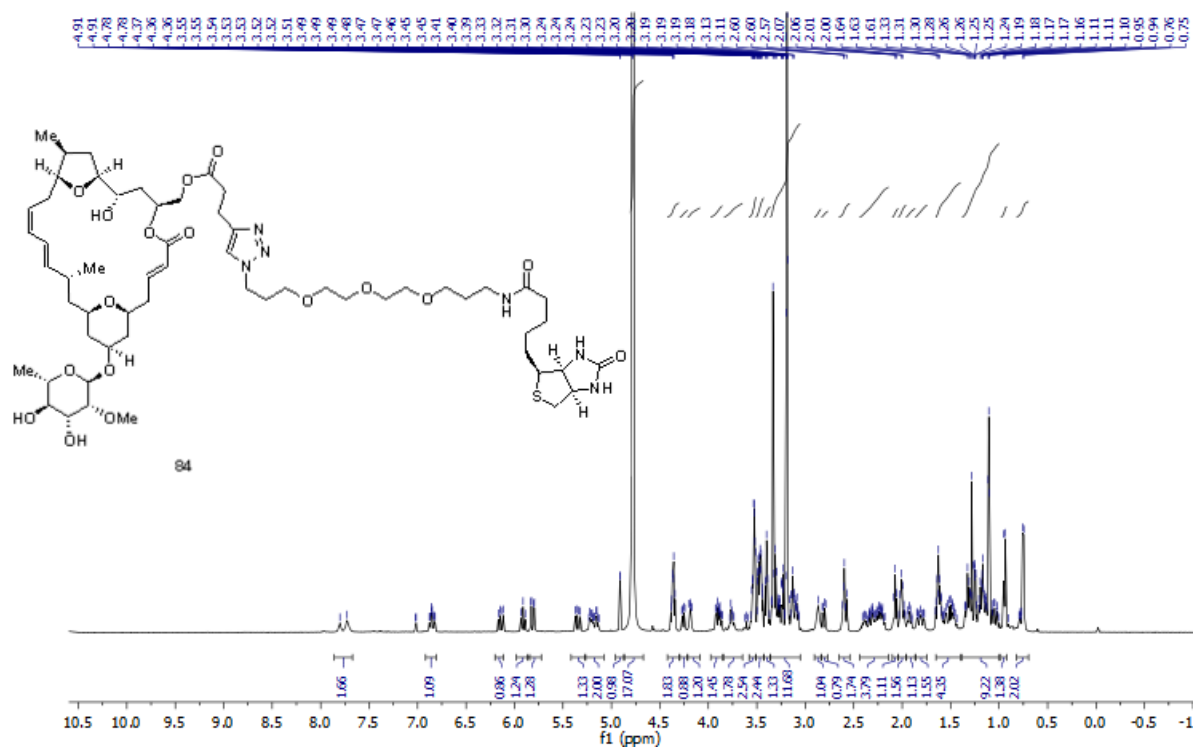

The 125 MHz <sup>13</sup>C-NMR Spectrum of Compound **84** in CD<sub>3</sub>OD

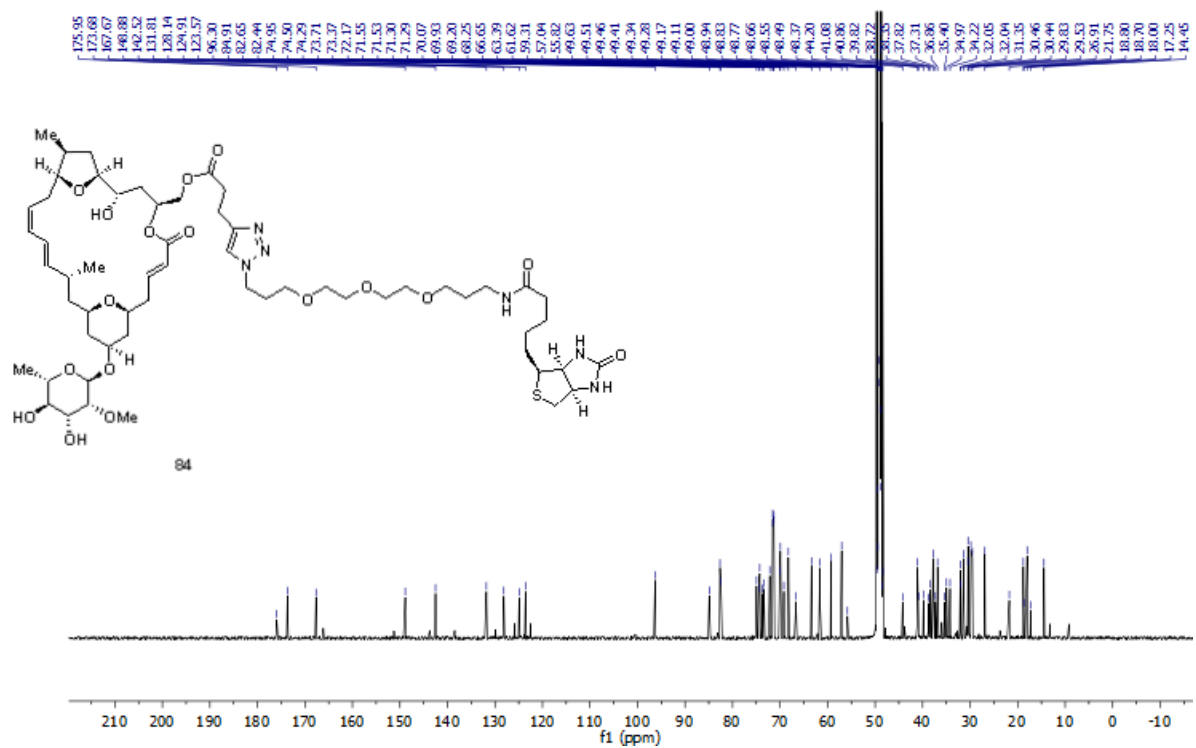

Supplement: NIHMS944779-supplement-supplimental_Information.pdf [file NIHMS944779-supplement-supplimental_Information.pdf]
